# Supplementary material for: Synthesis and Evaluation of MGB Polyamide-Oligonucleotide Conjugates as Gene Expression Control Compounds
Source: Hindawi journal article supplement (doi:10.1155/2023/2447998), 2023-03-14
Supplement: f1 [file 2447998.f1.pdf]

**Synthesis and evaluation of MGB polyamide-oligonucleotide conjugates as gene expression control compounds**

Kazuo Kamaike\*, Mutsumi Sano, Daisuke Sakata, Yu Nishihara, Hiroaki Amino, Akihiro Ohtsuki, Yui Okada, Takafumi Miyakawa, Makoto Kogawara, Mai Tsutsumi, Misato Takahashi, Etsuko Kawashima, Koichiro Ota, and Hiroaki Miyaoka

*School of Pharmacy, Tokyo University of Pharmacy and Life Sciences, 1432-1 Horinouchi, Hachioji, Tokyo 192-0392, Japan*

Correspondence should be addressed to Kazuo Kamaike; [kamaikek@toyaku.ac.jp](mailto:kamaikek@toyaku.ac.jp)

Contents:

|                                                                                                          |         |
|----------------------------------------------------------------------------------------------------------|---------|
| <b>Figure S1:</b> Mass, <sup>1</sup> H-NMR and <sup>13</sup> C-NMR spectra of the synthesized compounds. | S2-S65  |
| <b>Figure S2:</b> UV spectra of MGB amide compounds <b>4</b> , <b>6</b> , <b>28</b> and <b>34</b> .      | S66     |
| <b>Figure S3:</b> HPLC charts of MGB polyamide-oligonucleotide conjugates.                               | S67-S68 |
| <b>Figure S4:</b> Mass spectra of MGB polyamide-oligonucleotide conjugates.                              | S69-S78 |
| <b>Figure S5:</b> UV melting curves of modified dsDNAs.                                                  | S79-S82 |
| <b>Figure S6:</b> CD spectra of modified dsDNAs.                                                         | S83     |

Figure S1: Mass, <sup>1</sup>H-NMR and <sup>13</sup>C-NMR spectra of the synthesized compounds.

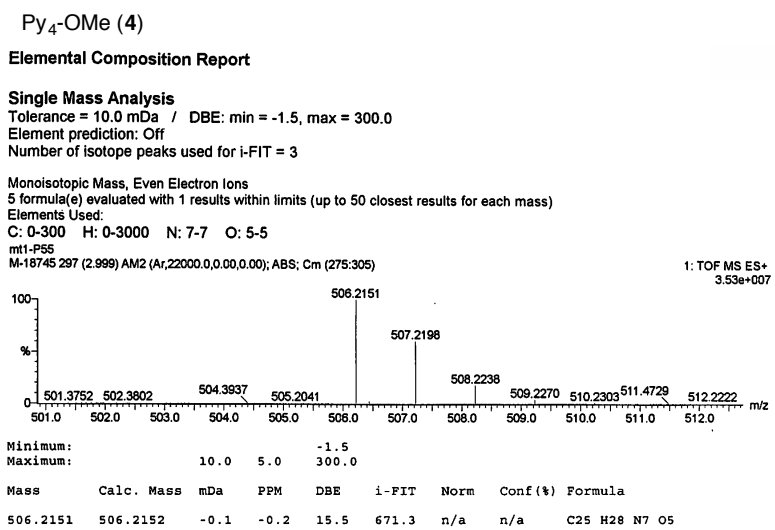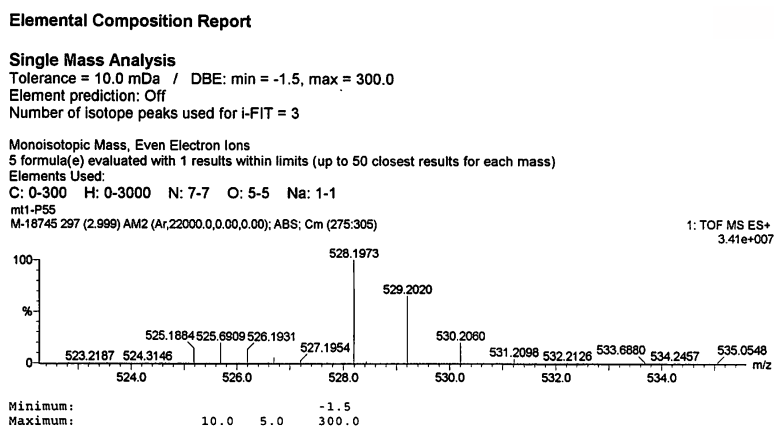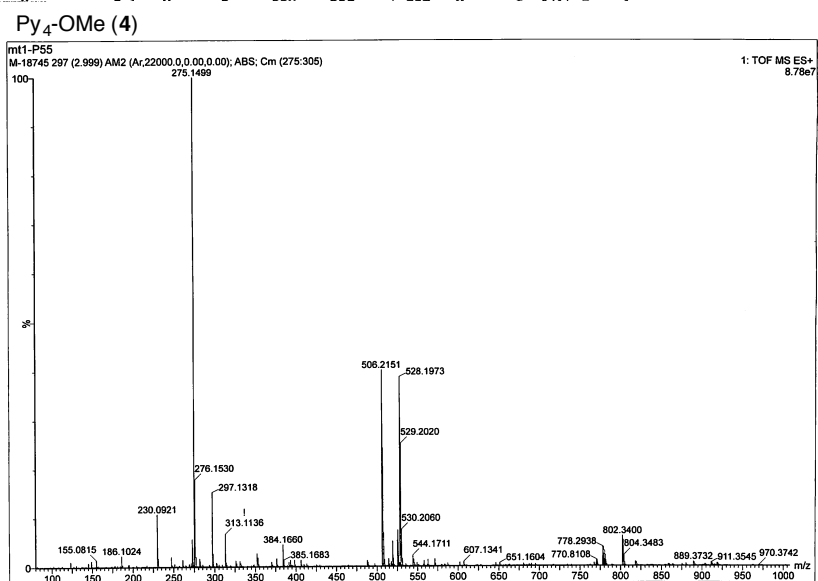

Py<sub>4</sub>-OMe (4) <sup>1</sup>H-NMR (DMSO-d<sub>6</sub>)

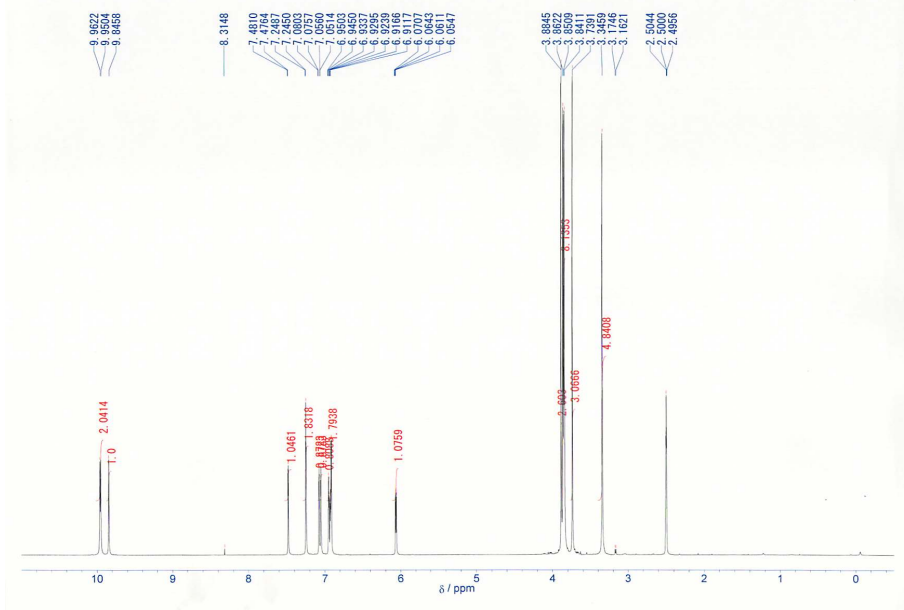

Py<sub>4</sub>-OMe (4) <sup>13</sup>C-NMR (DMSO-d<sub>6</sub>)

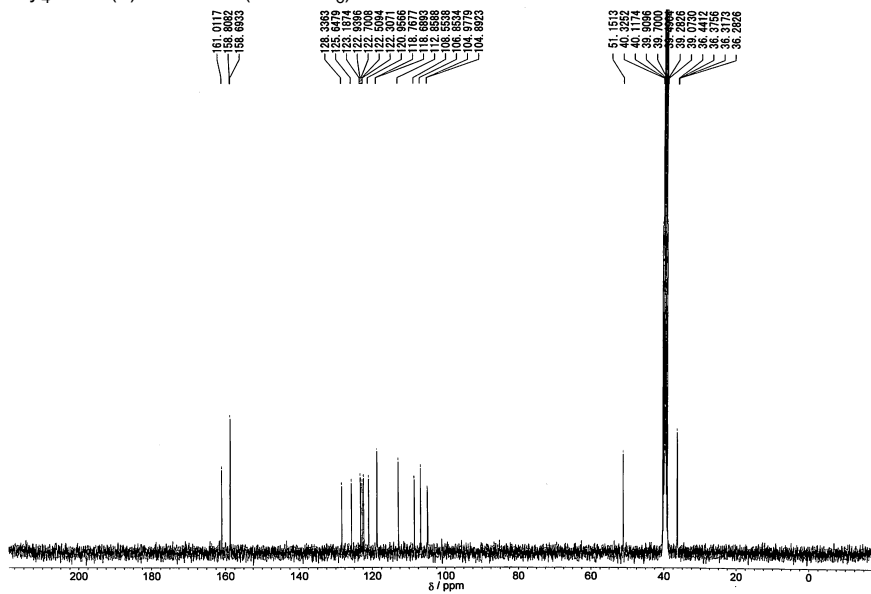

Py<sub>4</sub>-OH (carboxylic acid)  
Elemental Composition Report

Single Mass Analysis

Tolerance = 10.0 mDa / DBE: min = -1.5, max = 300.0  
Element prediction: Off  
Number of isotope peaks used for i-FIT = 3

Monoisotopic Mass, Even Electron Ions

5 formula(e) evaluated with 1 results within limits (up to 50 closest results for each mass)

Elements Used:

C: 1-300 H: 1-1000 N: 7-7 O: 5-5

Py<sub>4</sub>OH

M-12583 221 (1.785) AM2 (Ar,22000.0,0.00,0.00); ABS; Cm (189:226)

1: TOF MS ES+  
1.41e+007

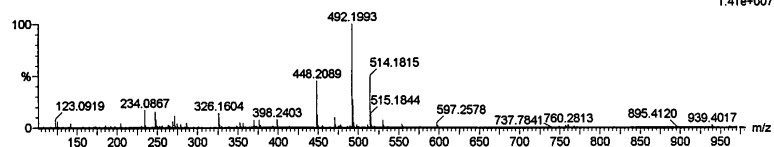

Minimum: -1.5  
Maximum: 10.0 20.0 300.0

| Mass     | Calc. Mass | mDa  | PPM  | DBE  | i-FIT | Norm | Conf(%) | Formula       |
|----------|------------|------|------|------|-------|------|---------|---------------|
| 492.1993 | 492.1995   | -0.2 | -0.4 | 15.5 | 553.4 | n/a  | n/a     | C24 H26 N7 O5 |

Py<sub>4</sub>-OH (carboxylic acid)

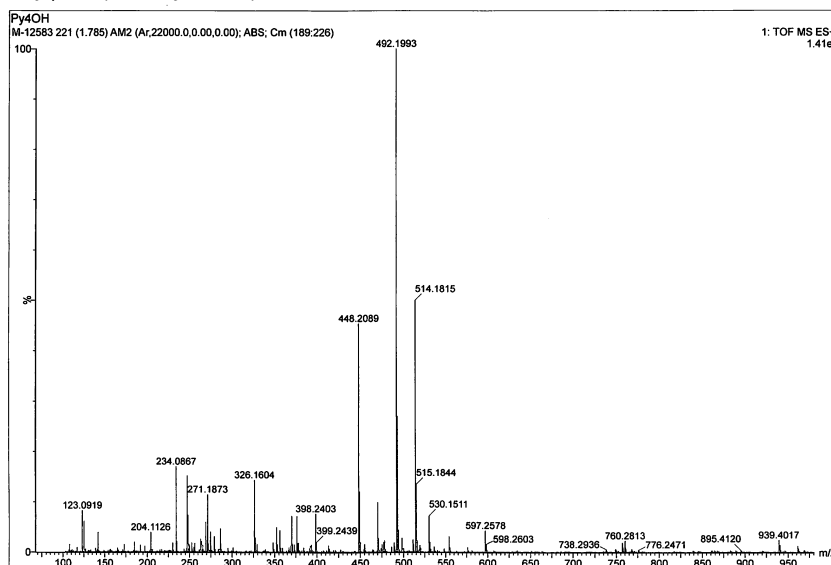



Py<sub>4</sub>-OH (carboxylic acid) <sup>1</sup>H-NMR (DMSO-d<sub>6</sub>)

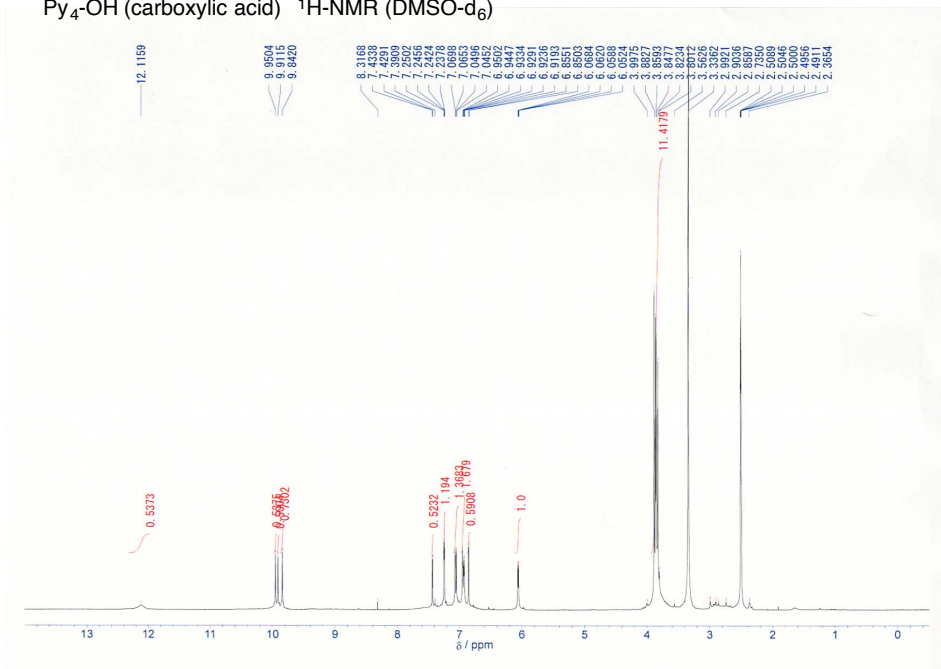

Py<sub>4</sub>-OH (carboxylic acid) <sup>13</sup>C-NMR (DMSO-d<sub>6</sub>)

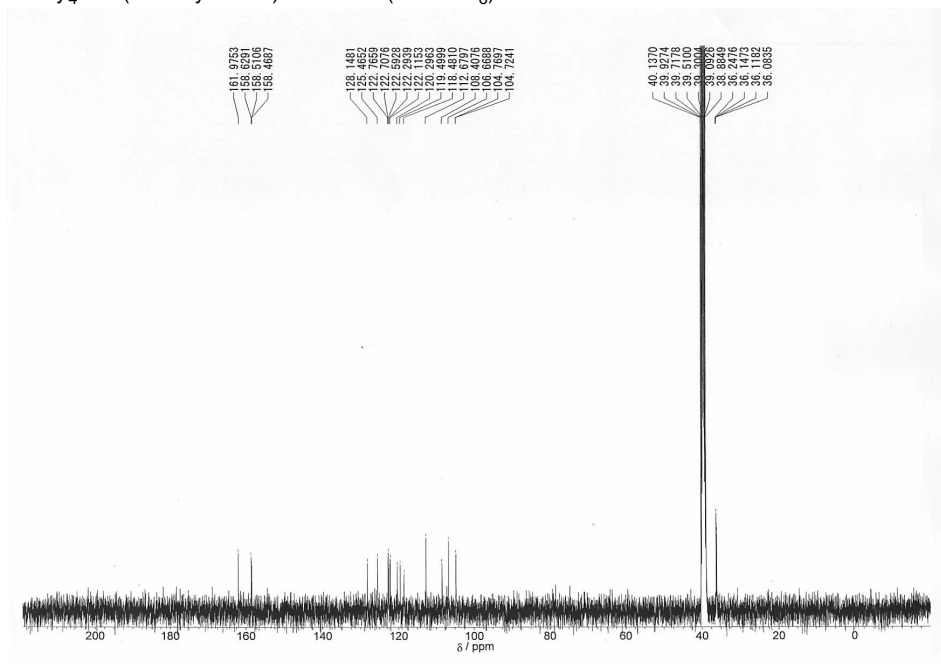

Py<sub>3</sub>-OMe (6)

Elemental Composition Report

Single Mass Analysis (displaying only valid results)

Tolerance = 15.0 PPM / DBE: min = -1.5, max = 40.0

Isotope cluster parameters: Separation = 1.0 Abundance = 1.0%

Monoisotopic Mass, Odd and Even Electron Ions

34 formula(e) evaluated with 1 results within limits (all results (up to 1000) for each mass)

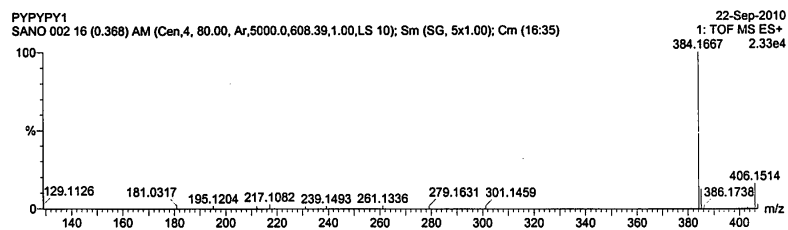

Minimum: -1.5  
Maximum: 40.0

| Mass     | Calc. Mass | mDa  | PPM  | DBE  | Score | Formula       |
|----------|------------|------|------|------|-------|---------------|
| 384.1667 | 384.1672   | -0.4 | -1.1 | 11.5 | 1     | C19 H22 N5 O4 |

Py<sub>3</sub>-OMe (6)

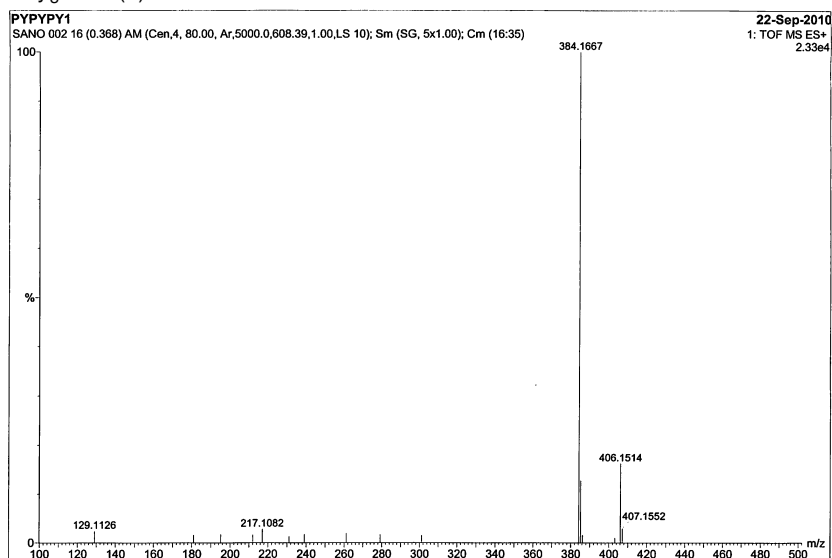

Py<sub>3</sub>-OMe (6) <sup>1</sup>H-NMR (DMSO-d<sub>6</sub>)

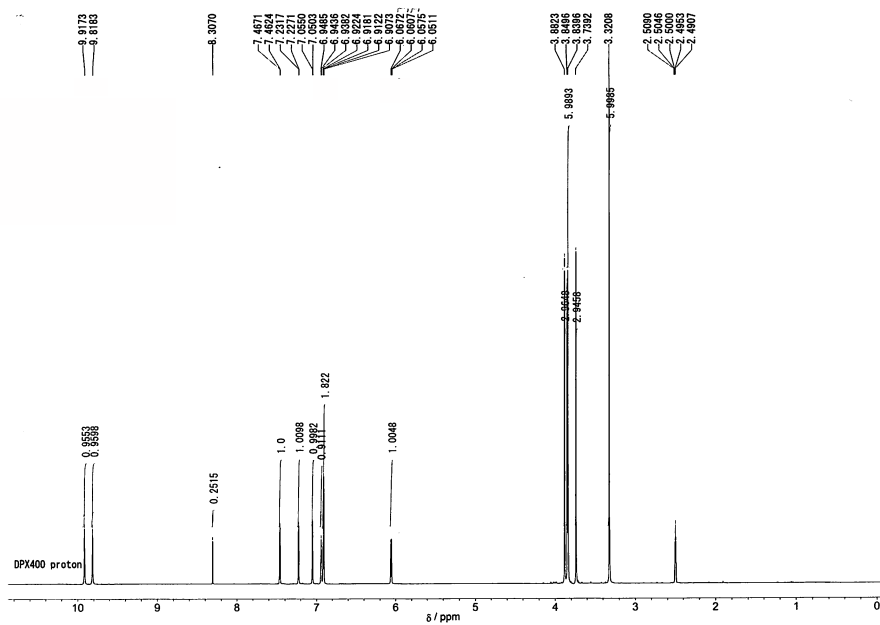

Py<sub>3</sub>-OMe (6) <sup>13</sup>C-NMR (DMSO-d<sub>6</sub>)

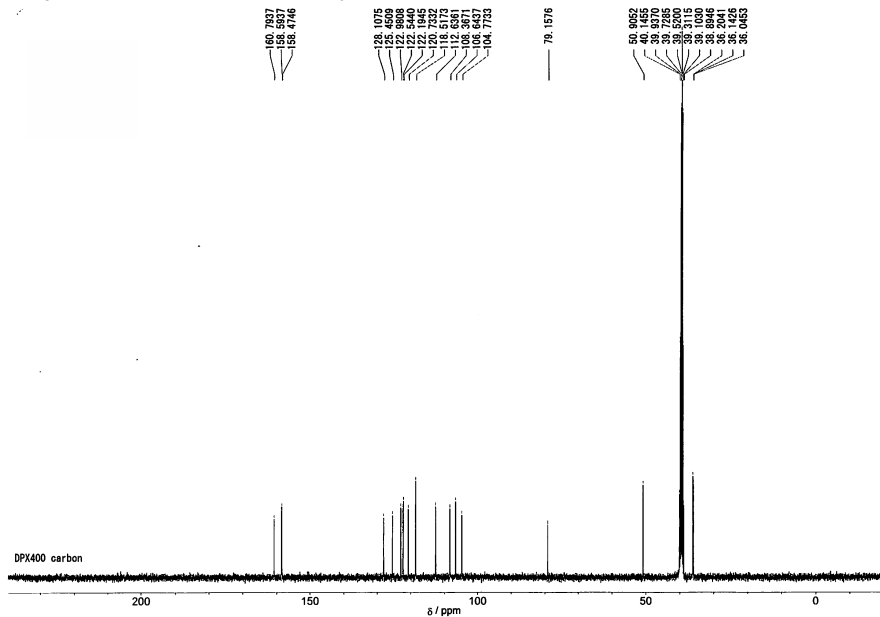

Py<sub>3</sub>-OH (carboxylic acid)

Elemental Composition Report

Single Mass Analysis

Tolerance = 10.0 mDa / DBE: min = -1.5, max = 300.0  
Element prediction: Off  
Number of isotope peaks used for i-FIT = 3

Monoisotopic Mass, Even Electron Ions

4 formula(e) evaluated with 1 results within limits (up to 50 closest results for each mass)

Elements Used:

C: 0-300 H: 0-1000 N: 5-5 O: 4-4

py3OH

M-11932 MeOH 162 (1.308) AM2 (Ar,22000.0,0.00,0.00); ABS; Cm (133:169)

1: TOF MS ES+  
1.22e+008

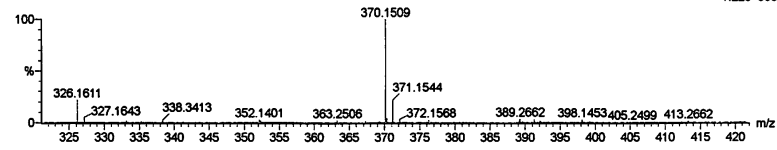

Minimum: -1.5  
Maximum: 10.0 20.0 300.0

| Mass     | Calc. Mass | mDa  | PPM  | DBE  | i-FIT | Norm | Conf (%) | Formula       |
|----------|------------|------|------|------|-------|------|----------|---------------|
| 370.1509 | 370.1515   | -0.6 | -1.6 | 11.5 | 835.8 | n/a  | n/a      | C18 H20 N5 O4 |

Py<sub>3</sub>-OH (carboxylic acid)

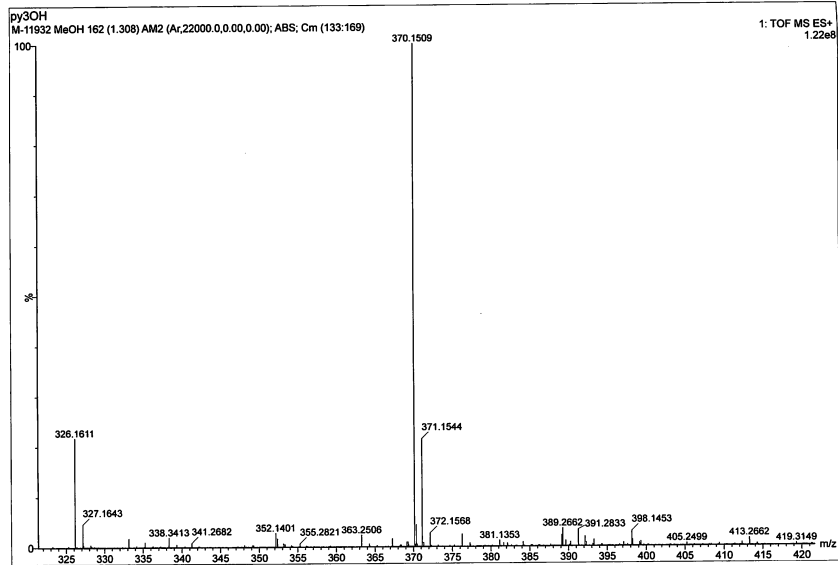

Py<sub>3</sub>-OH (carboxylic acid) <sup>1</sup>H-NMR (DMSO-d<sub>6</sub>)

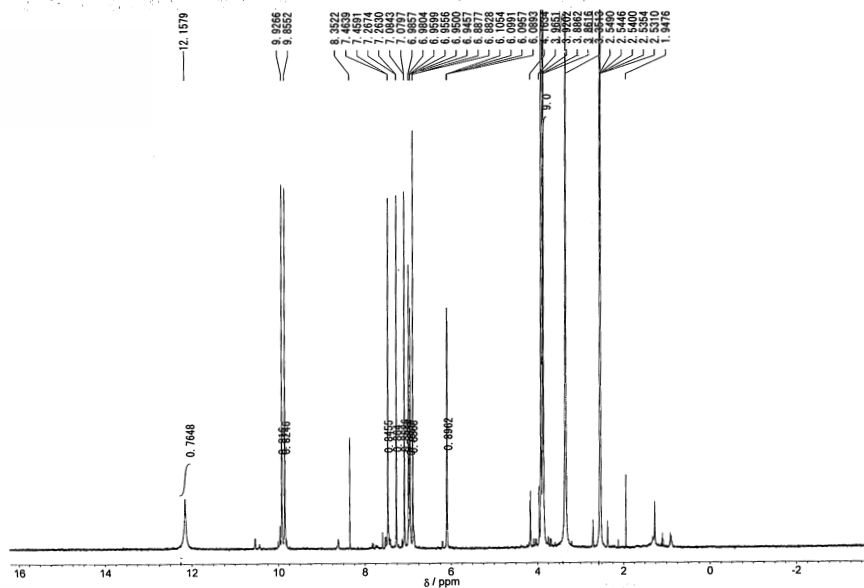

Py<sub>3</sub>-OH (carboxylic acid) <sup>13</sup>C-NMR (DMSO-d<sub>6</sub>)

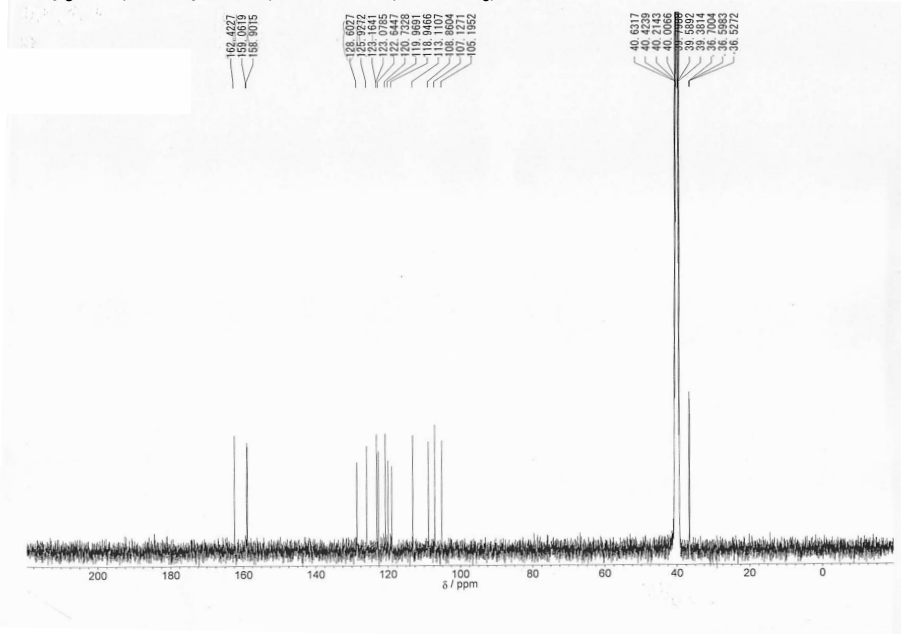

FmocNH(CH<sub>2</sub>)<sub>2</sub>NH<sub>2</sub> · HCl (8)

Elemental Composition Report

Single Mass Analysis

Tolerance = 20.0 PPM / DBE: min = -1.5, max = 50.0

Element prediction: Off

Number of isotope peaks used for i-FIT = 3

Monoisotopic Mass, Even Electron Ions

4 formula(e) evaluated with 1 results within limits (up to 50 closest results for each mass)

Elements Used:

C: 1-300 H: 1-1000 N: 2-2 O: 2-2

Fmoc C 205

M-10247 57 (1.198) AM2 (Ar,30000.0,0.00,0.00); ABS; Cm (56.64)

1: TOF MS ES+  
8.71e+006

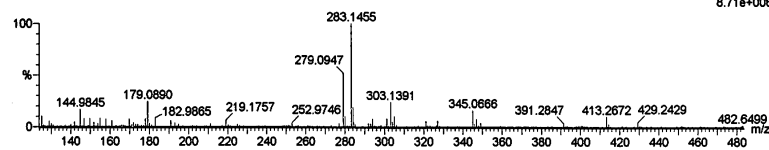

Minimum: 3.0 20.0 -1.5  
Maximum: 50.0

| Mass     | Calc. Mass | mDa | PPM | DBE | i-FIT | Norm | Conf (%) | Formula       |
|----------|------------|-----|-----|-----|-------|------|----------|---------------|
| 283.1455 | 283.1447   | 0.8 | 2.8 | 9.5 | 897.5 | n/a  | n/a      | C17 H19 N2 O2 |

FmocNH(CH<sub>2</sub>)<sub>2</sub>NH<sub>2</sub> · HCl (8)

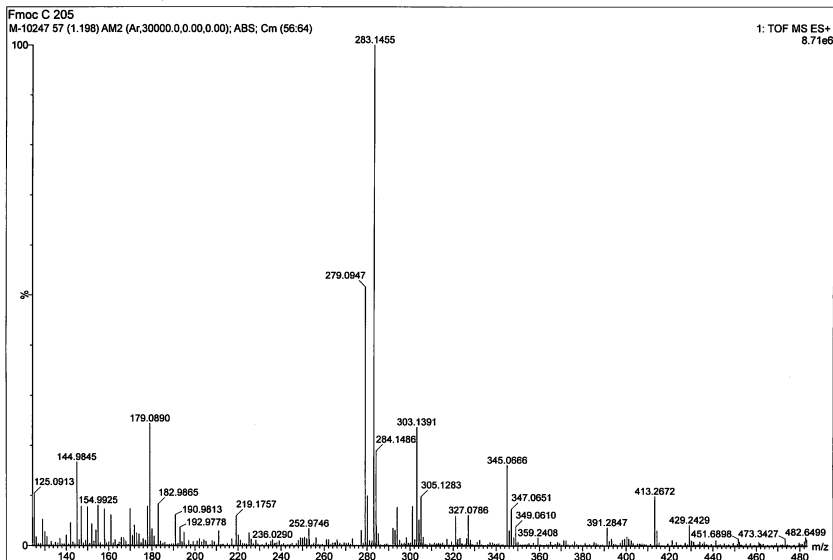

FmocNH(CH<sub>2</sub>)<sub>2</sub>NH<sub>2</sub> · HCl (**8**) <sup>1</sup>H-NMR (CD<sub>3</sub>OD)

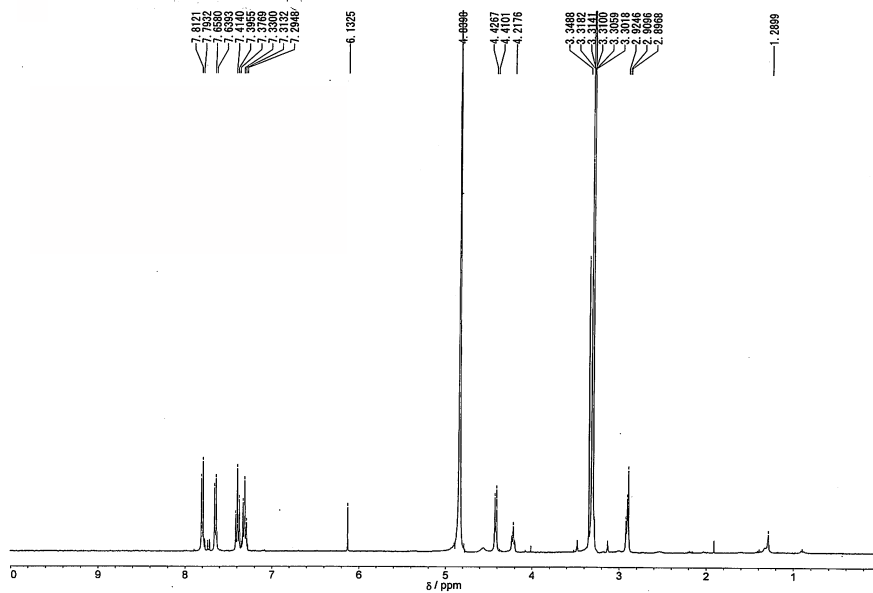

FmocNH(CH<sub>2</sub>)<sub>2</sub>NH<sub>2</sub> · HCl (**8**) <sup>13</sup>C-NMR (CD<sub>3</sub>OD)

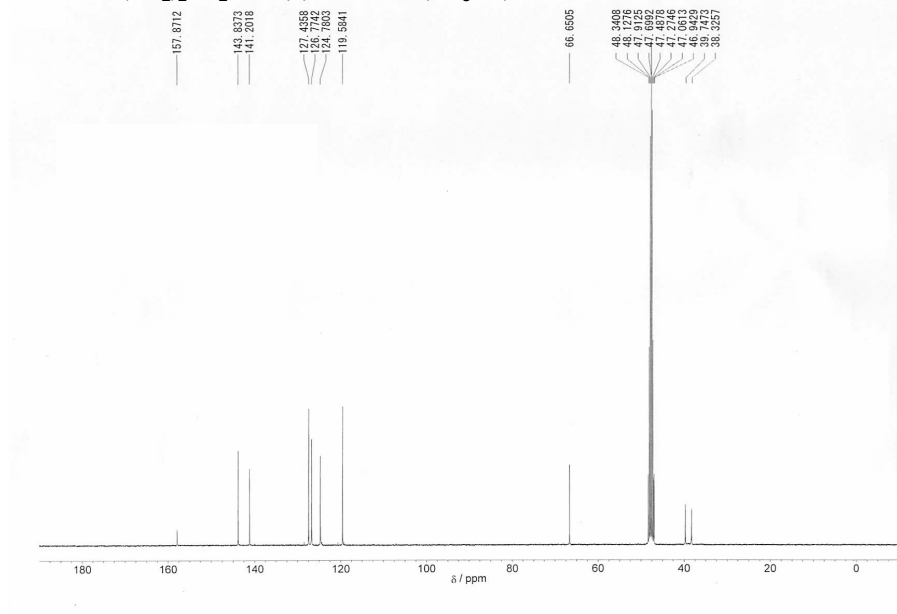

# FmocNH(CH<sub>2</sub>)<sub>4</sub>NH<sub>2</sub> · HCl (10)

## Elemental Composition Report

### Single Mass Analysis

Tolerance = 20.0 PPM / DBE: min = -1.5, max = 300.0

Element prediction: Off

Number of isotope peaks used for i-FIT = 3

Monoisotopic Mass, Even Electron Ions

4 formula(e) evaluated with 1 results within limits (up to 50 closest results for each mass)

Elements Used:

C: 1-300 H: 1-1000 N: 2-2 O: 2-2

FmocC4

M-11599 200 (4.166) AM2 (Ar,22000.0,0.00,0.00); ABS; Cm (199:213)

1: TOF MS ES+  
9.18e+007

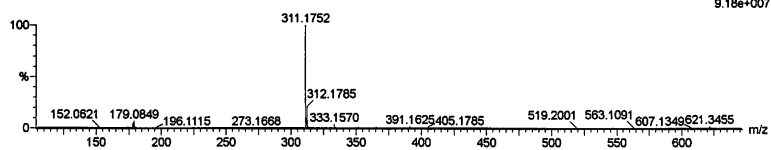

Minimum: -1.5  
Maximum: 100.0 20.0 300.0

| Mass     | Calc. Mass | mDa  | PPM  | DBE | i-FIT | Norm | Conf (%) | Formula       |
|----------|------------|------|------|-----|-------|------|----------|---------------|
| 311.1752 | 311.1760   | -0.8 | -2.6 | 9.5 | 836.2 | n/a  | n/a      | C19 H23 N2 O2 |

# FmocNH(CH<sub>2</sub>)<sub>4</sub>NH<sub>2</sub> · HCl (10)

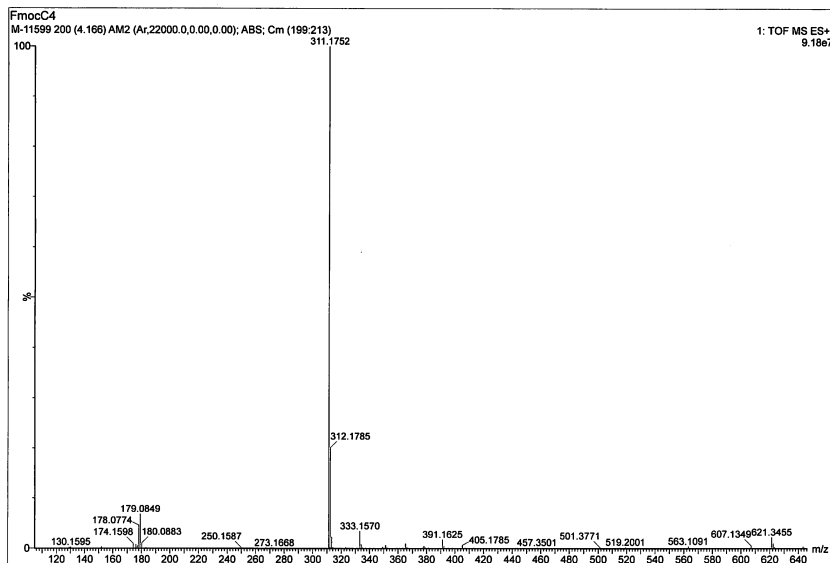



FmocNH(CH<sub>2</sub>)<sub>4</sub>NH<sub>2</sub> · HCl (**10**) <sup>1</sup>H-NMR (CD<sub>3</sub>OD)

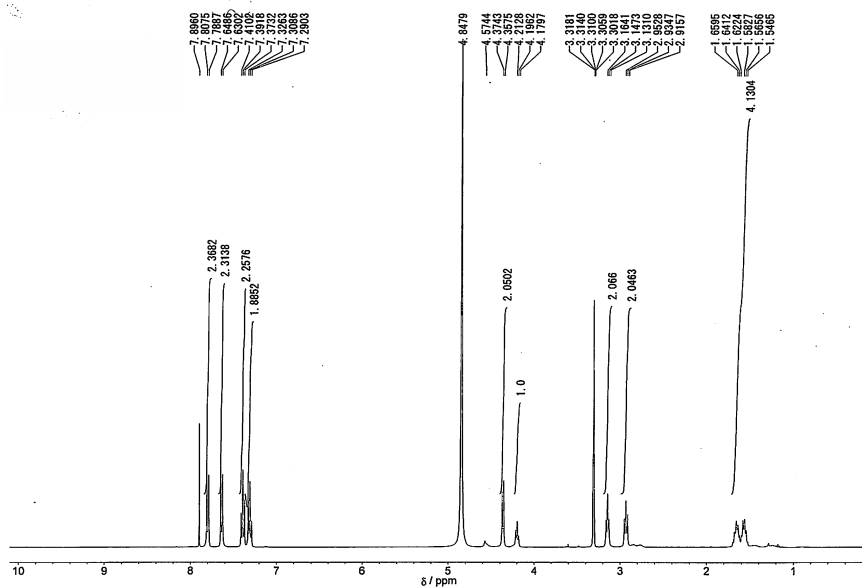

FmocNH(CH<sub>2</sub>)<sub>4</sub>NH<sub>2</sub> · HCl (**10**) <sup>13</sup>C-NMR (DMSO-d<sub>6</sub>)

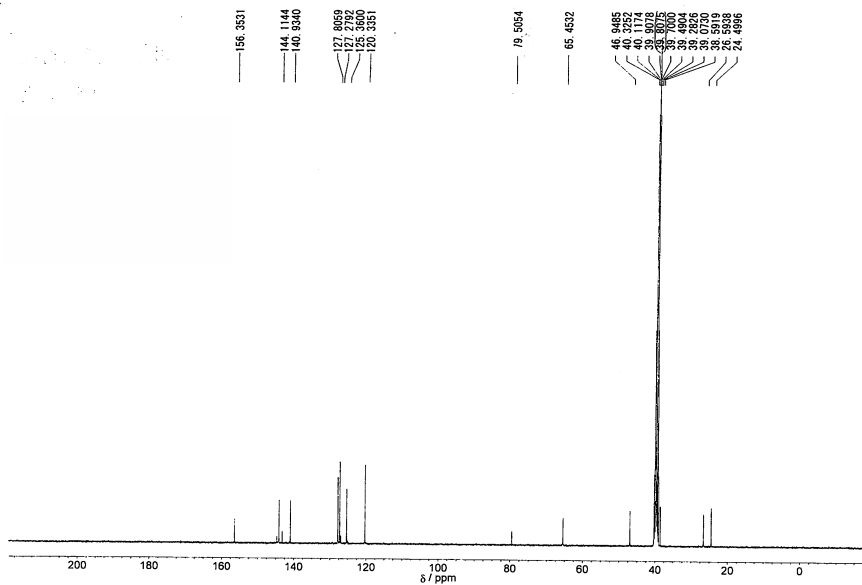

FmocNH(CH<sub>2</sub>)<sub>5</sub>NH<sub>2</sub> · HCl (11)

**Elemental Composition Report**

**Single Mass Analysis (displaying only valid results)**

Tolerance = 10.0 PPM / DBE: min = -1.5, max = 40.0

Isotope cluster parameters: Separation = 1.0 Abundance = 1.0%

Monoisotopic Mass, Odd and Even Electron Ions

113 formula(e) evaluated with 1 results within limits (all results (up to 1000) for each mass)

FMOC 5  
SANO 004 19 (0.442) AM (Cen,4, 80.00, Ar,5000.0,520.33,1.00,LS 10); Sm (SG, 5x1.00); Cm (1:20)

26-Oct-2009  
1: TOF MS ES+  
5.31e4

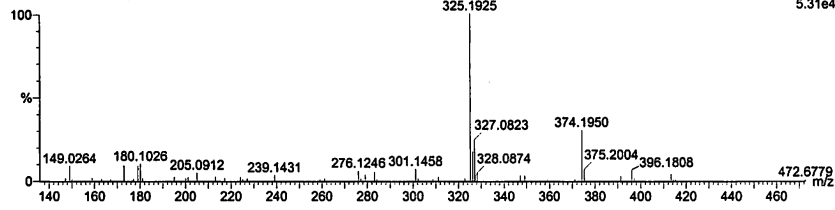

Minimum: -1.5  
Maximum: 10.0 10.0 40.0

| Mass     | Calc. Mass | mDa | PPM | DBE | Score | Formula       |
|----------|------------|-----|-----|-----|-------|---------------|
| 325.1925 | 325.1916   | 0.9 | 2.8 | 9.5 | 1     | C20 H25 N2 O2 |

FmocNH(CH<sub>2</sub>)<sub>5</sub>NH<sub>2</sub> · HCl (11)

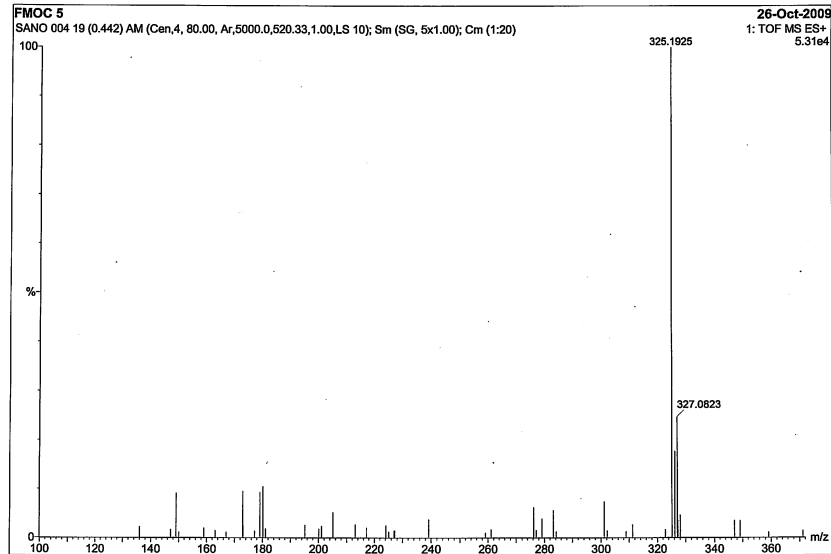

FmocNH(CH<sub>2</sub>)<sub>5</sub>NH<sub>2</sub> · HCl (11) <sup>1</sup>H-NMR (CD<sub>3</sub>OD)

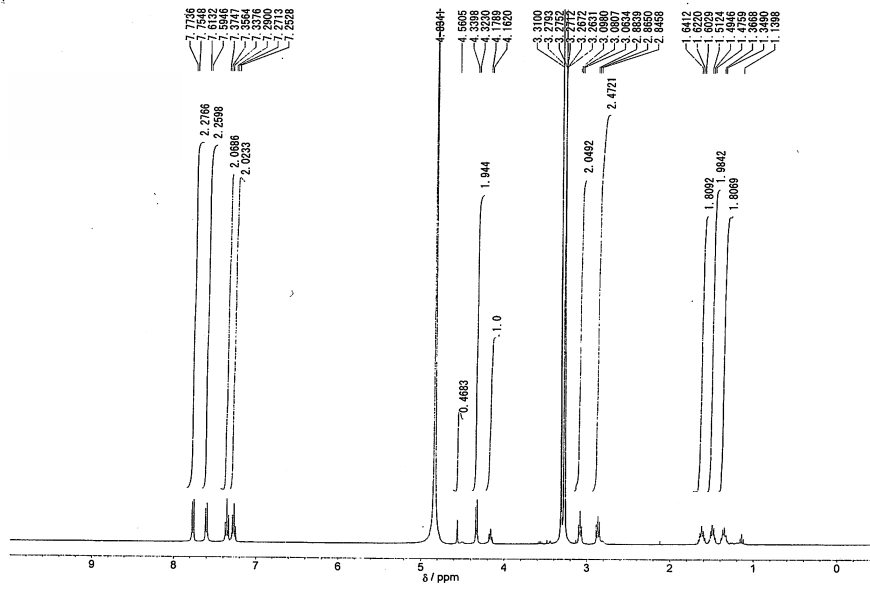

FmocNH(CH<sub>2</sub>)<sub>5</sub>NH<sub>2</sub> · HCl (11) <sup>13</sup>C-NMR (CD<sub>3</sub>OD)

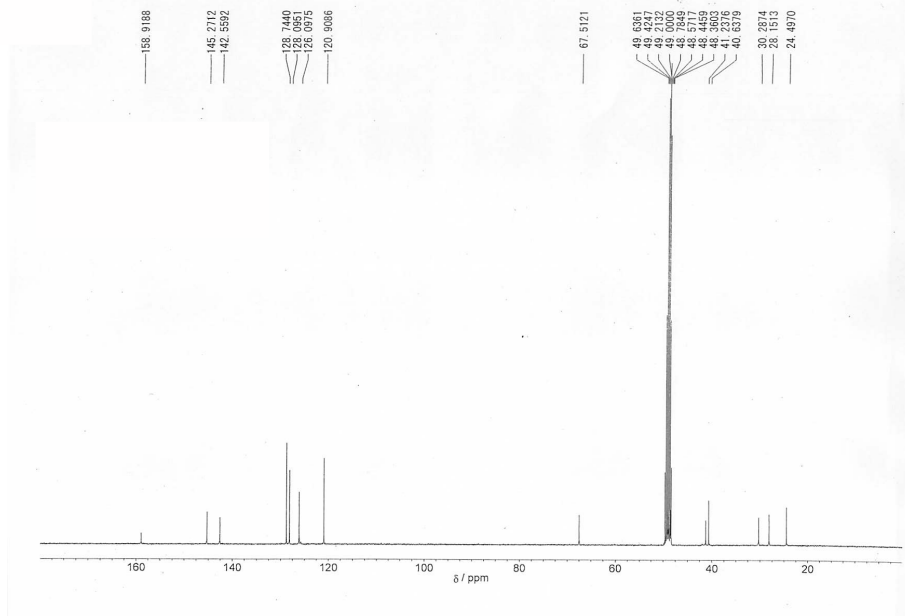

Py<sub>4</sub>-NH(CH<sub>2</sub>)<sub>4</sub>NHFmoc (13)

Elemental Composition Report

Single Mass Analysis (displaying only valid results)

Tolerance = 10.0 PPM / DBE: min = -1.5, max = 40.0

Isotope cluster parameters: Separation = 1.0 Abundance = 1.0%

Monoisotopic Mass, Odd and Even Electron Ions

196 formula(e) evaluated with 4 results within limits (all results (up to 1000) for each mass)

Fmoc 4PY  
SANO 001 17 (0.313) AM (Cen,3, 80.00, Ht,5000.0,0.00,0.80); Sm (SG, 2x3.00); Cm (13:17)

26-Oct-2009  
1: TOF MS ES+  
761

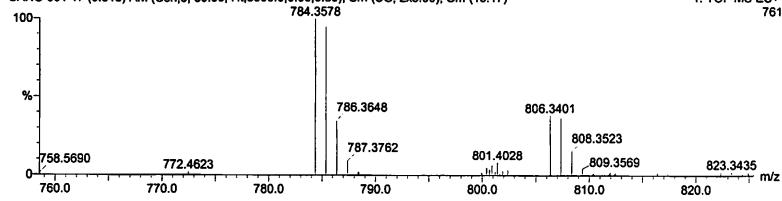

Minimum: -1.5  
Maximum: 10.0 10.0 40.0

| Mass     | Calc. Mass | mDa  | PPM  | DBE  | Score | Formula          |
|----------|------------|------|------|------|-------|------------------|
| 784.3578 | 784.3571   | 0.7  | 0.9  | 25.5 | 3     | C43 H46 N9 O6    |
|          | 784.3601   | -2.2 | -2.8 | 26.0 | 2     | C48 H49 N4 O5 Na |
|          | 784.3547   | 3.1  | 4.0  | 22.5 | 4     | C41 H47 N9 O6 Na |
|          | 784.3625   | -4.6 | -5.9 | 29.0 | 1     | C50 H48 N4 O5    |

Py<sub>4</sub>-NH(CH<sub>2</sub>)<sub>4</sub>NHFmoc (13)

Fmoc 4PY  
SANO 001 17 (0.313) AM (Cen,3, 80.00, Ht,5000.0,0.00,0.80); Sm (SG, 2x3.00); Cm (13:17)

26-Oct-2009  
1: TOF MS ES+  
9.20e3

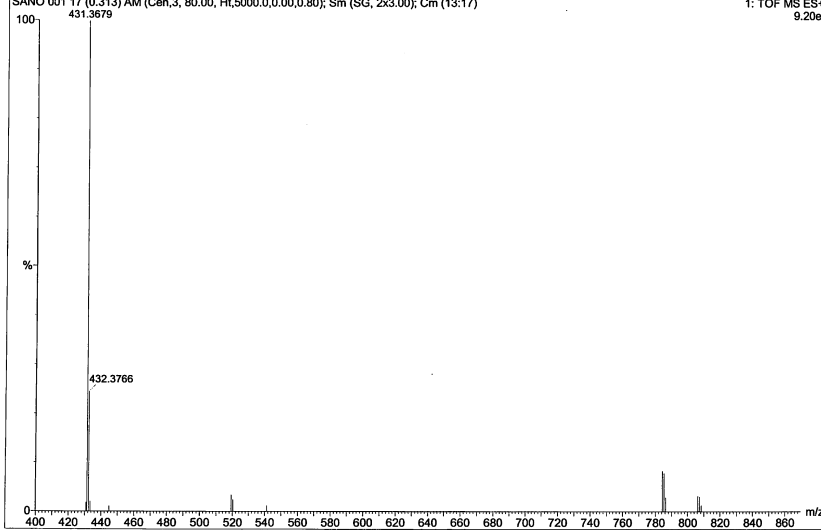

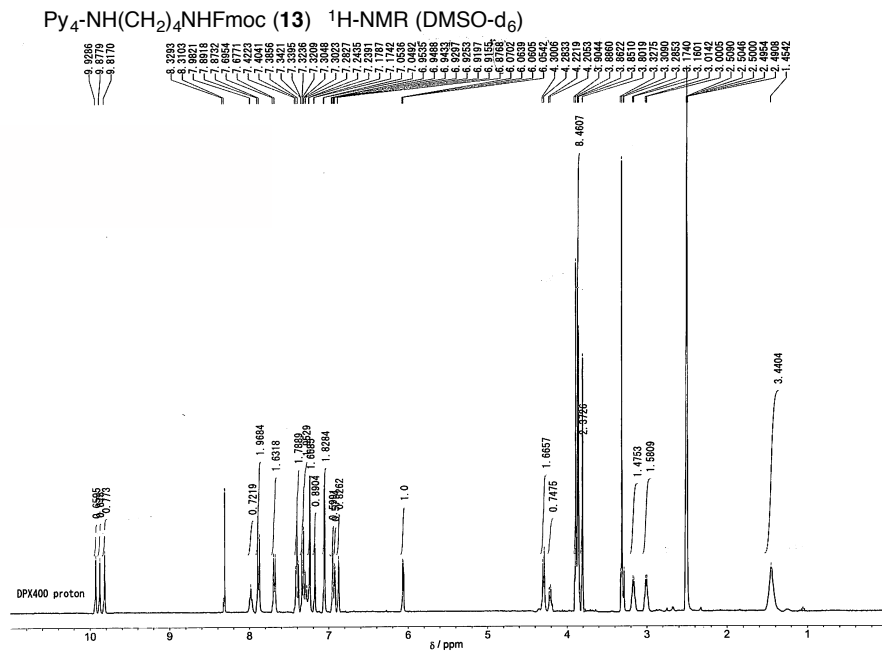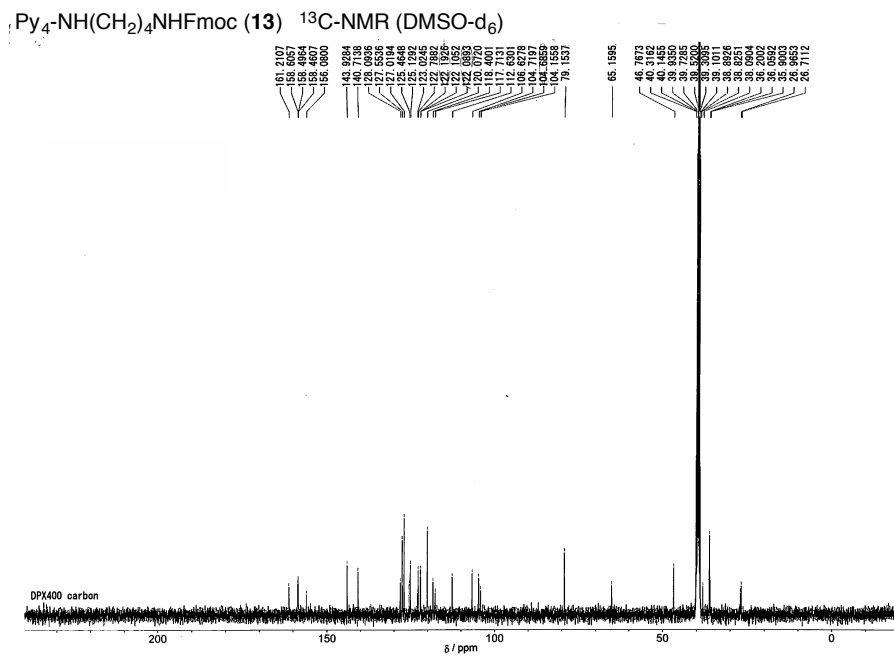

Py<sub>4</sub>-NH(CH<sub>2</sub>)<sub>5</sub>NHFmoc (14)  
**Elemental Composition Report**

**Single Mass Analysis (displaying only valid results)**

Tolerance = 10.0 PPM / DBE: min = -1.5, max = 40.0

Isotope cluster parameters: Separation = 1.0 Abundance = 1.0%

Monoisotopic Mass, Odd and Even Electron Ions

198 formula(e) evaluated with 5 results within limits (all results (up to 1000) for each mass)

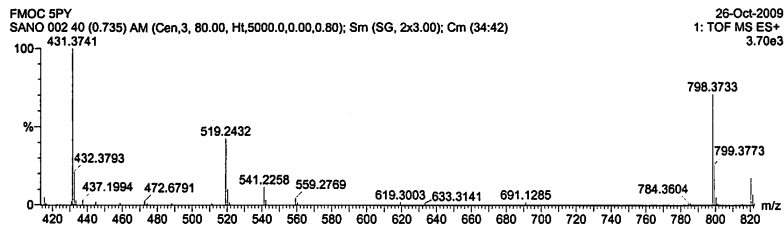

| Mass     | Calc. Mass | mDa  | PPM  | DBE  | Score | Formula          |
|----------|------------|------|------|------|-------|------------------|
| 798.3733 | 798.3728   | 0.5  | 0.7  | 25.5 | 2     | C44 H48 N9 O6    |
|          | 798.3757   | -2.4 | -3.0 | 26.0 | 3     | C49 H51 N4 O5 Na |
|          | 798.3704   | 2.9  | 3.7  | 22.5 | 1     | C42 H49 N9 O6 Na |
|          | 798.3781   | -4.8 | -6.1 | 29.0 | 5     | C51 H50 N4 O5    |
|          | 798.3655   | 7.7  | 9.7  | 29.5 | 4     | C50 H48 N5 O5    |

Py<sub>4</sub>-NH(CH<sub>2</sub>)<sub>5</sub>NHFmoc (14)

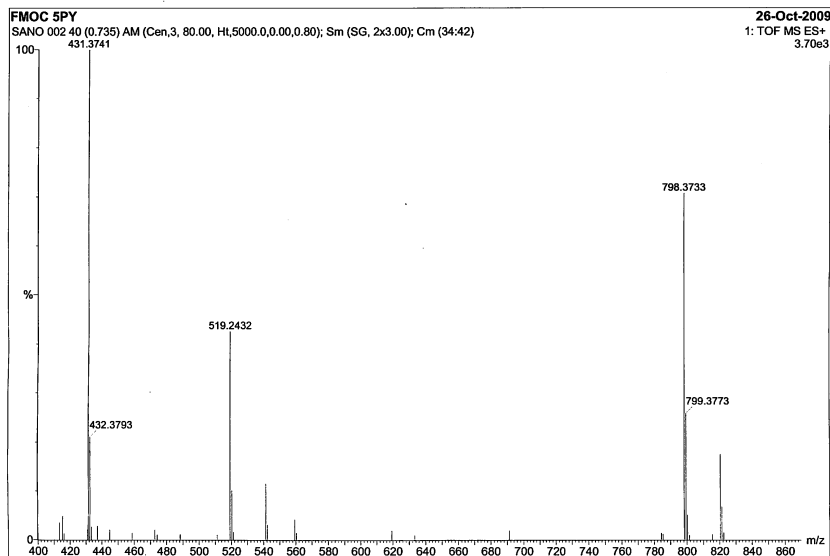



Py<sub>3</sub>-NH(CH<sub>2</sub>)<sub>4</sub>NHFmoc (15)

Elemental Composition Report

Single Mass Analysis (displaying only valid results)

Tolerance = 10.0 PPM / DBE: min = -1.5, max = 40.0

Isotope cluster parameters: Separation = 1.0 Abundance = 1.0%

Monoisotopic Mass, Odd and Even Electron Ions

26 formula(e) evaluated with 1 results within limits (all results (up to 1000) for each mass)

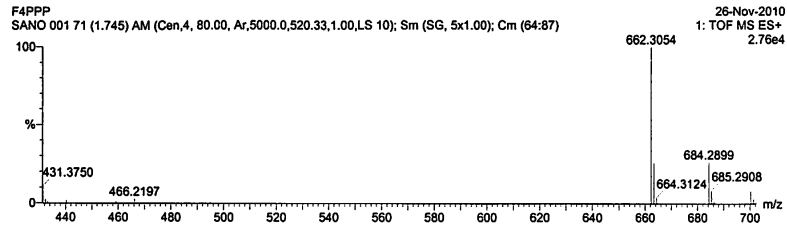

| Minimum: | 10.0       | 10.0 | -1.5 |      |       |               |
|----------|------------|------|------|------|-------|---------------|
| Maximum: |            |      | 40.0 |      |       |               |
| Mass     | Calc. Mass | mDa  | PPM  | DBE  | Score | Formula       |
| 662.3054 | 662.3091   | -3.7 | -5.5 | 21.5 | 1     | C37 H40 N7 O5 |

Py<sub>3</sub>-NH(CH<sub>2</sub>)<sub>4</sub>NHFmoc (15)

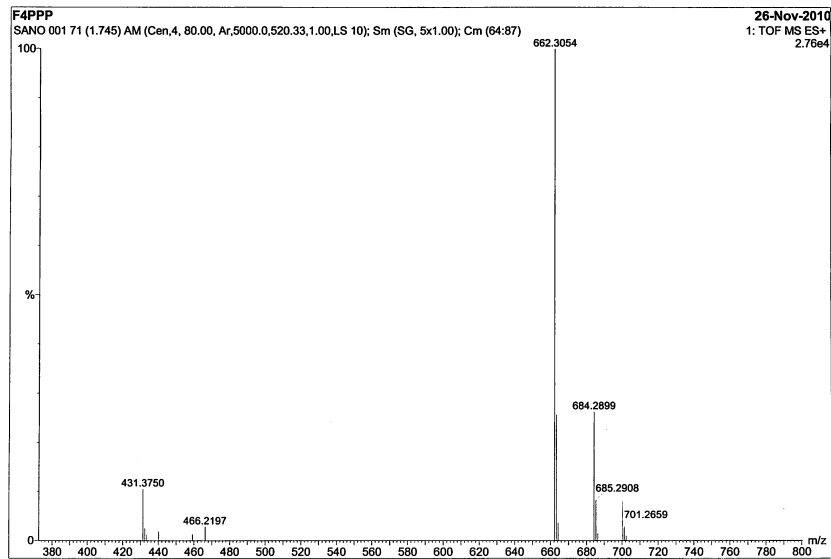



Py<sub>3</sub>-NH(CH<sub>2</sub>)<sub>4</sub>NHFmoc (15) <sup>1</sup>H-NMR (DMSO-d<sub>6</sub>)

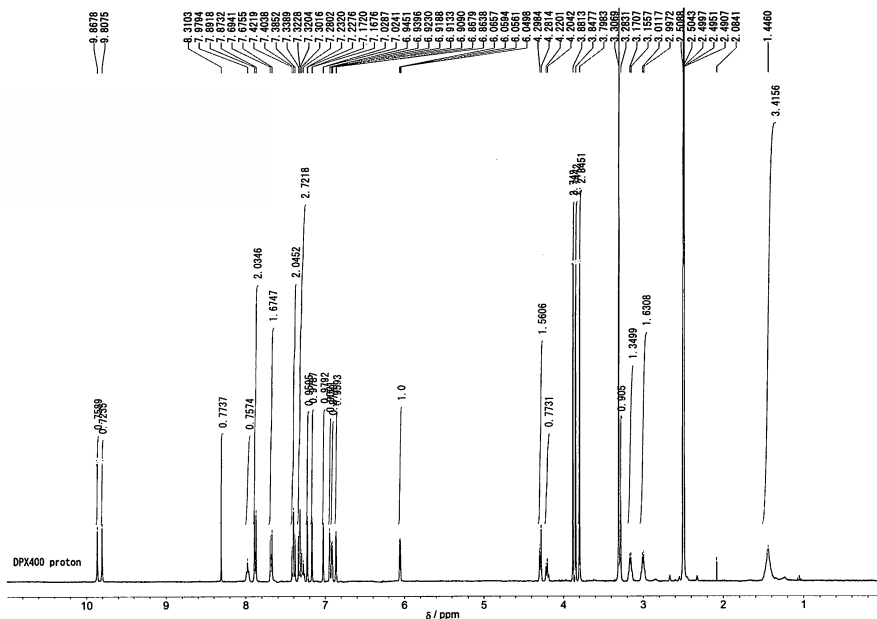

Py<sub>3</sub>-NH(CH<sub>2</sub>)<sub>4</sub>NHFmoc (15) <sup>13</sup>C-NMR (DMSO-d<sub>6</sub>)

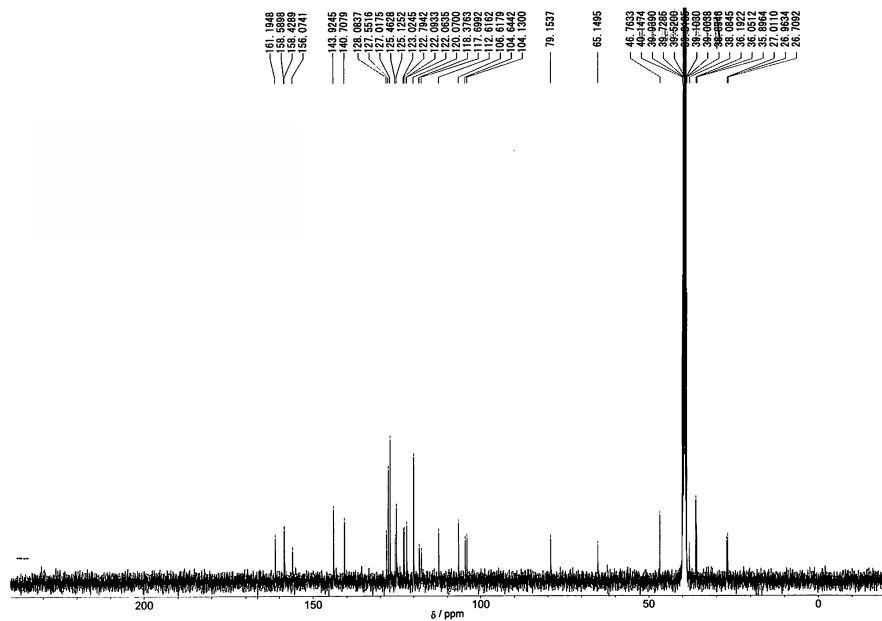

4-O<sub>2</sub>Nlm-OEt (21)

Elemental Composition Report

Single Mass Analysis (displaying only valid results)

Tolerance = 15.0 PPM / DBE: min = -1.5, max = 40.0

Isotope cluster parameters: Separation = 1.0 Abundance = 1.0%

Monoisotopic Mass, Odd and Even Electron Ions

27 formula(e) evaluated with 1 results within limits (all results (up to 1000) for each mass)

IM2  
SANO 002 12 (0.277) AM (Cen,4, 80.00, Ar,5000.0,415.25,1.00,LS 10); Sm (SG, 5x1.00); Cm (9:12)

03-Sep-2010  
1: TOF MS ES+  
3.87e3

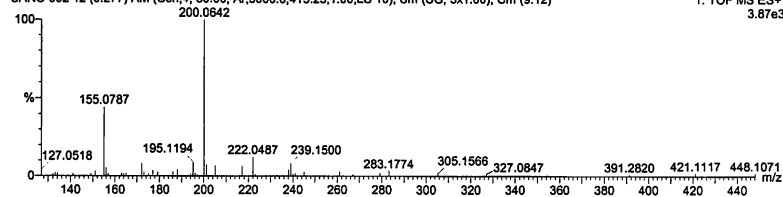

Minimum: 10.0 15.0 -1.5  
Maximum: 40.0

| Mass     | Calc. Mass | mDa  | PPM   | DBE | Score | Formula      |
|----------|------------|------|-------|-----|-------|--------------|
| 200.0642 | 200.0671   | -3.0 | -14.8 | 4.5 | 1     | C7 H10 N3 O4 |

4-O<sub>2</sub>Nlm-OEt (21)

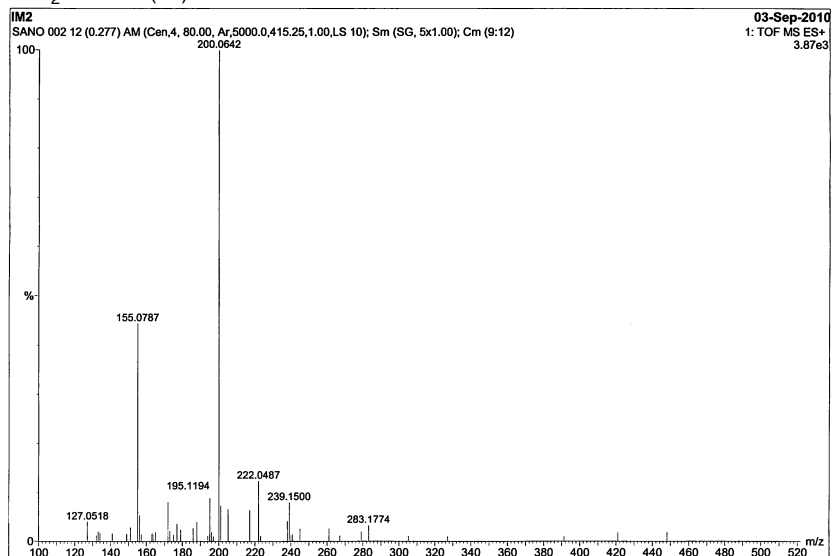

4-O<sub>2</sub>NIm-OEt (21) <sup>1</sup>H-NMR (DMSO-d<sub>6</sub>)

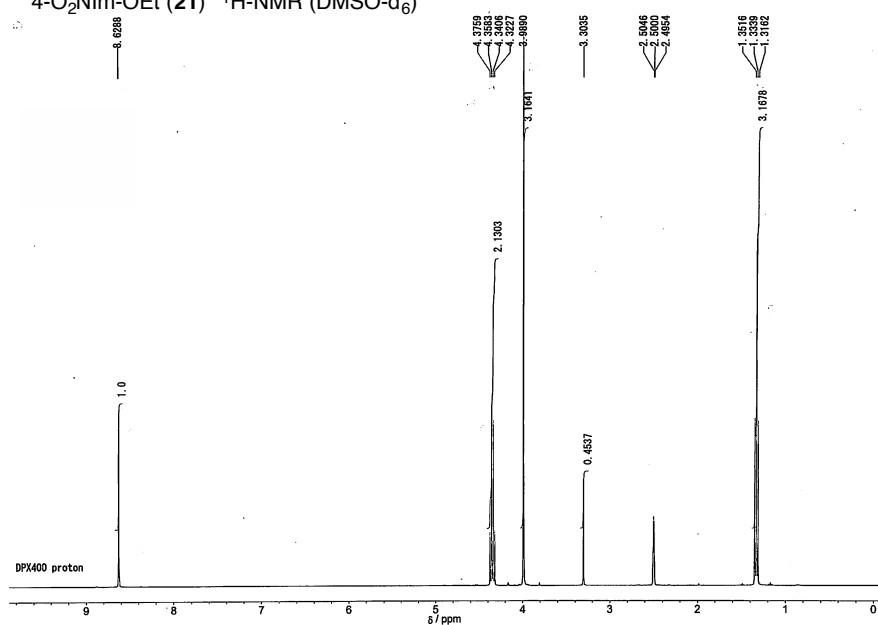

4-O<sub>2</sub>NIm-OEt (21) <sup>13</sup>C-NMR (DMSO-d<sub>6</sub>)

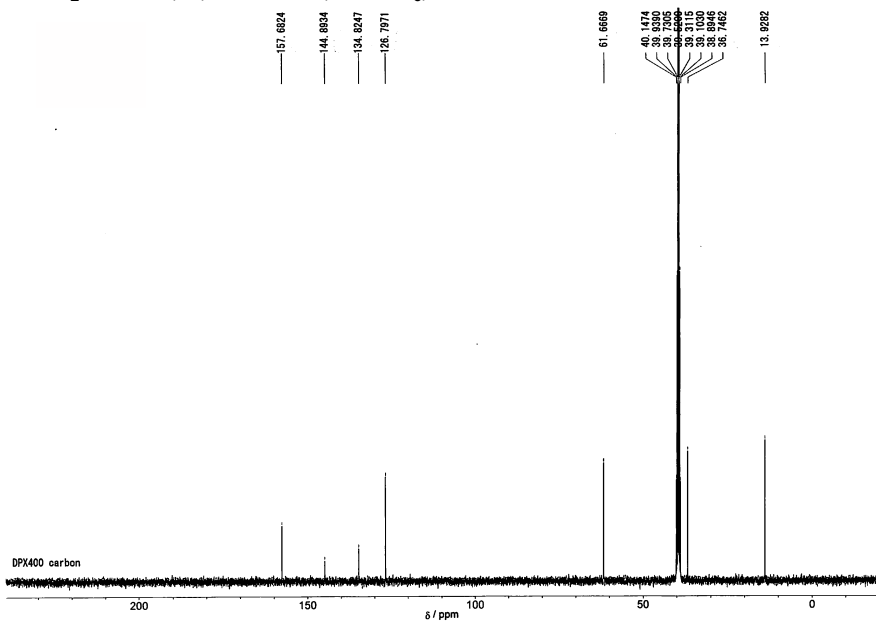

5-O<sub>2</sub>NIm-OEt (22)  
**Elemental Composition Report**

**Single Mass Analysis (displaying only valid results)**  
 Tolerance = 7.0 PPM / DBE: min = -0.5, max = 100.0  
 Isotope cluster parameters: Separation = 1.0 Abundance = 1.0%

Monoisotopic Mass, Even Electron Ions  
 213 formula(e) evaluated with 1 results within limits (all results (up to 1000) for each mass)

saka-120 by  
 SAKATA\_004 59 (1.359) AM (Cen,4, 80.00, Ar,5000.0,556.28,0.00,LS 10); Sm (SG, 2x3.00); Sb (1,40.00); Cm (32:63) 1: TOF MS ES+  
 2.70e4

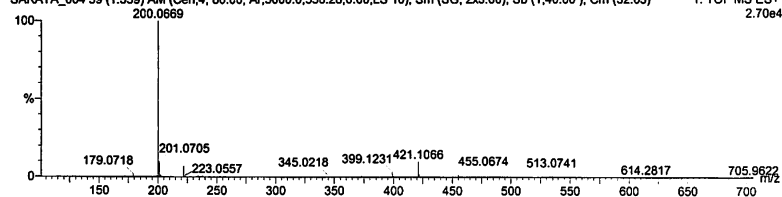

Minimum: 10.0 7.0 -0.5  
 Maximum: 100.0

| Mass     | Calc. Mass | mDa  | PPM  | DBE | Score | Formula      |
|----------|------------|------|------|-----|-------|--------------|
| 200.0669 | 200.0671   | -0.2 | -1.2 | 4.5 | 1     | C7 H10 N3 O4 |

5-O<sub>2</sub>NIm-OEt (22)

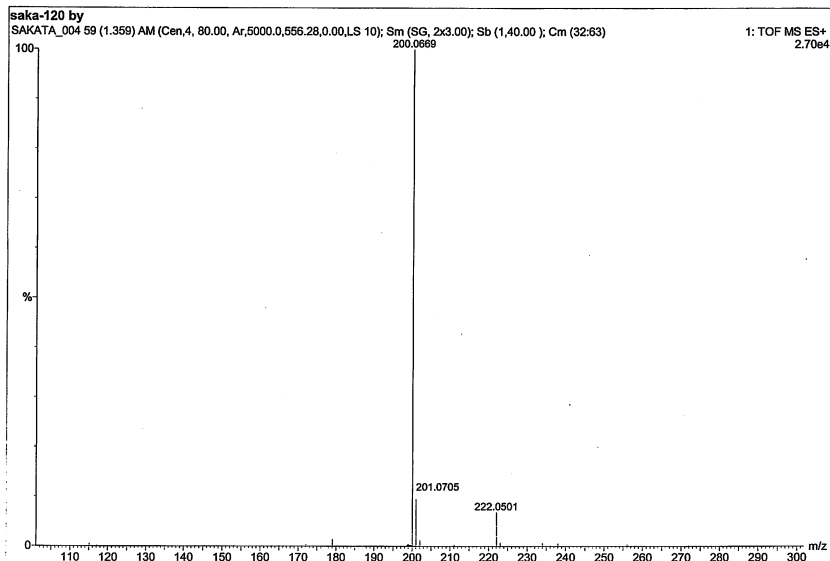

5-O<sub>2</sub>NIm-OEt (22) <sup>1</sup>H-NMR (DMSO-d<sub>6</sub>)

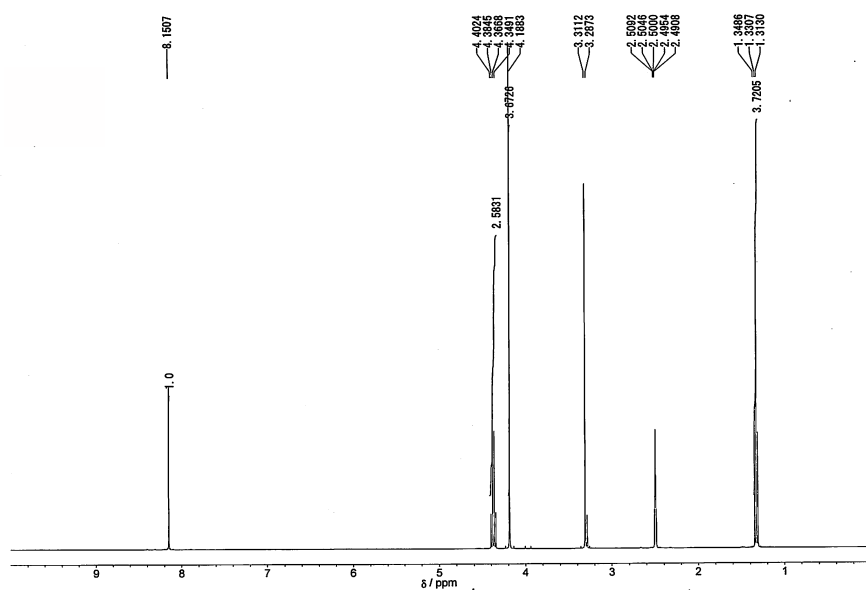

5-O<sub>2</sub>NIm-OEt (22) <sup>13</sup>C-NMR (DMSO-d<sub>6</sub>)

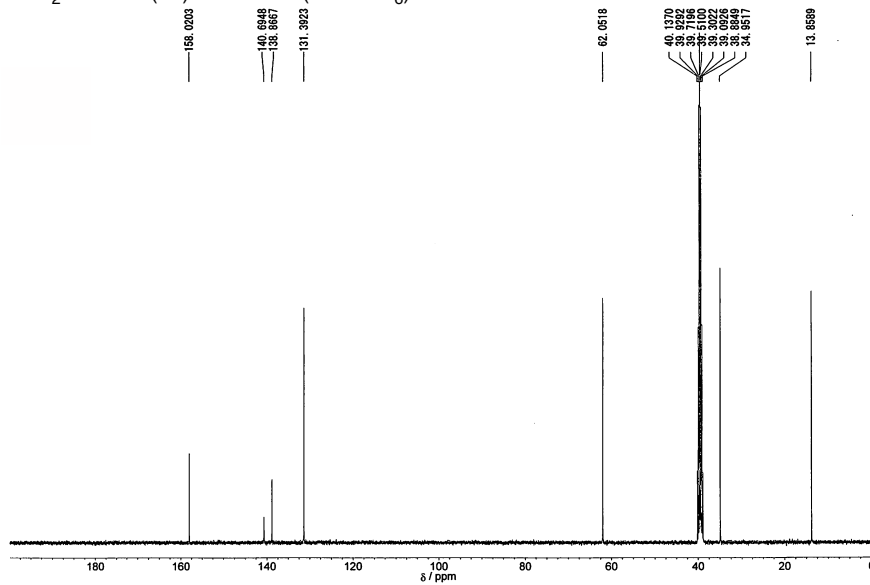

### Im-OH (23)

#### Elemental Composition Report

#### Single Mass Analysis

Tolerance = 20.0 PPM / DBE: min = -1.5, max = 300.0

Element prediction: Off

Number of isotope peaks used for i-FIT = 3

Monoisotopic Mass, Even Electron Ions

2 formula(e) evaluated with 1 results within limits (up to 20 closest results for each mass)

Elements Used:

C: 1-300 H: 1-1000 N: 2-2 O: 2-2

OTUKI-34

M-9682 55 (0.665) Cn (Cen,4, 80.00, Ar); Sm (SG, 2x3.00); Sb (1,40.00); Cm (22:56)

1: TOF MS ES+  
7.97e+003

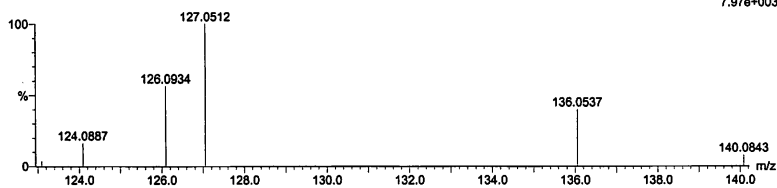

Minimum: 100.0 20.0 -1.5  
Maximum: 20.0 300.0

| Mass     | Calc. Mass | mDa | PPM | DBE | i-FIT | Formula     |
|----------|------------|-----|-----|-----|-------|-------------|
| 127.0512 | 127.0508   | 0.4 | 3.1 | 3.5 | n/a   | C5 H7 N2 O2 |

### Im-OH (23)

OTUKI-34

M-9682 55 (0.665) Cn (Cen,4, 80.00, Ar); Sm (SG, 2x3.00); Sb (1,40.00); Cm (22:56)

1: TOF MS ES+  
7.97e3

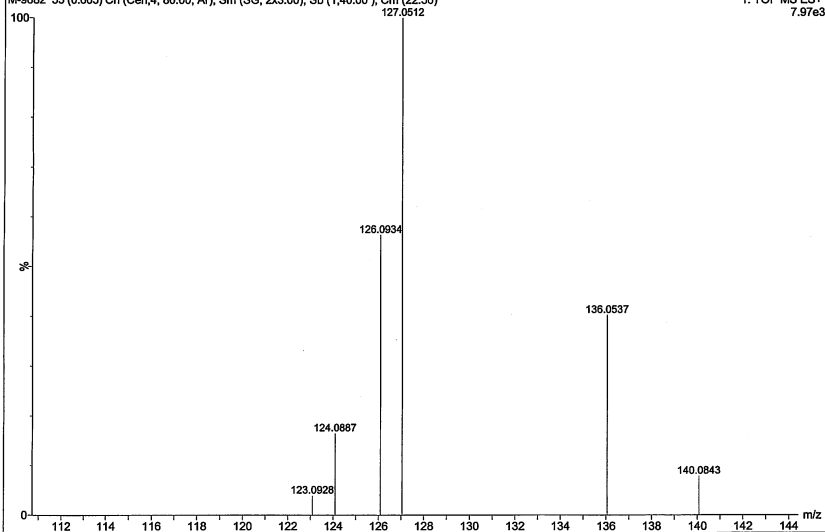

Im-OH (23) <sup>1</sup>H-NMR (CD<sub>3</sub>OD)

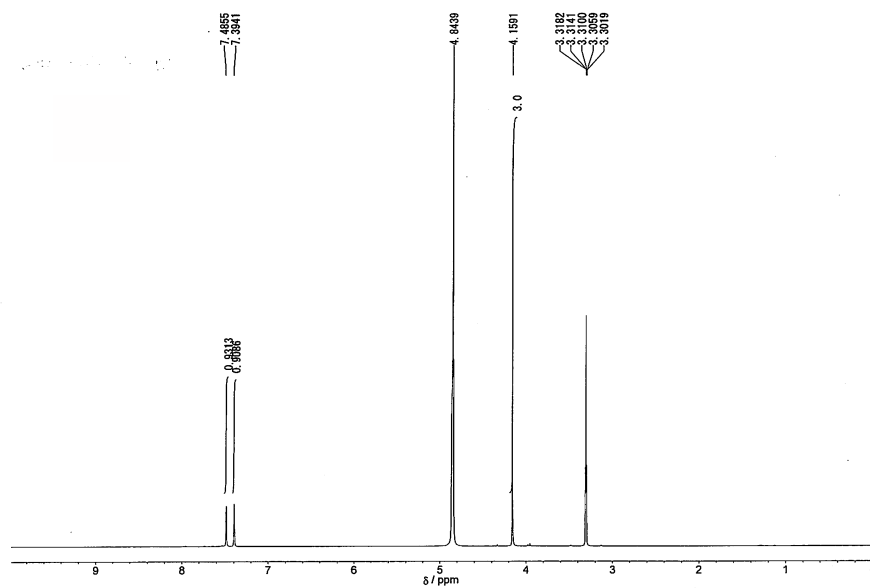

Im-OH (23) <sup>13</sup>C-NMR (CD<sub>3</sub>OD)

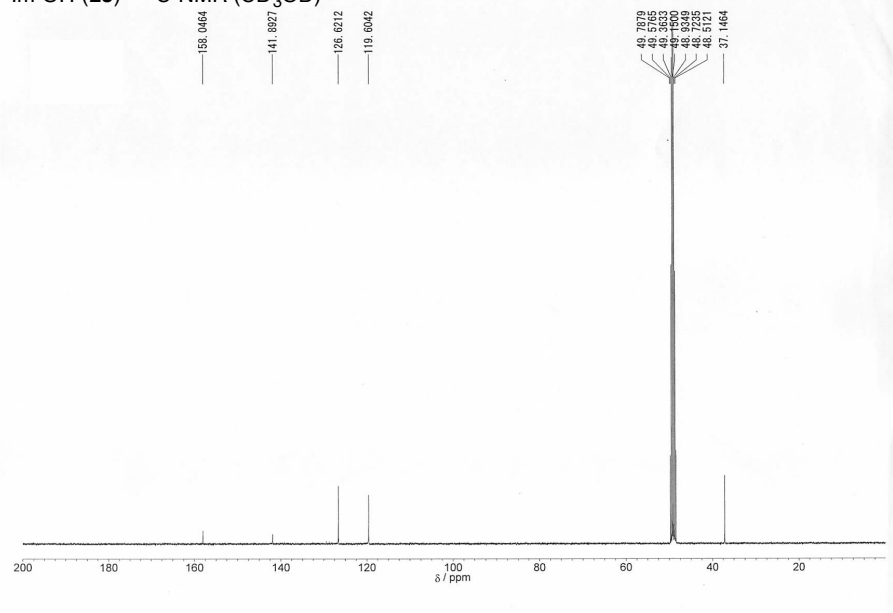

### 4-H<sub>2</sub>NIm-OEt (24)

#### Elemental Composition Report

#### Single Mass Analysis

Tolerance = 20.0 PPM / DBE: min = -1.5, max = 300.0

Element prediction: Off

Number of isotope peaks used for i-FIT = 3

Monoisotopic Mass, Even Electron Ions

2 formula(e) evaluated with 1 results within limits (up to 20 closest results for each mass)

Elements Used:

C: 1-300 H: 1-1000 N: 3-3 O: 2-2

aki-30

M-10184 15 (0.196) Cn (Cen,4, 80.00, Ar); Sm (SG, 2x3.00); Sb (1,40.00); Cm (15:41)

1: TOF MS ES+  
1.25e+004

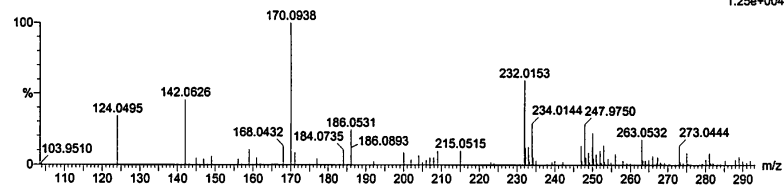

Minimum: -1.5  
Maximum: 100.0 20.0 300.0

| Mass     | Calc. Mass | mDa | PPM | DBE | i-FIT | Formula      |
|----------|------------|-----|-----|-----|-------|--------------|
| 170.0938 | 170.0930   | 0.8 | 4.7 | 3.5 | n/a   | C7 H12 N3 O2 |

### 4-H<sub>2</sub>NIm-OEt (24)

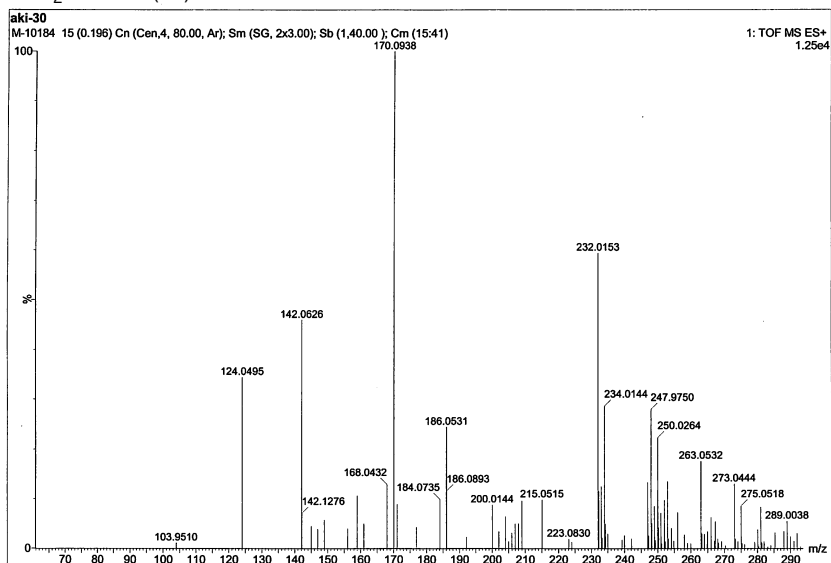



4-H<sub>2</sub>NIm-OEt (24) <sup>1</sup>H-NMR (CDCl<sub>3</sub>)

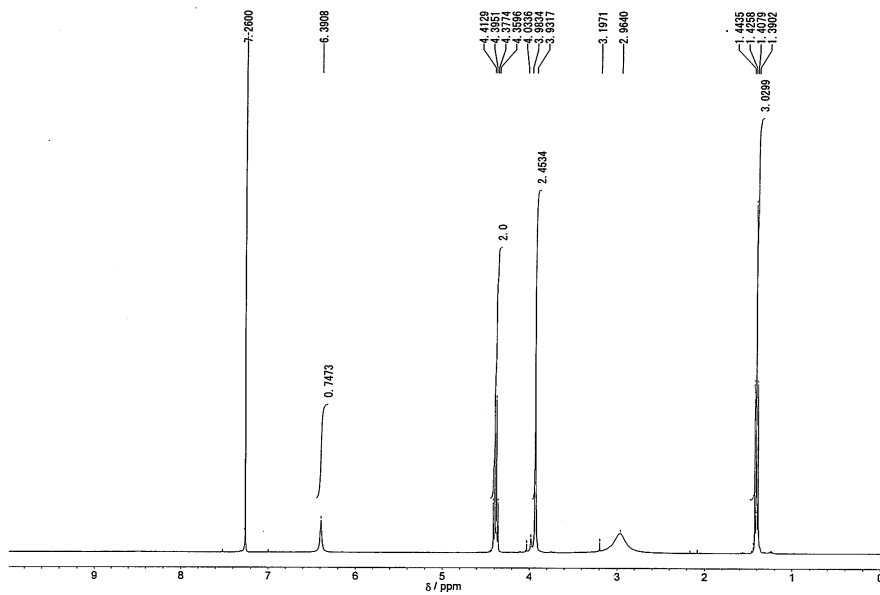

4-H<sub>2</sub>NIm-OEt (24) <sup>13</sup>C-NMR (CDCl<sub>3</sub>)

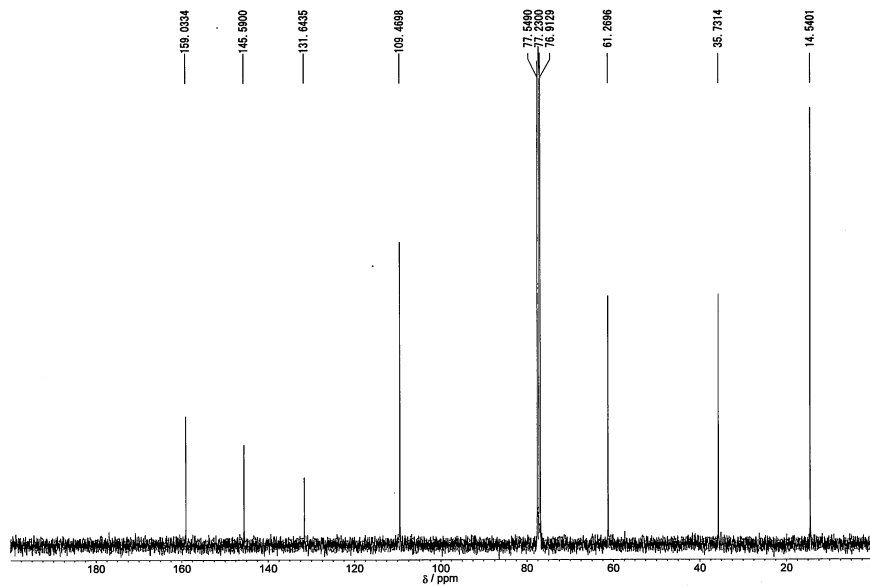

4-BocHNIm-OEt (25)  
Elemental Composition Report

Single Mass Analysis (displaying only valid results)  
Tolerance = 15.0 PPM / DBE: min = -1.5, max = 40.0  
Isotope cluster parameters: Separation = 1.0 Abundance = 1.0%

Monoisotopic Mass, Odd and Even Electron Ions  
12 formula(e) evaluated with 1 results within limits (all results (up to 1000) for each mass)

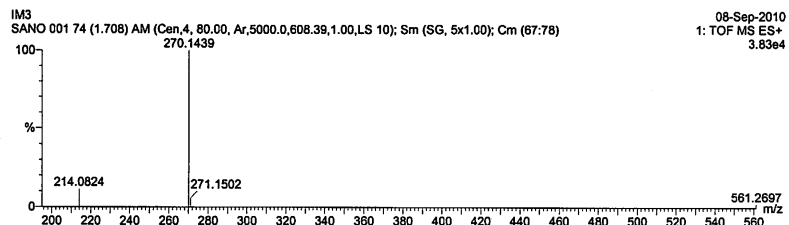

|          |            |      |      |      |       |               |
|----------|------------|------|------|------|-------|---------------|
| Minimum: |            |      |      | -1.5 |       |               |
| Maximum: |            | 10.0 | 15.0 | 40.0 |       |               |
| Mass     | Calc. Mass | mDa  | PPM  | DBE  | Score | Formula       |
| 270.1439 | 270.1454   | -1.5 | -5.4 | 4.5  | 1     | C12 H20 N3 O4 |

4-BocHNIm-OEt (25)

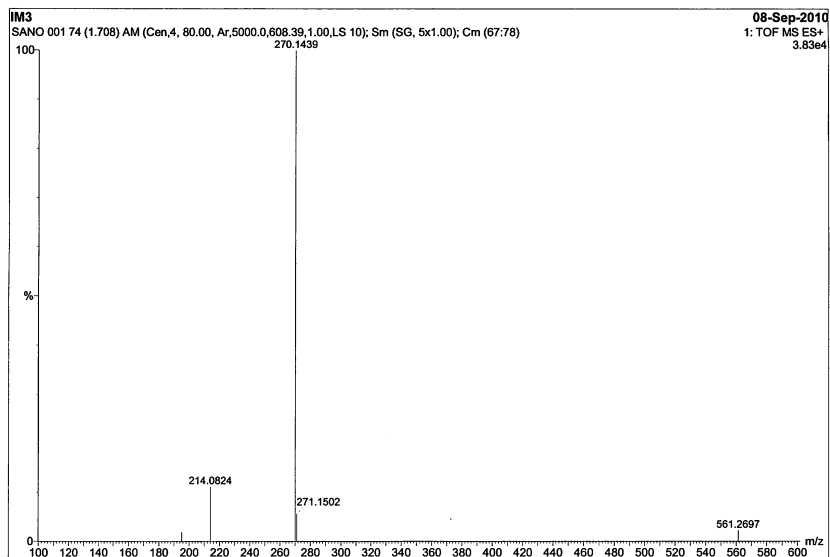

4-BocHNIm-OEt (25) <sup>1</sup>H-NMR (DMSO-d<sub>6</sub>)

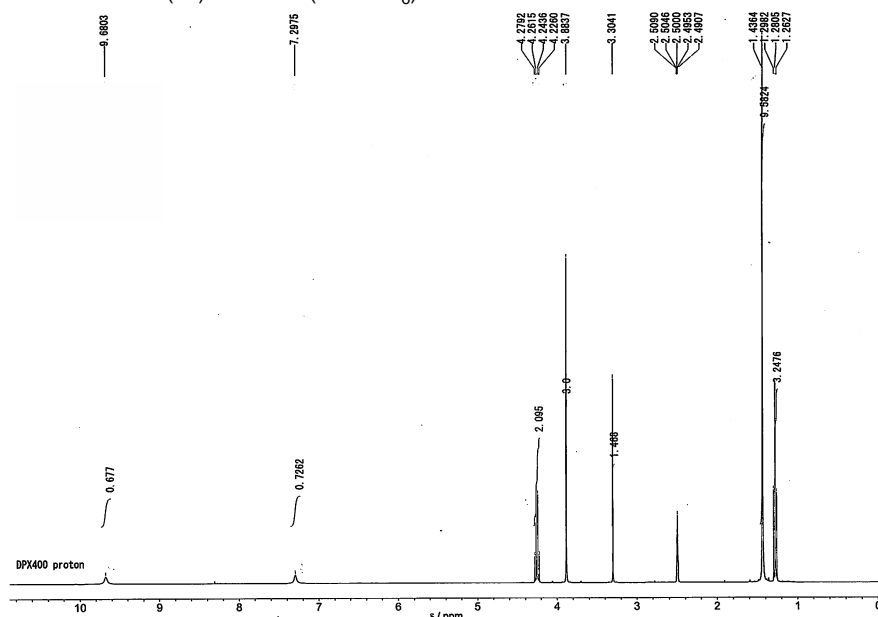

4-BocHNIm-OEt (25) <sup>13</sup>C-NMR (DMSO-d<sub>6</sub>)

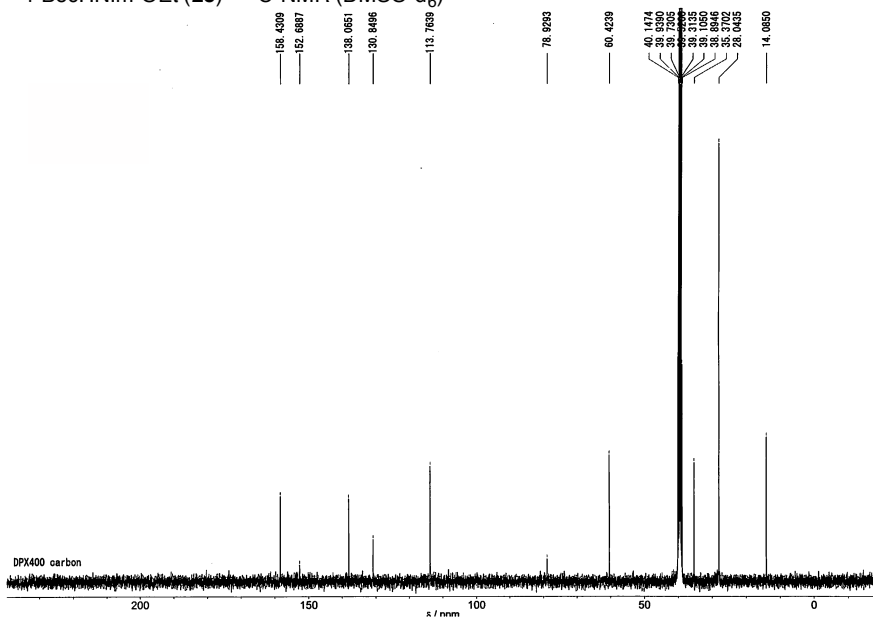

4-BocHNIm-OH (26)

Elemental Composition Report

Single Mass Analysis

Tolerance = 20.0 PPM / DBE: min = -1.5, max = 300.0

Element prediction: Off

Number of isotope peaks used for i-FIT = 3

Monoisotopic Mass, Even Electron Ions

3 formula(e) evaluated with 1 results within limits (up to 20 closest results for each mass)

Elements Used:

C: 1-300 H: 1-1000 N: 3-3 O: 4-4 Na: 1-1

aki-81

M-10182 78 (0.942) AM (Cen,4, 80.00, Ar,8500.0,556.28,0.00,LS 10); Sm (SG, 2x3.00); Sb (1,40.00); Cm (78:104)

1: TOF MS ES+  
3.91e+004

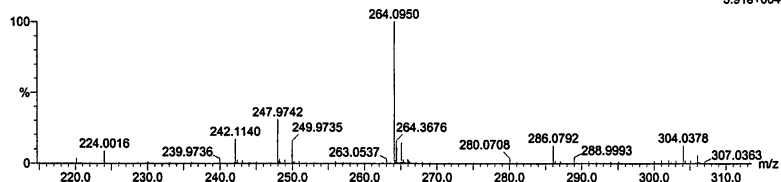

Minimum: -1.5  
Maximum: 100.0 20.0 300.0

| Mass     | Calc. Mass | mDa  | PPM  | DBE | i-FIT | Formula          |
|----------|------------|------|------|-----|-------|------------------|
| 264.0950 | 264.0960   | -1.0 | -3.8 | 4.5 | 70.3  | C10 H15 N3 O4 Na |

4-BocHNIm-OH (26)

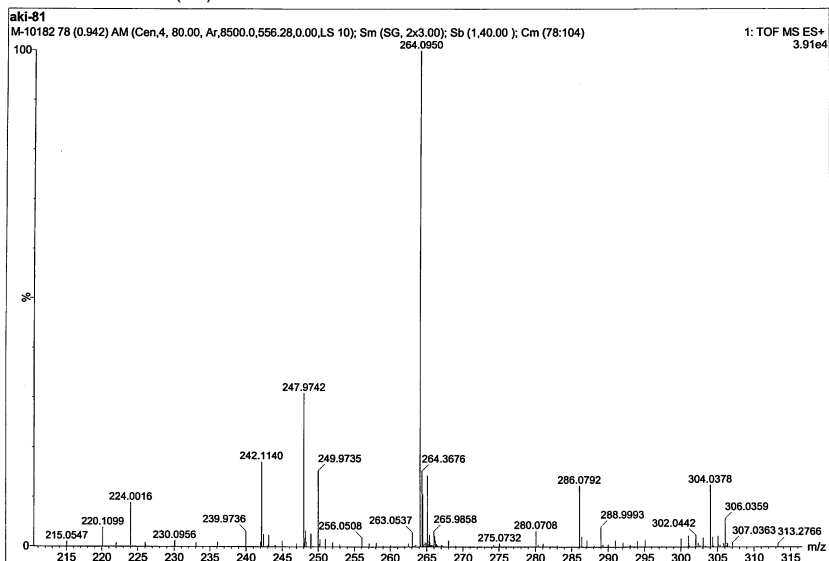

4-BocHNIm-OH (26) <sup>1</sup>H-NMR (DMSO-d<sub>6</sub>)

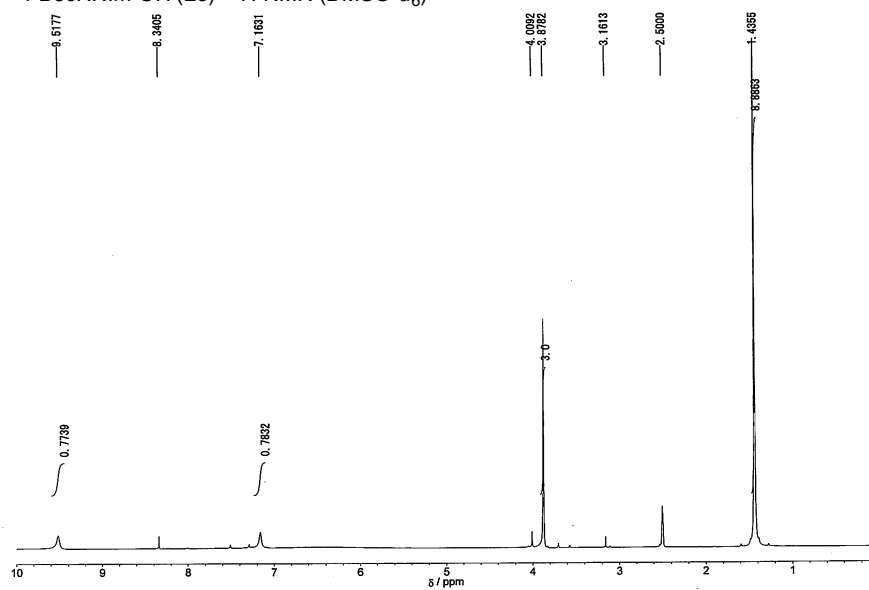

4-BocHNIm-OH (26) <sup>13</sup>C-NMR (DMSO-d<sub>6</sub>)

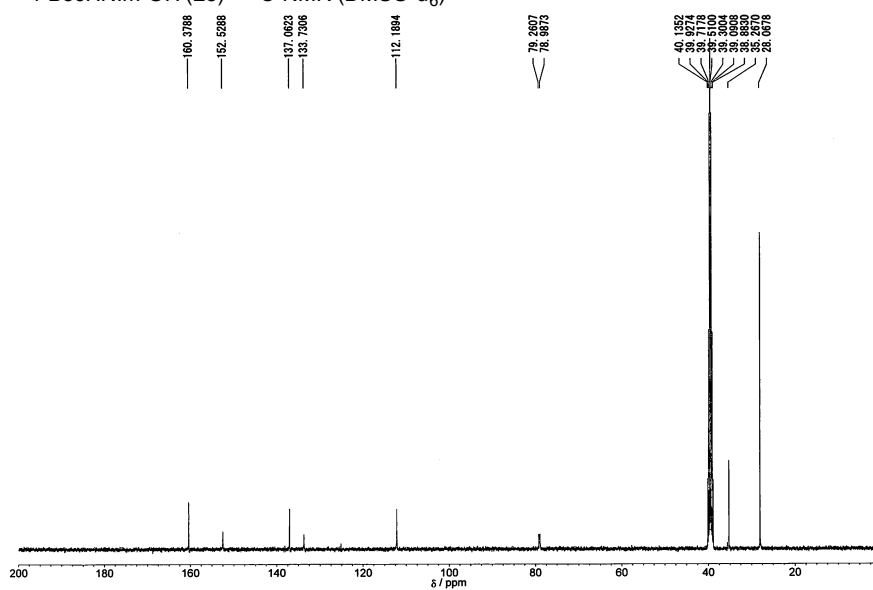

BocHNIm<sub>2</sub>-OEt (27)

Elemental Composition Report

Single Mass Analysis (displaying only valid results)

Tolerance = 20.0 mDa / DBE: min = -0.5, max = 100.0

Isotope cluster parameters: Separation = 1.0 Abundance = 1.0%

Monoisotopic Mass, Odd and Even Electron Ions

4 formula(e) evaluated with 1 results within limits (all results (up to 1000) for each mass)

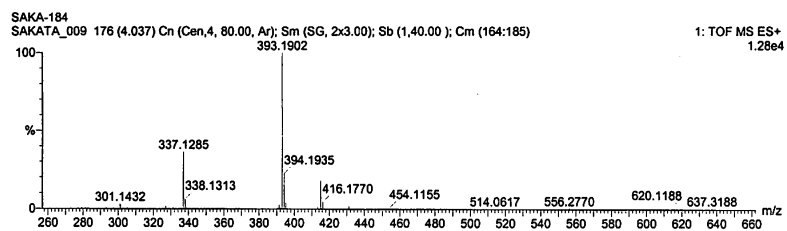

Minimum: 20.0 50.0 -0.5  
Maximum: 100.0 100.0

| Mass     | Calc. Mass | mDa | PPM | DBE | Score | Formula       |
|----------|------------|-----|-----|-----|-------|---------------|
| 393.1902 | 393.1886   | 1.5 | 3.8 | 8.5 | 1     | C17 H25 N6 O5 |

BocHNIm<sub>2</sub>-OEt (27)

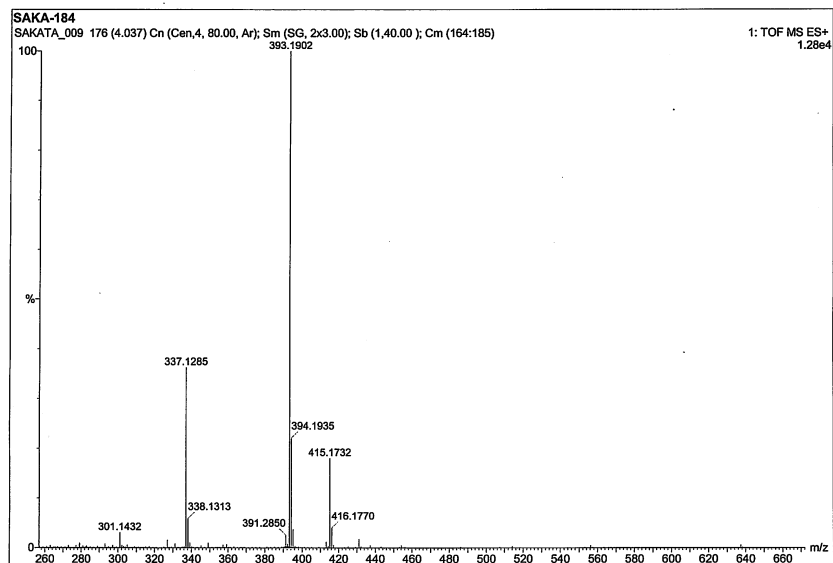

BocHNIm<sub>2</sub>-OEt (27) <sup>1</sup>H-NMR (CDCl<sub>3</sub>)

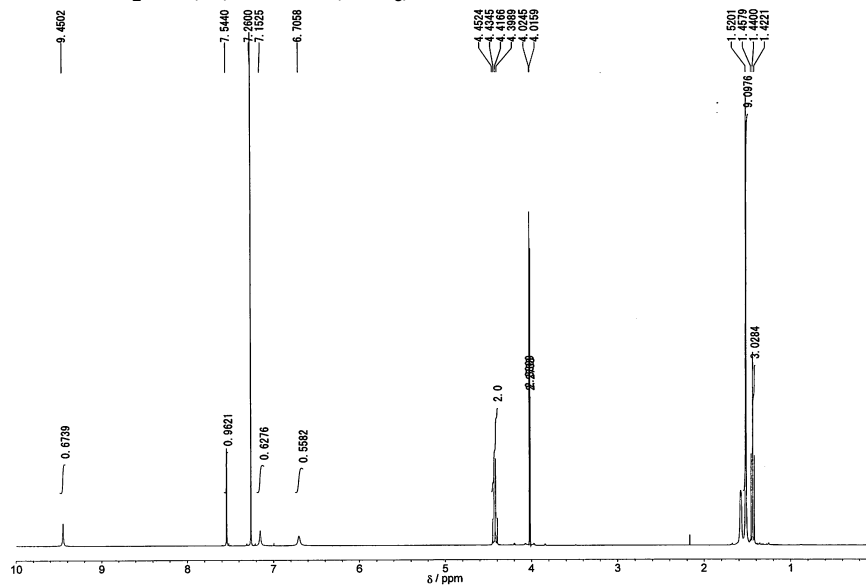

BocHNIm<sub>2</sub>-OEt (27) <sup>13</sup>C-NMR (CDCl<sub>3</sub>)

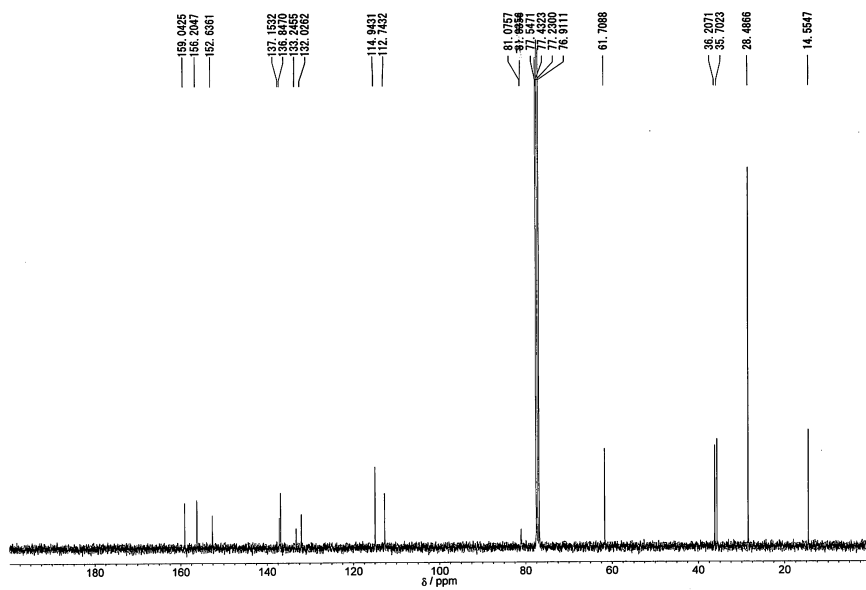

H<sub>2</sub>NIm<sub>2</sub>-OEt

### Elemental Composition Report

#### Single Mass Analysis (displaying only valid results)

Tolerance = 20.0 PPM / DBE: min = -0.5, max = 100.0

Isotope cluster parameters: Separation = 1.0 Abundance = 1.0%

Monoisotopic Mass, Odd and Even Electron Ions

31 formula(e) evaluated with 1 results within limits (all results (up to 1000) for each mass)

SAKA-199  
SAKATA\_007 614 (14.090) AM (Cen,4, 80.00, Ar,5000.0,556.28,0.00,LS 10); Sm (SG, 2x3.00); Sb (1,40.00); Cm (579:636) 1: TOF MS ES+  
4.40e4

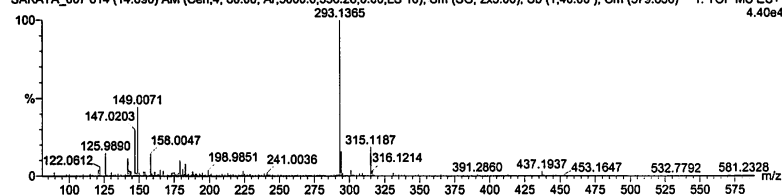

Minimum: -0.5  
Maximum: 100.0

| Mass     | Calc. Mass | mDa | PPM | DBE | Score | Formula       |
|----------|------------|-----|-----|-----|-------|---------------|
| 293.1365 | 293.1362   | 0.3 | 1.0 | 7.5 | 1     | C12 H17 N6 O3 |

H<sub>2</sub>NIm<sub>2</sub>-OEt

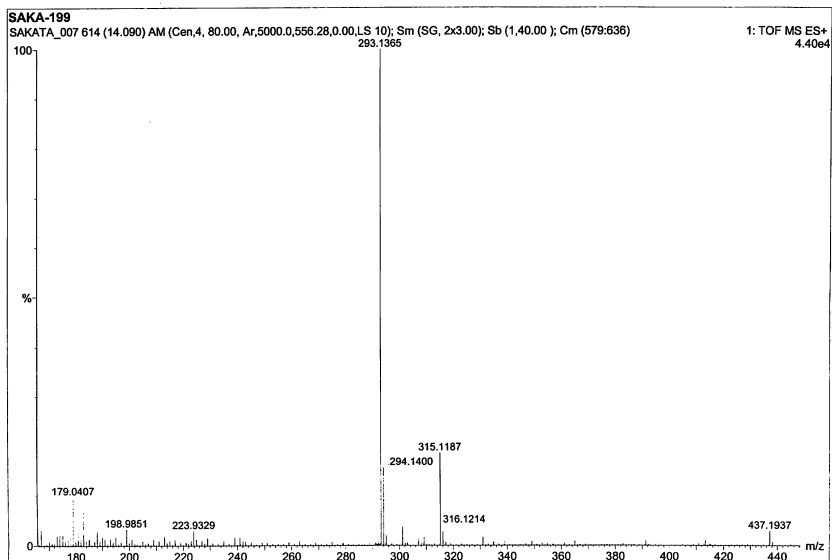



H<sub>2</sub>Nlm<sub>2</sub>-OEt <sup>1</sup>H-NMR (DMSO-d<sub>6</sub>)

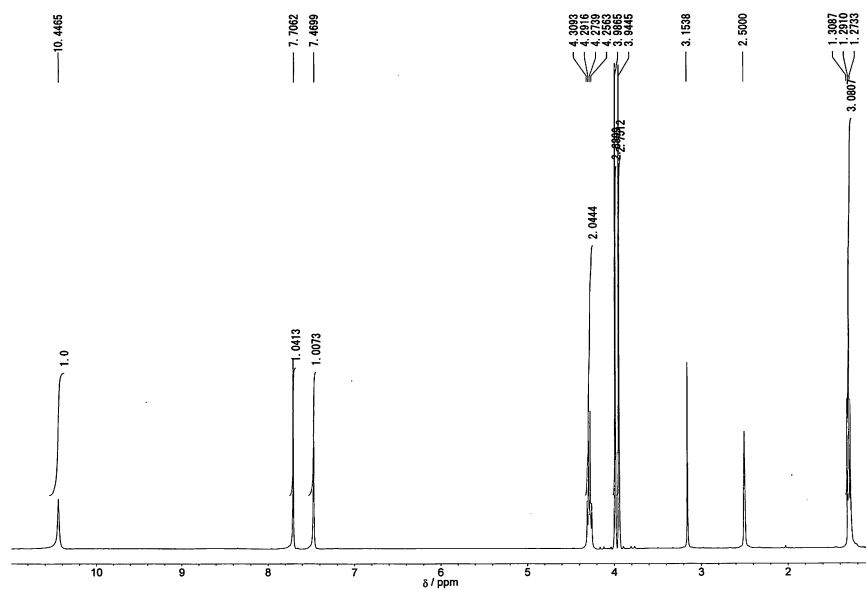

H<sub>2</sub>Nlm<sub>2</sub>-OEt <sup>13</sup>C-NMR (DMSO-d<sub>6</sub>)

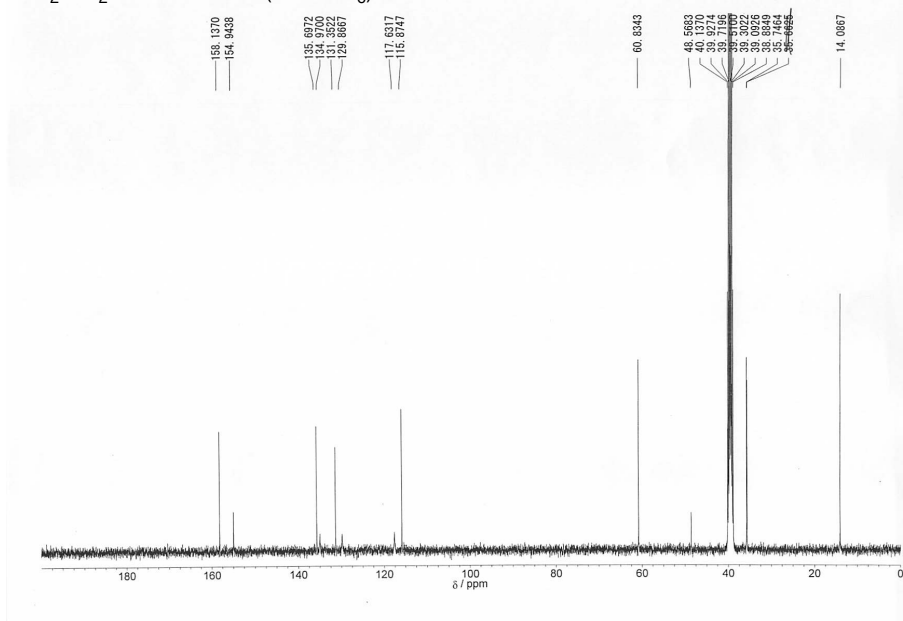

### Im<sub>3</sub>-OEt (28)

#### Elemental Composition Report

#### Single Mass Analysis (displaying only valid results)

Tolerance = 5.0 PPM / DBE: min = -0.5, max = 100.0

Isotope cluster parameters: Separation = 1.0 Abundance = 1.0%

Monoisotopic Mass, Even Electron Ions

42 formula(e) evaluated with 1 results within limits (all results (up to 1000) for each mass)

SAKA-194  
SAKATA\_008 599 (13.741) AM (Cen,4, 80.00, Ar,5000.0,556.28,0.00,LS 10); Sm (SG, 2x3.00); Sb (1,40.00 ); Cm (581:611) 1: TOF MS ES+  
2.85e4

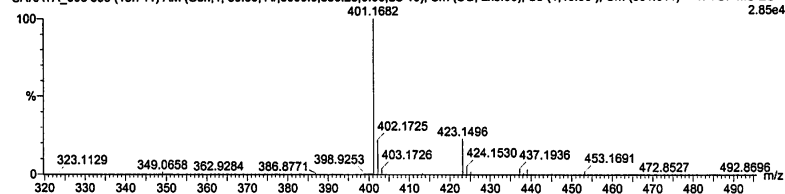

Minimum: -0.5  
Maximum: 100.0

| Mass     | Calc. Mass | mDa  | PPM  | DBE  | Score | Formula       |
|----------|------------|------|------|------|-------|---------------|
| 401.1682 | 401.1686   | -0.4 | -0.9 | 11.5 | 1     | C17 H21 N8 O4 |

### Im<sub>3</sub>-OEt (28)

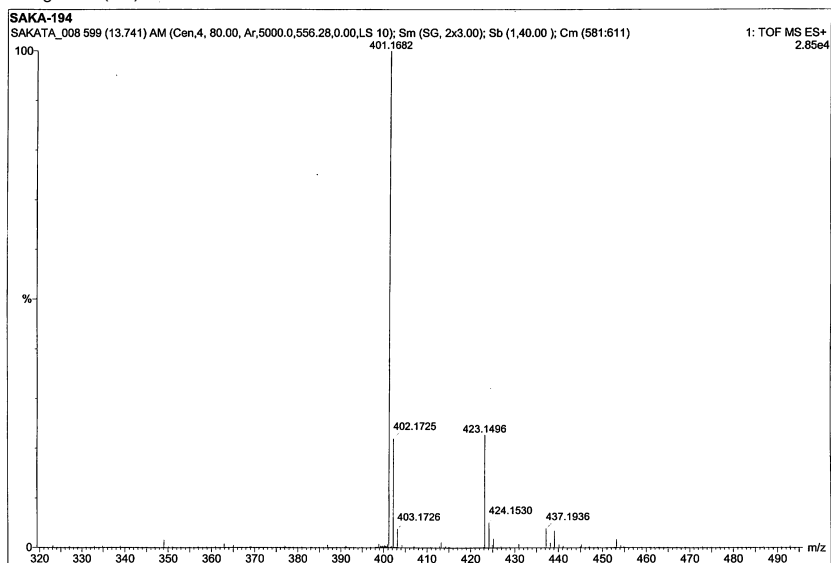

Im<sub>3</sub>-OEt (28) <sup>1</sup>H-NMR (CDCl<sub>3</sub>)

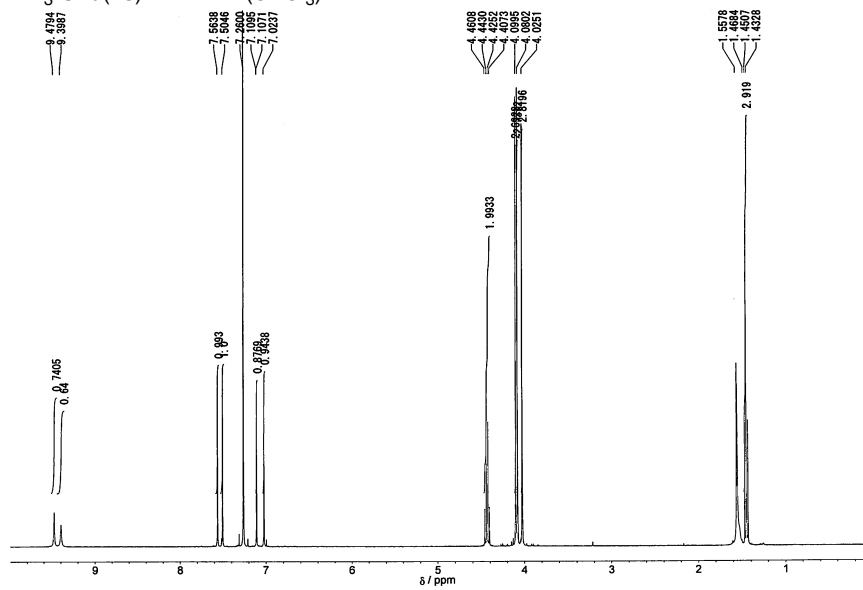

Im<sub>3</sub>-OEt (28) <sup>13</sup>C-NMR (CDCl<sub>3</sub>)

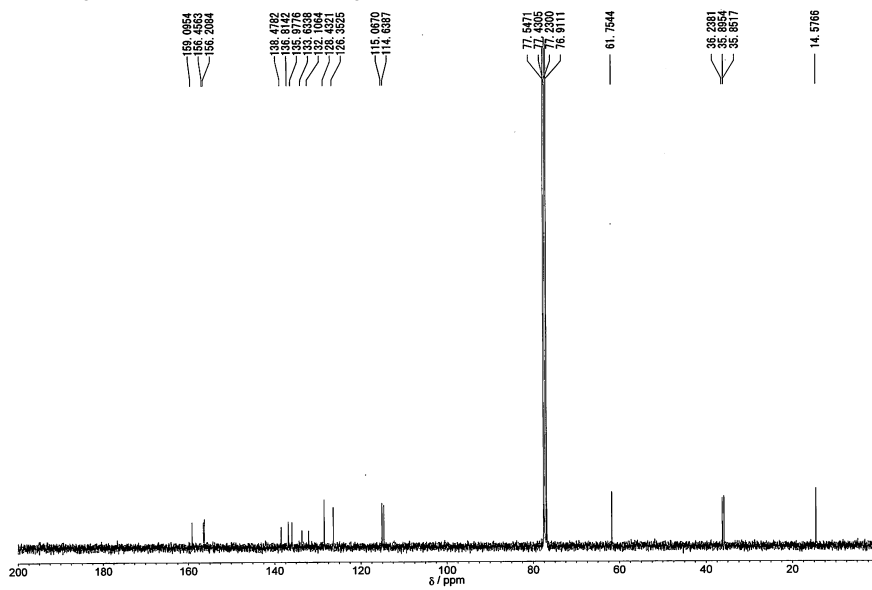

Im<sub>3</sub>-OH (carboxylic acid)  
**Elemental Composition Report**

**Single Mass Analysis**

Tolerance = 1000.0 mDa / DBE: min = 0.5, max = 500.0  
 Element prediction: Off  
 Number of isotope peaks used for i-FIT = 4

Monoisotopic Mass, Even Electron Ions  
 1 formula(e) evaluated with 1 results within limits (all results (up to 1000) for each mass)

Elements Used:

C: 0-15 H: 0-17 N: 8-8 O: 4-4

saka-224

SAKATA 009 93 (1.116) Cn (Cen,4, 80.00, Ar); Sm (SG, 2x3.00); Cm (71:113)

1: TOF MS ES+  
 1.82e+005

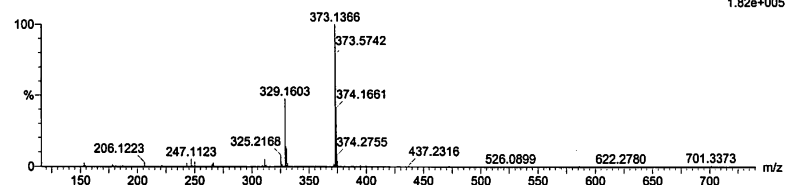

Minimum: 1000.0 20.0 0.5  
 Maximum: 500.0

| Mass | Calc. Mass | mDa | PPM | DBE | i-FIT | Formula |
|------|------------|-----|-----|-----|-------|---------|
|------|------------|-----|-----|-----|-------|---------|

Im<sub>3</sub>-OH (carboxylic acid)

SAKATA 009 93 (1.116) Cn (Cen,4, 80.00, Ar); Sm (SG, 2x3.00); Cm (71:113)

1: TOF MS ES+  
 1.82e5

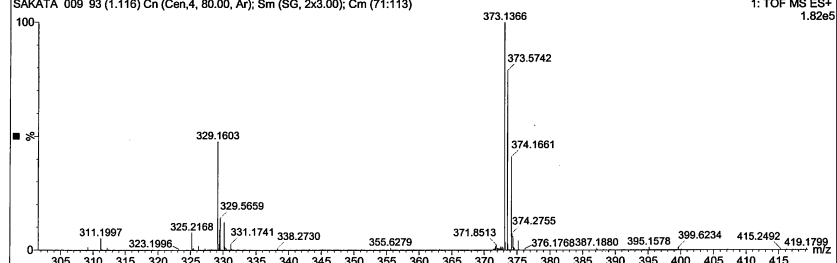

Im<sub>3</sub>-OH (carboxylic acid) <sup>1</sup>H-NMR (DMSO-d<sub>6</sub>)

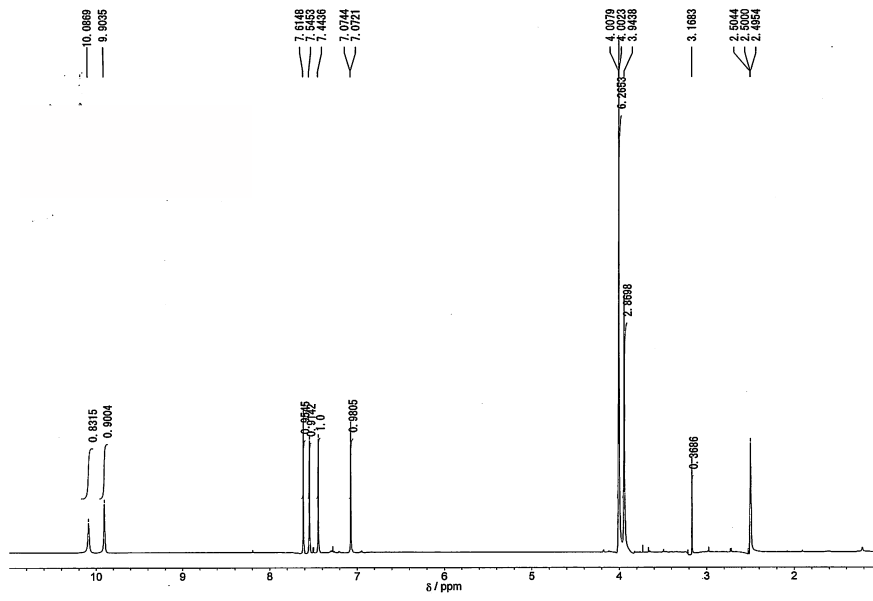

Im<sub>3</sub>-OH (carboxylic acid) <sup>13</sup>C-NMR (DMSO-d<sub>6</sub>)

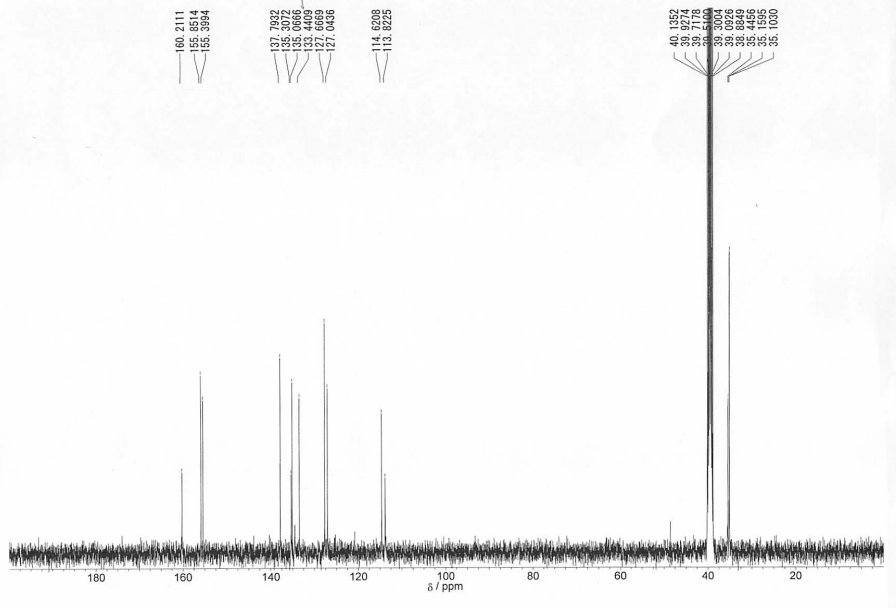

**Im<sub>3</sub>-NH(CH<sub>2</sub>)<sub>3</sub>NHFmoc (29)**  
**Elemental Composition Report**

**Single Mass Analysis (displaying only valid results)**

Tolerance = 20.0 mDa / DBE: min = -0.5, max = 100.0

Isotope cluster parameters: Separation = 1.0 Abundance = 1.0%

Monoisotopic Mass, Odd and Even Electron Ions

7 formula(e) evaluated with 1 results within limits (all results (up to 1000) for each mass)

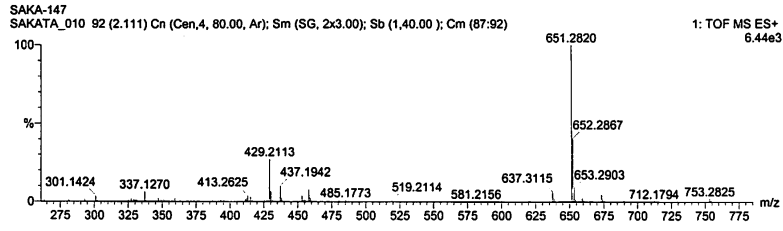

Minimum: -0.5  
 Maximum: 20.0 50.0 100.0

| Mass     | Calc. Mass | mDa | PPM | DBE  | Score | Formula        |
|----------|------------|-----|-----|------|-------|----------------|
| 651.2820 | 651.2792   | 2.9 | 4.4 | 21.5 | 1     | C33 H35 N10 O5 |

**Im<sub>3</sub>-NH(CH<sub>2</sub>)<sub>3</sub>NHFmoc (29)**

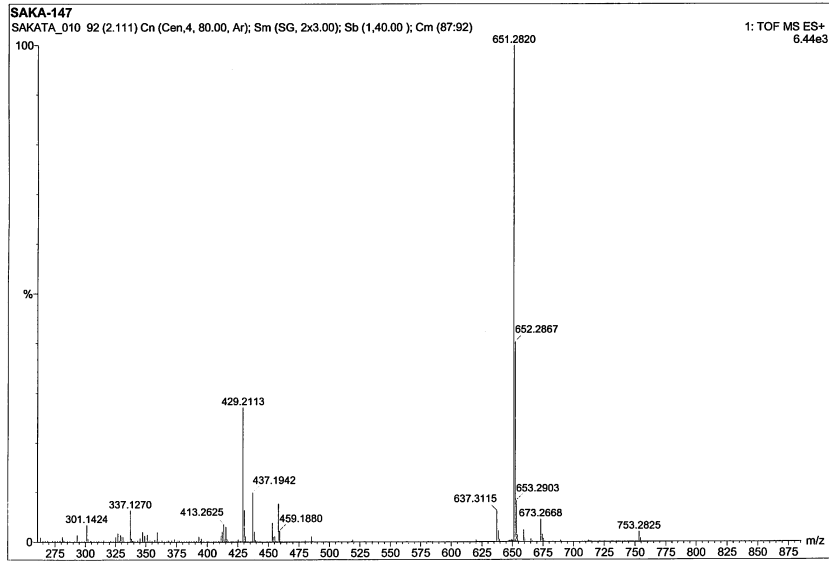

$\text{Im}_3\text{-NH}(\text{CH}_2)_3\text{NHFmoc}$  (**29**)  $^1\text{H-NMR}$  ( $\text{DMSO-d}_6$ )

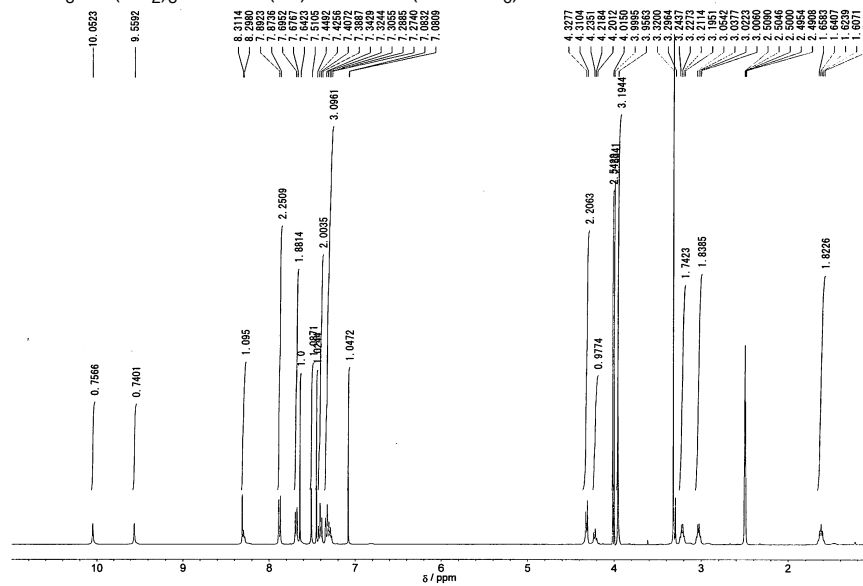

$\text{Im}_3\text{-NH}(\text{CH}_2)_3\text{NHFmoc}$  (**29**)  $^{13}\text{C-NMR}$  ( $\text{CDCl}_3$ )

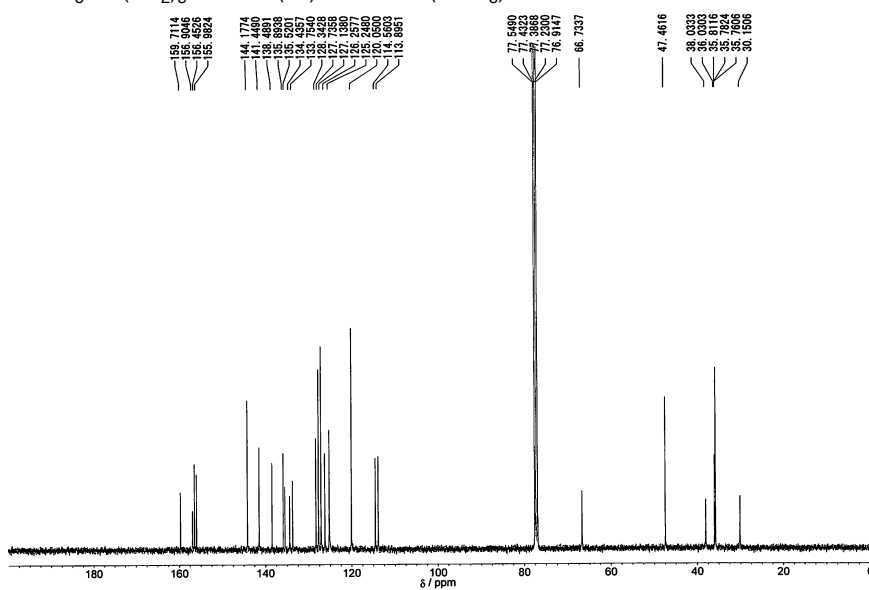

**Im<sub>3</sub>-NH(CH<sub>2</sub>)<sub>4</sub>NHFmoc (30)**  
**Elemental Composition Report**

**Single Mass Analysis (displaying only valid results)**  
 Tolerance = 20.0 mDa / DBE: min = -0.5, max = 100.0  
 Isotope cluster parameters: Separation = 1.0 Abundance = 1.0%

Monoisotopic Mass, Odd and Even Electron Ions  
 7 formula(e) evaluated with 1 results within limits (all results (up to 1000) for each mass)

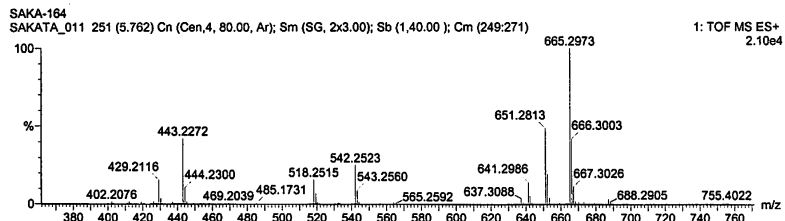

Minimum: 20.0 50.0 -0.5  
 Maximum: 100.0

| Mass     | Calc. Mass | mDa | PPM | DBE  | Score | Formula        |
|----------|------------|-----|-----|------|-------|----------------|
| 665.2973 | 665.2948   | 2.5 | 3.7 | 21.5 | 1     | C34 H37 N10 O5 |

**Im<sub>3</sub>-NH(CH<sub>2</sub>)<sub>4</sub>NHFmoc (30)**

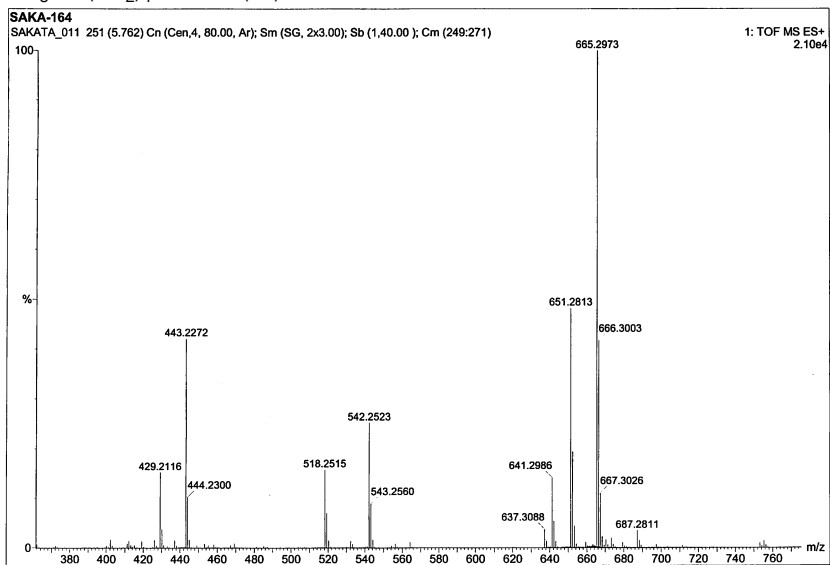



$\text{Im}_3\text{-NH}(\text{CH}_2)_4\text{NHFmoc}$  (**30**)  $^1\text{H-NMR}$  ( $\text{DMSO-d}_6$ )

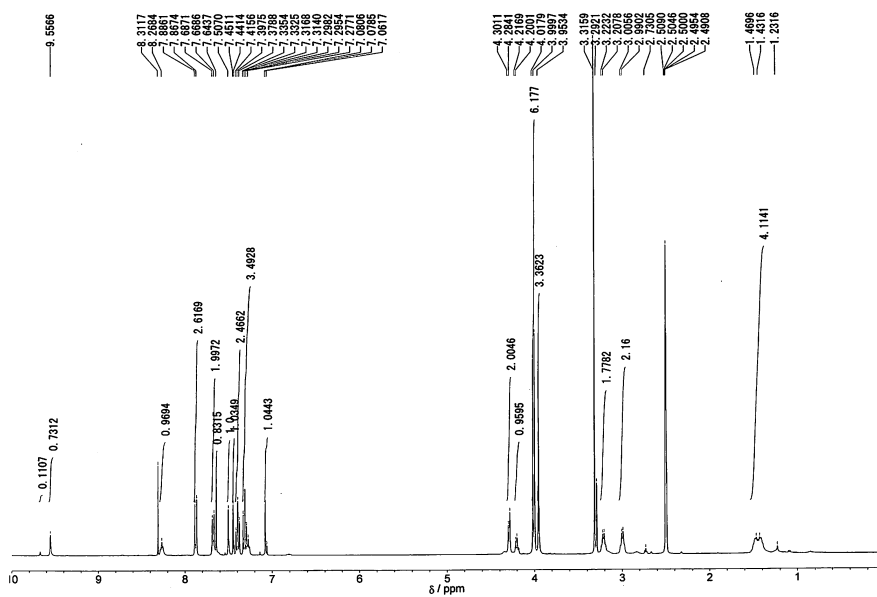

$\text{Im}_3\text{-NH}(\text{CH}_2)_4\text{NHFmoc}$  (**30**)  $^{13}\text{C-NMR}$  ( $\text{CDCl}_3$ )

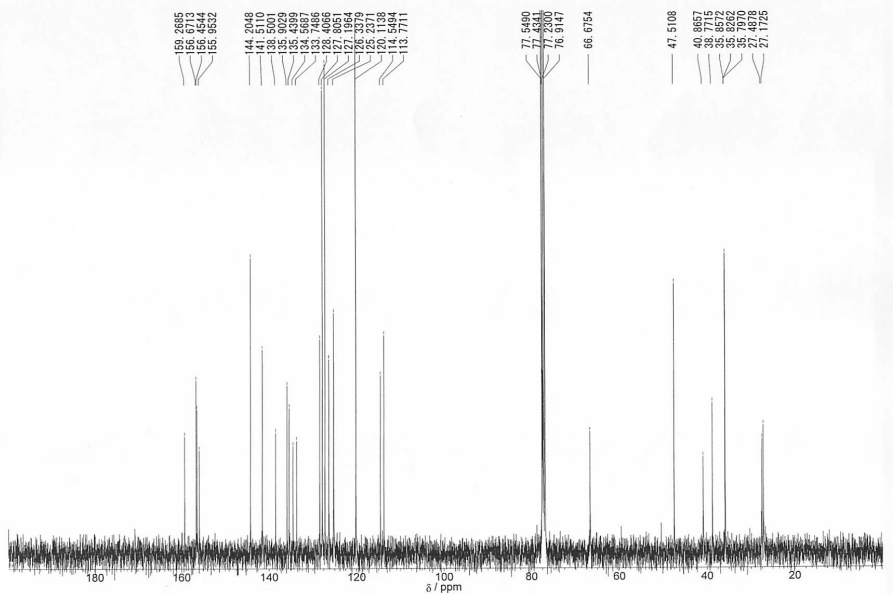

**Im<sub>3</sub>-NH(CH<sub>2</sub>)<sub>5</sub>NHFmoc (31)**

**Elemental Composition Report**

**Single Mass Analysis (displaying only valid results)**

Tolerance = 20.0 mDa / DBE: min = -0.5, max = 100.0

Isotope cluster parameters: Separation = 1.0 Abundance = 1.0%

Monoisotopic Mass, Odd and Even Electron Ions

7 formula(e) evaluated with 1 results within limits (all results (up to 1000) for each mass)

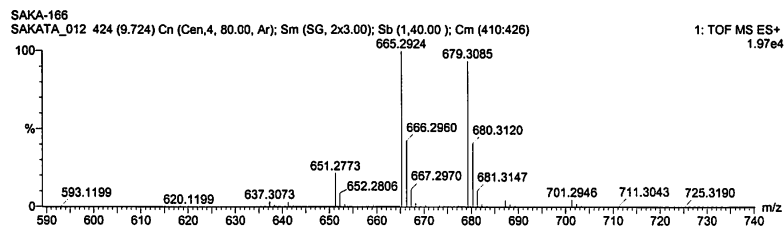

Minimum: -0.5  
Maximum: 100.0

| Mass     | Calc. Mass | mDa  | PPM  | DBE  | Score | Formula        |
|----------|------------|------|------|------|-------|----------------|
| 679.3085 | 679.3105   | -2.0 | -3.0 | 21.5 | 1     | C35 H39 N10 O5 |

**Im<sub>3</sub>-NH(CH<sub>2</sub>)<sub>5</sub>NHFmoc (31)**

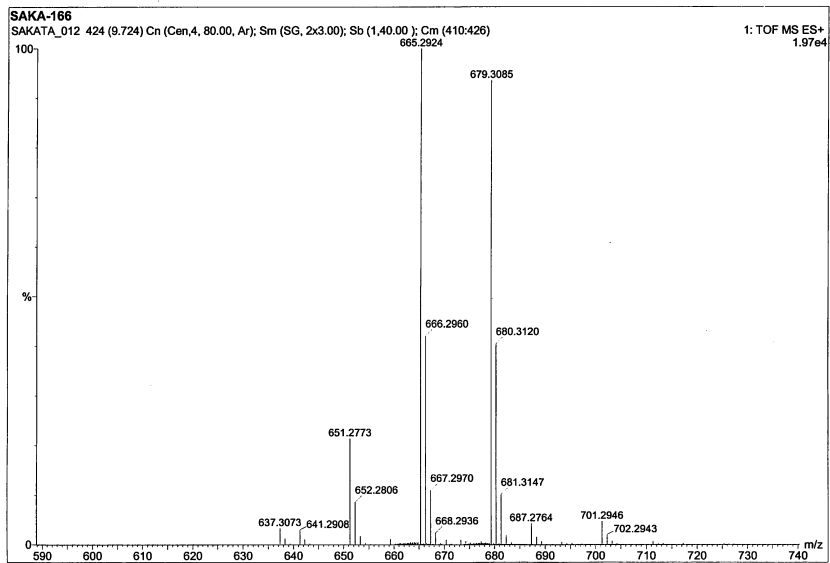

$\text{Im}_3\text{-NH}(\text{CH}_2)_5\text{NHFmoc}$  (**31**)  $^1\text{H-NMR}$  ( $\text{DMSO-d}_6$ )

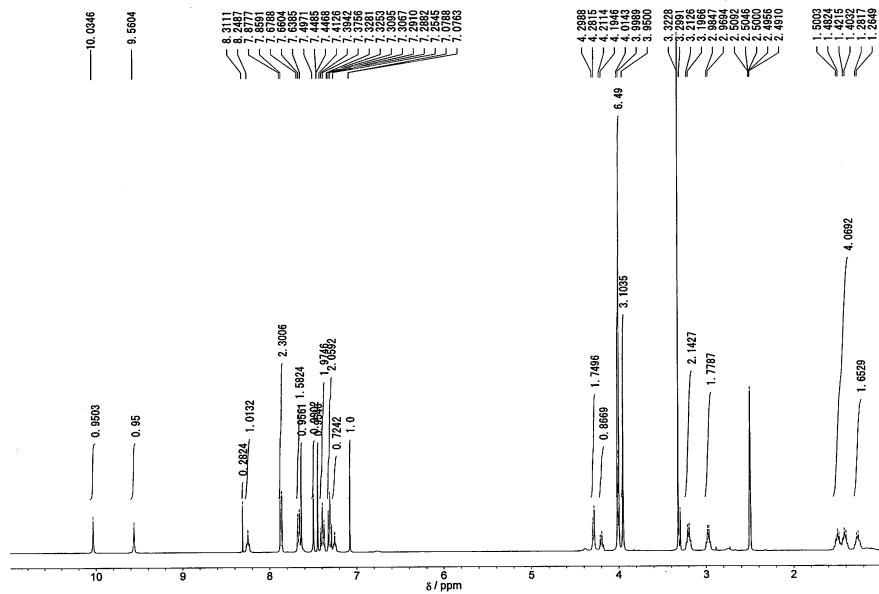

$\text{Im}_3\text{-NH}(\text{CH}_2)_5\text{NHFmoc}$  (**31**)  $^{13}\text{C-NMR}$  ( $\text{CDCl}_3$ )

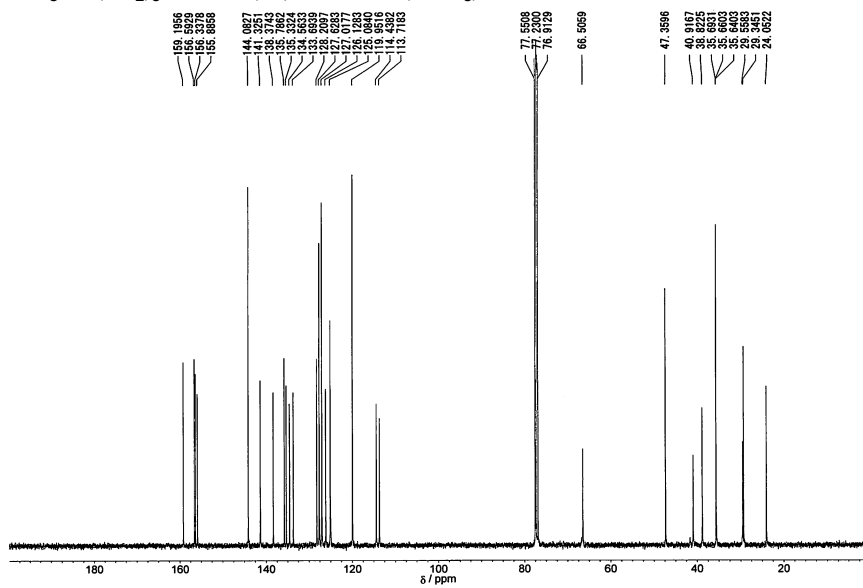

Py<sub>3</sub>-NH(CH<sub>2</sub>)<sub>3</sub>CO<sub>2</sub>Et (32)

Elemental Composition Report

Single Mass Analysis

Tolerance = 20.0 PPM / DBE: min = -1.5, max = 300.0

Element prediction: Off

Number of isotope peaks used for i-FIT = 3

Monoisotopic Mass, Even Electron Ions

5 formula(e) evaluated with 1 results within limits (up to 20 closest results for each mass)

Elements Used:

C: 1-300 H: 1-1000 N: 6-6 O: 5-5

yu-Py3GABA

M-8434 98 (1.167) AM (Cen,4, 80.00, Ar,8500.0,556.28,0.00,LS 10); Sm (SG, 2x3.00); Sb (1,40.00); Cm (95:129)

1: TOF MS ES+  
1.52e+04

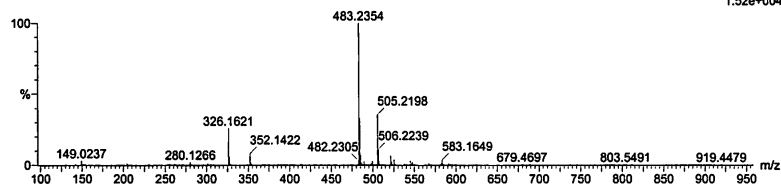

Minimum: 100.0 20.0 -1.5  
Maximum: 483.2354 300.0

| Mass     | Calc. Mass | mDa  | PPM  | DBE  | i-FIT | Formula       |
|----------|------------|------|------|------|-------|---------------|
| 483.2354 | 483.2356   | -0.2 | -0.4 | 12.5 | 62.6  | C24 H31 N6 O5 |

Py<sub>3</sub>-NH(CH<sub>2</sub>)<sub>3</sub>CO<sub>2</sub>Et (32)

yu-Py3GABA

M-8434 98 (1.167) AM (Cen,4, 80.00, Ar,8500.0,556.28,0.00,LS 10); Sm (SG, 2x3.00); Sb (1,40.00); Cm (95:129)

1: TOF MS ES+  
1.52e+04

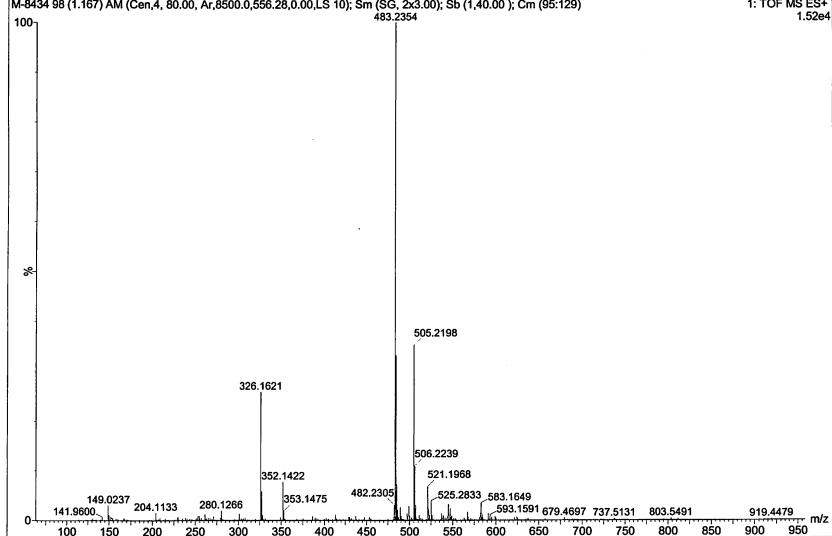

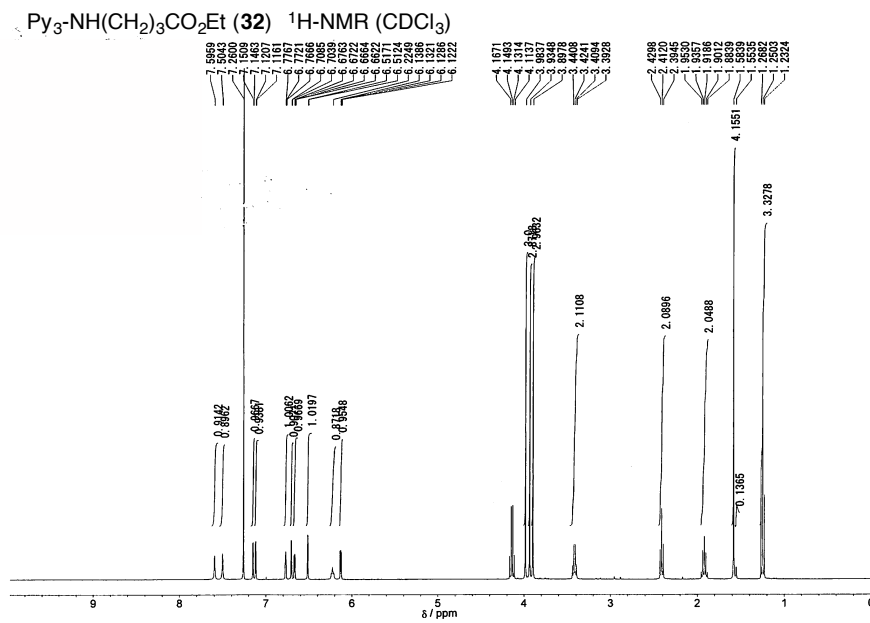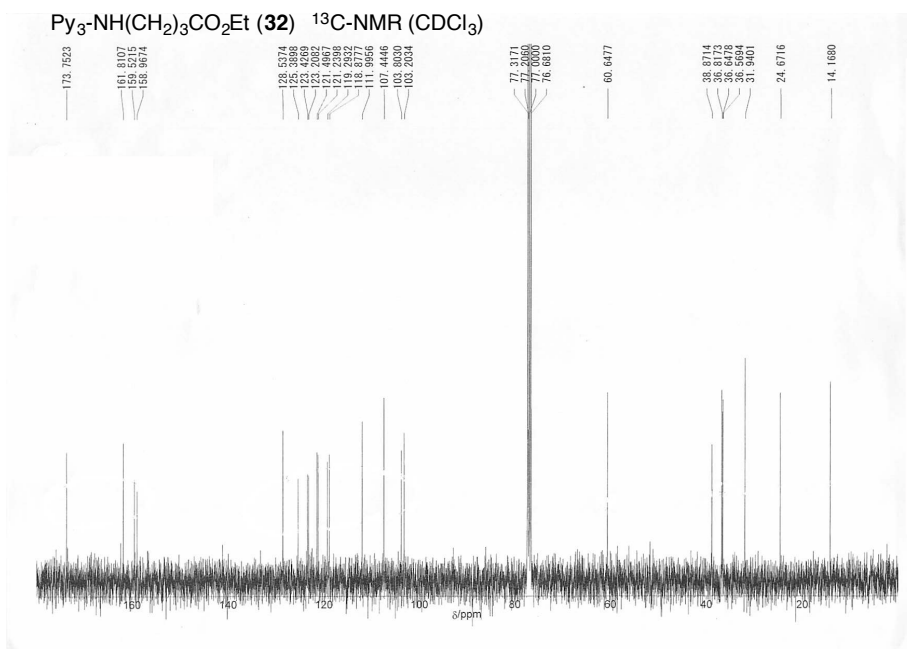

Py<sub>3</sub>-NH(CH<sub>2</sub>)<sub>3</sub>CO<sub>2</sub>H  
 Elemental Composition Report

**Single Mass Analysis**  
 Tolerance = 20.0 PPM / DBE: min = 0.5, max = 500.0  
 Element prediction: Off  
 Number of isotope peaks used for i-FIT = 4

Monoisotopic Mass, Even Electron Ions  
 5 formula(e) evaluated with 1 results within limits (all results (up to 1000) for each mass)

Elements Used:  
 C: 1-300 H: 1-1000 N: 6-6 O: 5-5

koga-156  
 KOGAWARA\_002 44 (0.537) Cn (Cen,4, 80.00, Ar); Sm (SG, 2x3.00); Cm (2:44)

1: TOF MS ES+  
 1.18e+005

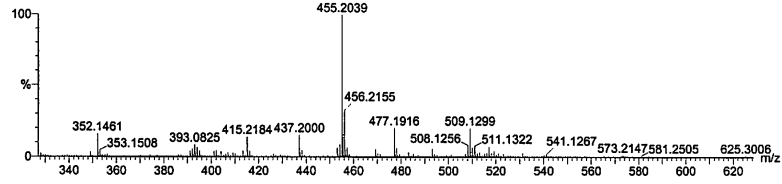

Minimum: 0.5  
 Maximum: 100.0 20.0 500.0

| Mass     | Calc. Mass | mDa  | PPM  | DBE  | i-FIT  | Formula       |
|----------|------------|------|------|------|--------|---------------|
| 455.2039 | 455.2043   | -0.4 | -0.9 | 12.5 | 1368.3 | C22 H27 N6 O5 |

Py<sub>3</sub>-NH(CH<sub>2</sub>)<sub>3</sub>CO<sub>2</sub>H

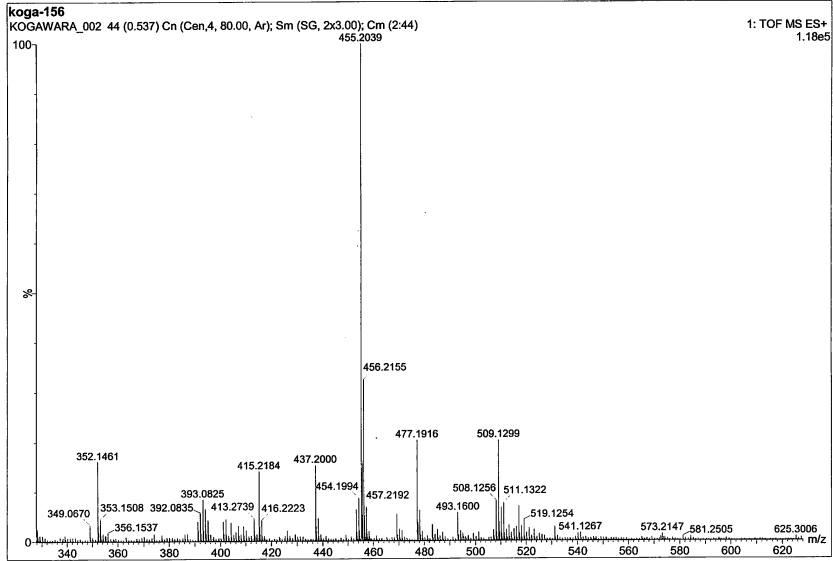

Py<sub>3</sub>-NH(CH<sub>2</sub>)<sub>3</sub>CO<sub>2</sub>H <sup>1</sup>H-NMR (DMSO-d<sub>6</sub>)

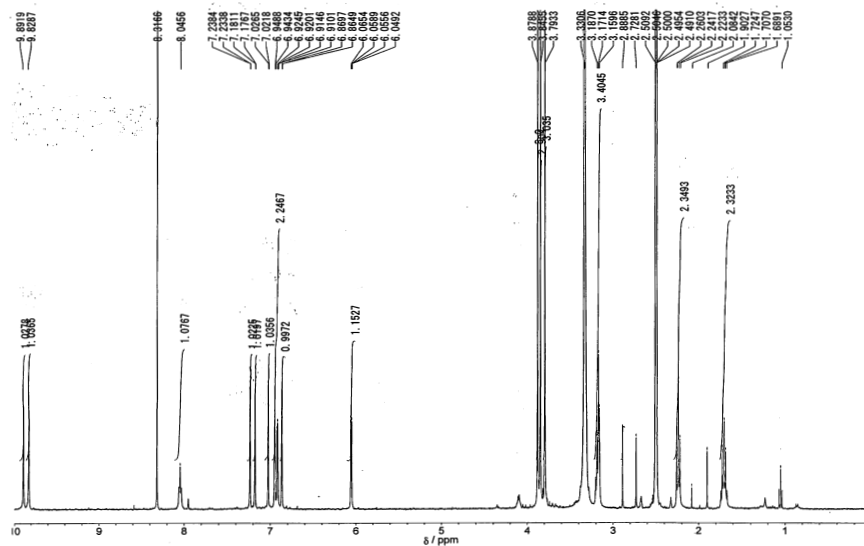

Py<sub>3</sub>-NH(CH<sub>2</sub>)<sub>3</sub>CO<sub>2</sub>H <sup>13</sup>C-NMR (DMSO-d<sub>6</sub>)

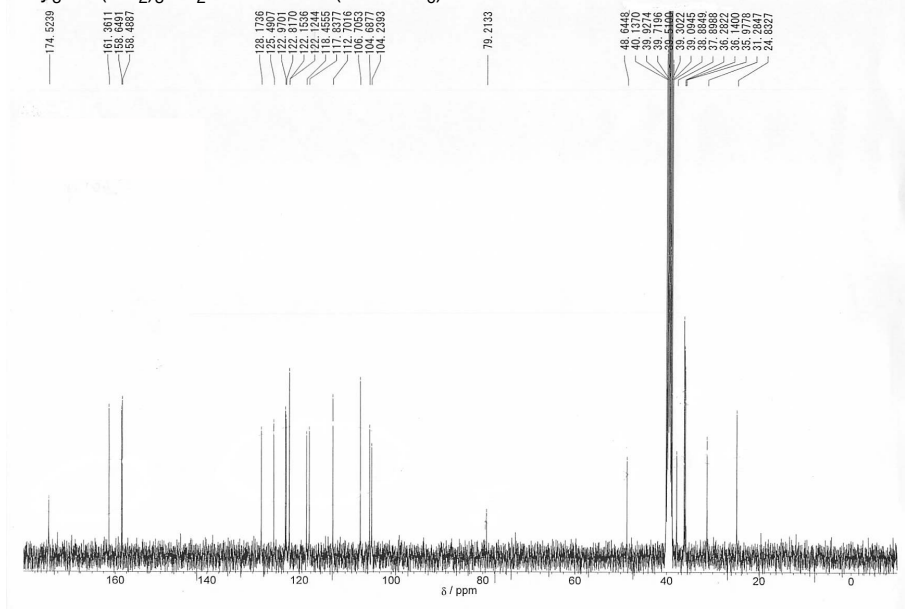

### BocHNIm<sub>3</sub>-OEt (33)

#### Elemental Composition Report

##### Single Mass Analysis

Tolerance = 20.0 PPM / DBE: min = 0.5, max = 500.0

Element prediction: Off

Number of isotope peaks used for i-FIT = 4

Monoisotopic Mass, Even Electron Ions

8 formula(e) evaluated with 1 results within limits (all results (up to 1000) for each mass)

Elements Used:

C: 1-300 H: 1-1000 N: 9-9 O: 6-6 1271: 0-1

koga-147

OGASAHARA\_023 82 (0.982) Cn (Cen,4, 80.00, Ar); Sm (SG, 2x3.00); Cm (71:112)

1: TOF MS ES+  
1.97e+004

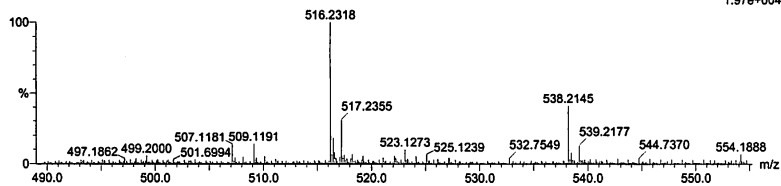

Minimum: 0.5  
Maximum: 100.0 20.0 500.0

| Mass     | Calc. Mass | mDa  | PPM  | DBE  | i-FIT | Formula       |
|----------|------------|------|------|------|-------|---------------|
| 516.2318 | 516.2319   | -0.1 | -0.2 | 12.5 | 523.7 | C22 H30 N9 O6 |

### BocHNIm<sub>3</sub>-OEt (33)

koga-147

OGASAHARA\_023 82 (0.982) Cn (Cen,4, 80.00, Ar); Sm (SG, 2x3.00); Cm (71:112)

1: TOF MS ES+  
1.97e4

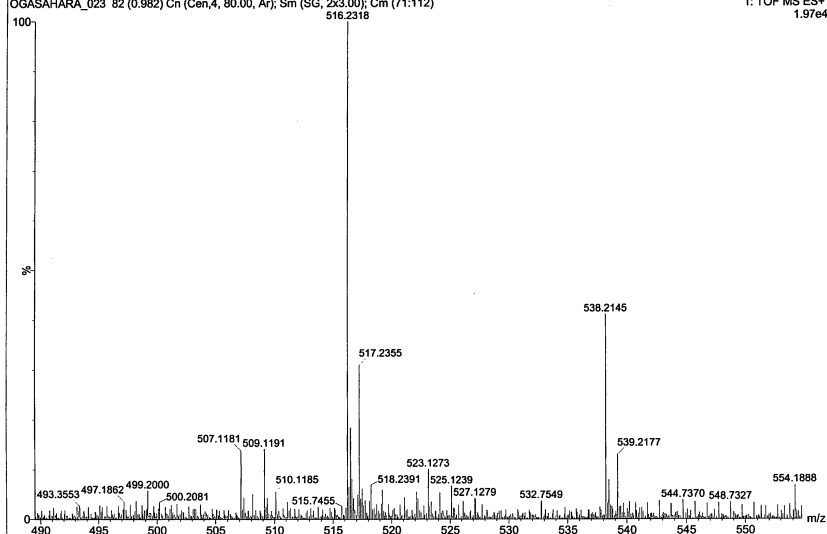



BocHNIm<sub>3</sub>-OEt (**33**) <sup>1</sup>H-NMR (CDCl<sub>3</sub>)

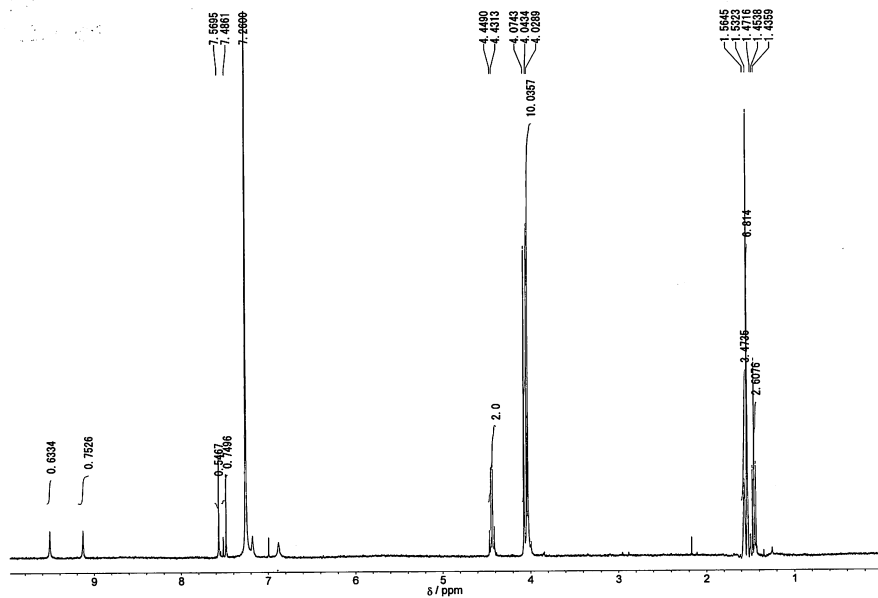

BocHNIm<sub>3</sub>-OEt (**33**) <sup>13</sup>C-NMR (CDCl<sub>3</sub>)

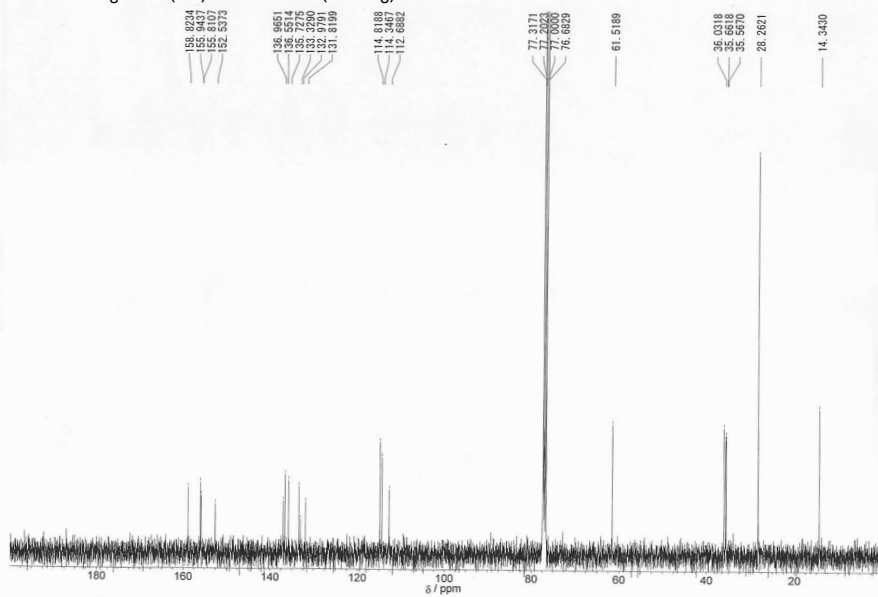

H<sub>2</sub>Nlm<sub>3</sub>-OEt  
**Elemental Composition Report**

**Single Mass Analysis**

Tolerance = 10.0 mDa / DBE: min = -1.5, max = 300.0  
 Element prediction: Off  
 Number of isotope peaks used for i-FIT = 3

Monoisotopic Mass, Even Electron Ions  
 4 formula(e) evaluated with 1 results within limits (up to 50 closest results for each mass)

Elements Used:

C: 0-300 H: 0-1000 N: 0-9 O: 4-4

NH<sub>2</sub>lm<sub>3</sub>OEt

M-12011 192 (1.549) AM2 (Ar,22000.0,0.00,0.00); ABS; Cm (192.213)

1: TOF MS ES+  
 8.81e+007

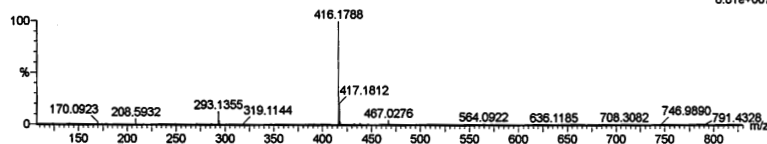

Minimum: -1.5  
 Maximum: 10.0 20.0 300.0

| Mass     | Calc. Mass | mDa  | PPM  | DBE  | i-FIT | Norm | Conf (%) | Formula       |
|----------|------------|------|------|------|-------|------|----------|---------------|
| 416.1788 | 416.1795   | -0.7 | -1.7 | 11.5 | 724.1 | n/a  | n/a      | C17 H22 N9 O4 |

H<sub>2</sub>Nlm<sub>3</sub>-OEt

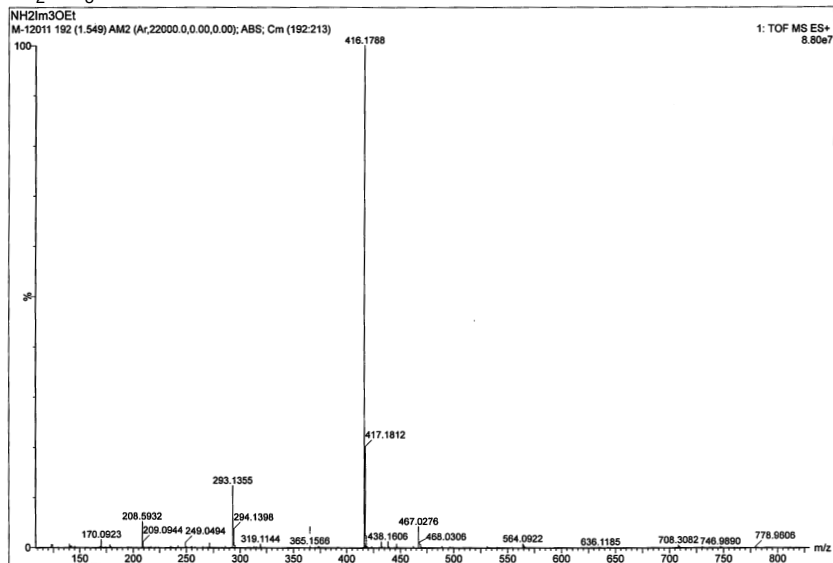

H<sub>2</sub>NIm<sub>3</sub>-OEt <sup>1</sup>H-NMR (CD<sub>3</sub>OD)

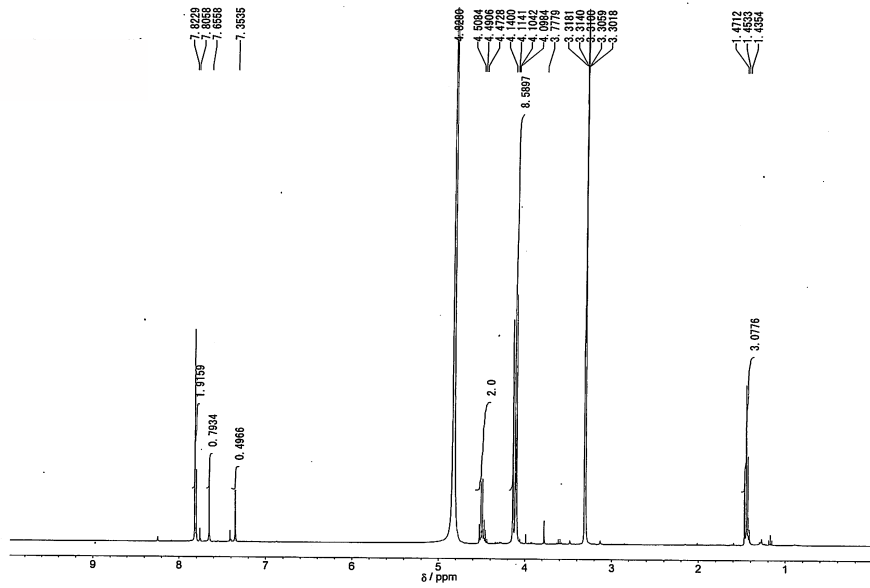

H<sub>2</sub>NIm<sub>3</sub>-OEt <sup>13</sup>C-NMR (DMSO-d<sub>6</sub>)

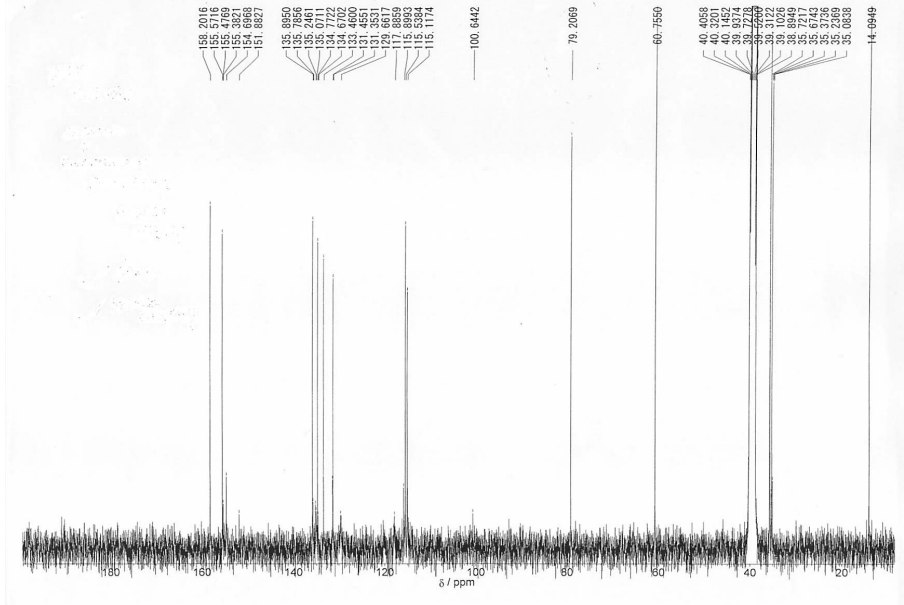

**Py<sub>3</sub>-γ-Im<sub>3</sub>-OEt (34)**  
**Elemental Composition Report**

**Single Mass Analysis**  
 Tolerance = 20.0 PPM / DBE: min = -1.5, max = 300.0  
 Element prediction: Off  
 Number of isotope peaks used for i-FIT = 3

Monoisotopic Mass, Even Electron Ions  
 8 formula(e) evaluated with 1 results within limits (up to 20 closest results for each mass)

Elements Used:

C: 1-300 H: 1-1000 N: 15-15 O: 8-8

yu-199cru

M-7935-1 79 (0.951) AM (Cen,4, 80.00, Ar,8500.0,556.28,0.00,LS 10); Sm (SG, 2x3.00); Sb (1,40.00); Cm (79:119)

1: TOF MS ES+  
 1.05e+005

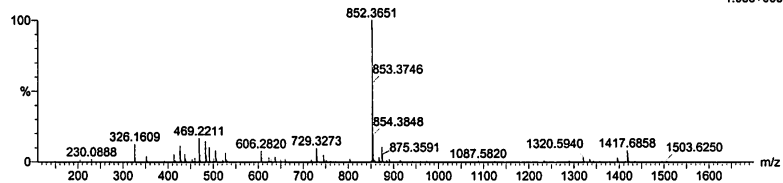

Minimum: -1.5  
 Maximum: 100.0 20.0 300.0

| Mass     | Calc. Mass | mDa  | PPM  | DBE  | i-FIT | Formula        |
|----------|------------|------|------|------|-------|----------------|
| 852.3651 | 852.3654   | -0.3 | -0.4 | 24.5 | 758.9 | C39 H46 N15 O8 |

**Py<sub>3</sub>-γ-Im<sub>3</sub>-OEt (34)**

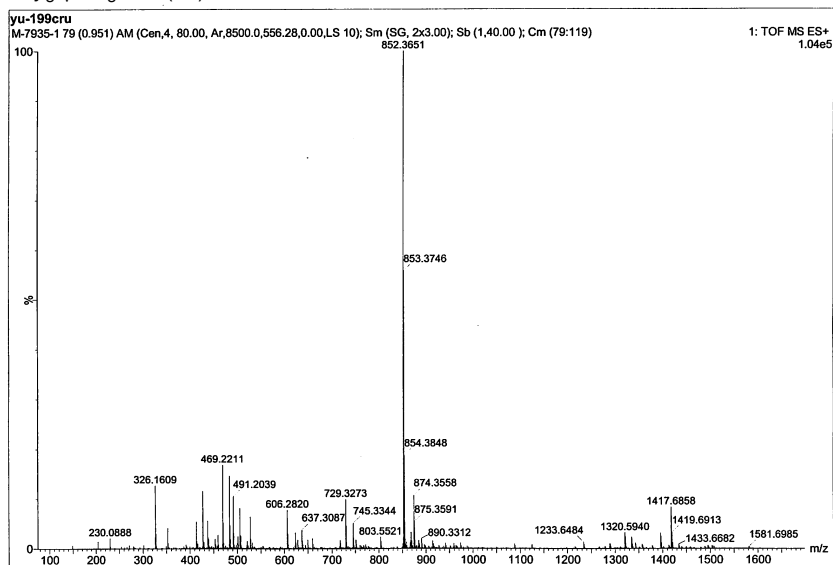

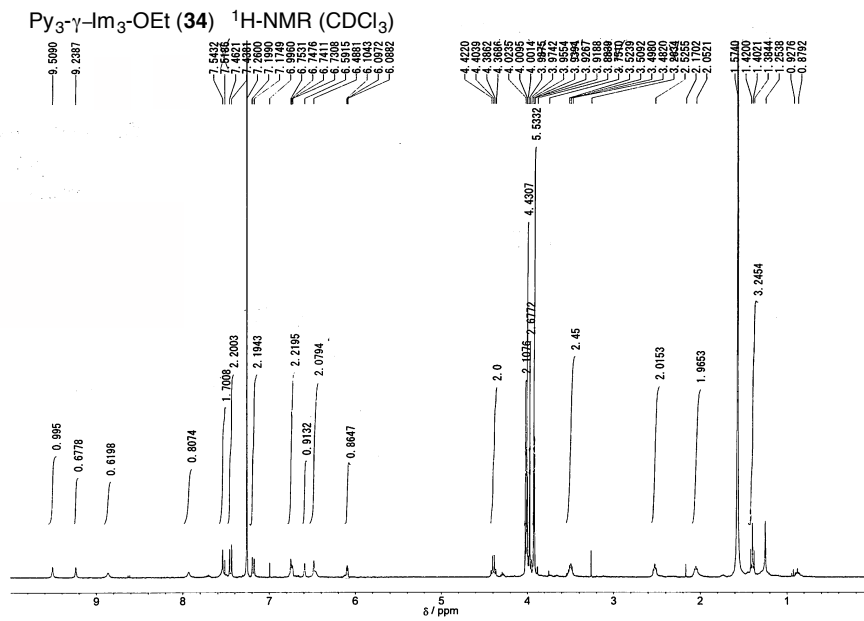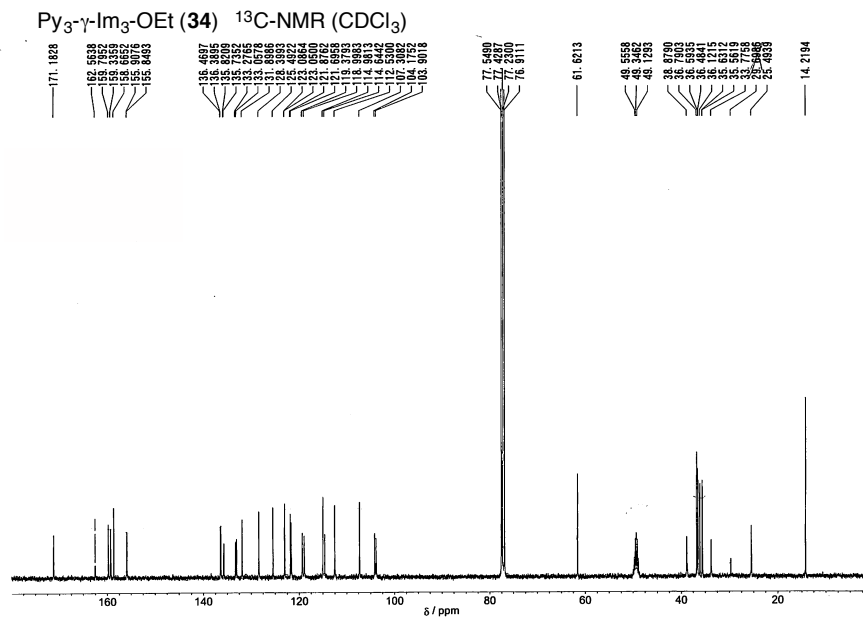

Py<sub>3</sub>-γ-Im<sub>3</sub>-OH (carboxylic acid)

Single Mass Analysis

Tolerance = 10.0 mDa / DBE: min = -1.5, max = 300.0  
 Element prediction: Cff  
 Number of isotope peaks used for I-FIT = 3

Monoisotopic Mass, Even Electron Ions  
 8 formula(e) evaluated with 1 results within limits (up to 50 closest results for each mass)  
 Elements Used:

C: 0-300 H: 0-3000 N: 15-15 O: 8-8

m1-p132  
 M-19808 162 (1.647) AM2 (Ar,22000.0,0.00,0.00); ABS; Cm (153:183)

1: TOF MS ES+  
 4.62e+007

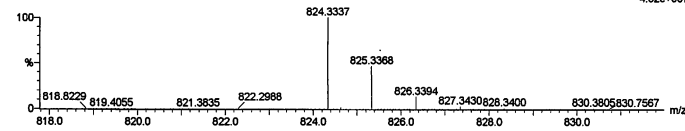

Minimum: 10.0 5.0 -1.5  
 Maximum: 300.0

| Mass     | Calc. Mass | mDa  | PPM  | DBE  | I-FIT | Norm | Conf (%) | Formula        |
|----------|------------|------|------|------|-------|------|----------|----------------|
| 824.3337 | 824.3341   | -0.4 | -0.5 | 24.5 | 502.7 | n/a  | n/a      | C37 H42 N15 O8 |

Py<sub>3</sub>-γ-Im<sub>3</sub>-OH (carboxylic acid)

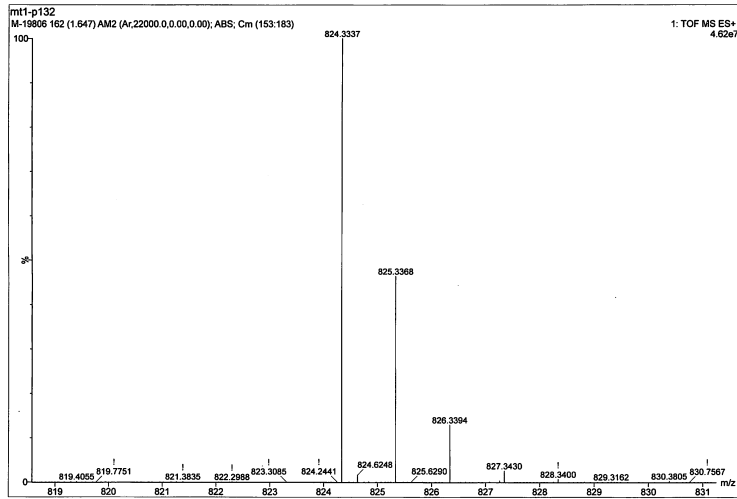

Py<sub>3</sub>-γ-Im<sub>3</sub>-OH (carboxylic acid) <sup>1</sup>H-NMR (DMSO-d<sub>6</sub>)

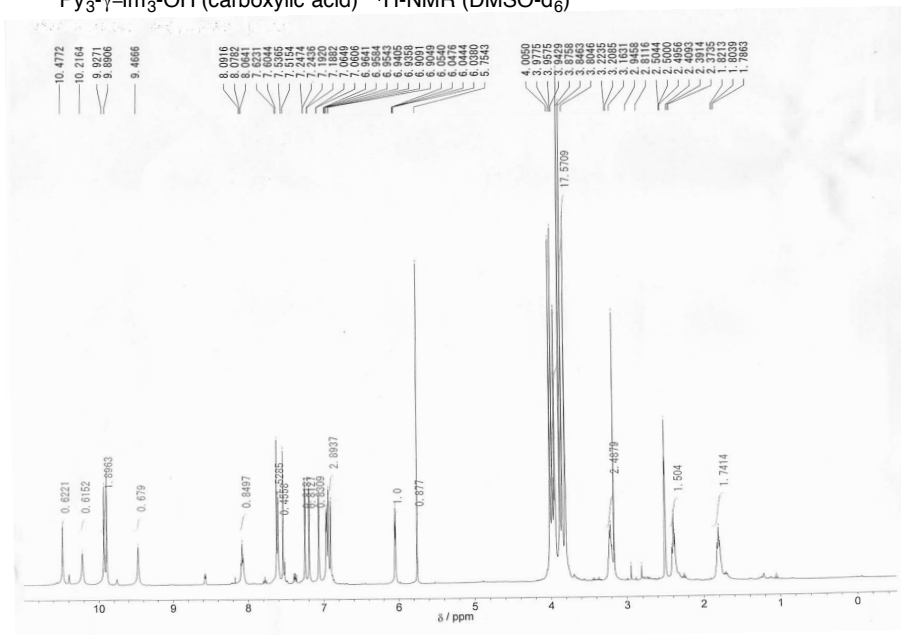

Py<sub>3</sub>-γ-Im<sub>3</sub>-OH (carboxylic acid) <sup>13</sup>C-NMR (DMSO-d<sub>6</sub>)

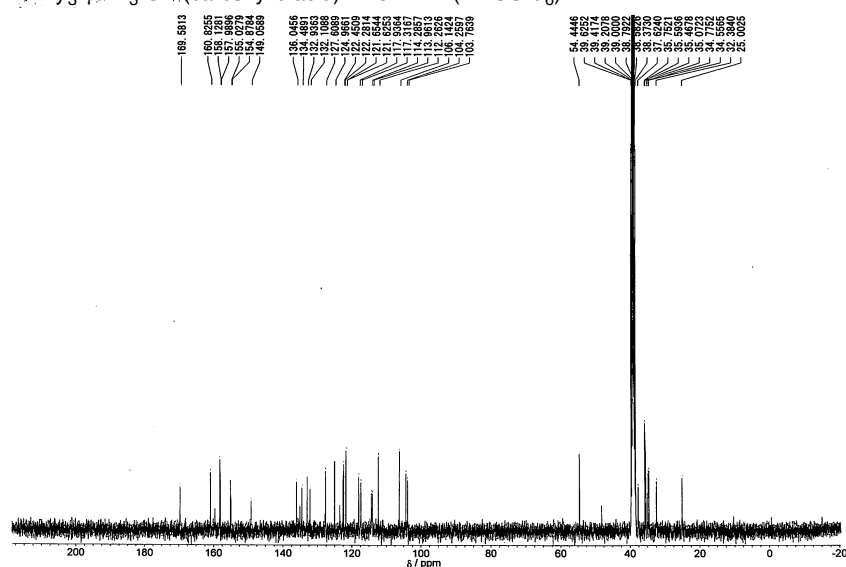

Py<sub>3</sub>-γ-Im<sub>3</sub>-NH(CH<sub>2</sub>)<sub>2</sub>NHFmoc (35)

Elemental Composition Report

Single Mass Analysis

Tolerance = 20.0 PPM / DBE: min = -1.5, max = 300.0

Element prediction: Off

Number of isotope peaks used for i-FIT = 3

Monoisotopic Mass, Even Electron Ions

10 formula(s) evaluated with 1 results within limits (up to 20 closest results for each mass)

Elements Used:

C: 1-300 H: 1-1000 N: 17-17 O: 9-9

P160C2

M-9249 187 (2.223) AM (Cen,4, 80.00, Ar,8500.0,556.28,0.00,LS 10); Sm (SG, 2x3.00); Sb (1,40.00); Cm (183:216)

1: TOF MS ES+  
1.20e+004

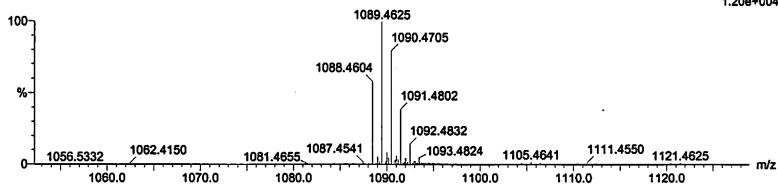

Minimum: 100.0 20.0 -1.5  
Maximum: 300.0

| Mass      | Calc. Mass | mDa | PPM | DBE  | i-FIT  | Formula        |
|-----------|------------|-----|-----|------|--------|----------------|
| 1088.4604 | 1088.4603  | 0.1 | 0.1 | 34.5 | 4443.2 | C54 H58 N17 O9 |

Py<sub>3</sub>-γ-Im<sub>3</sub>-NH(CH<sub>2</sub>)<sub>2</sub>NHFmoc (35)

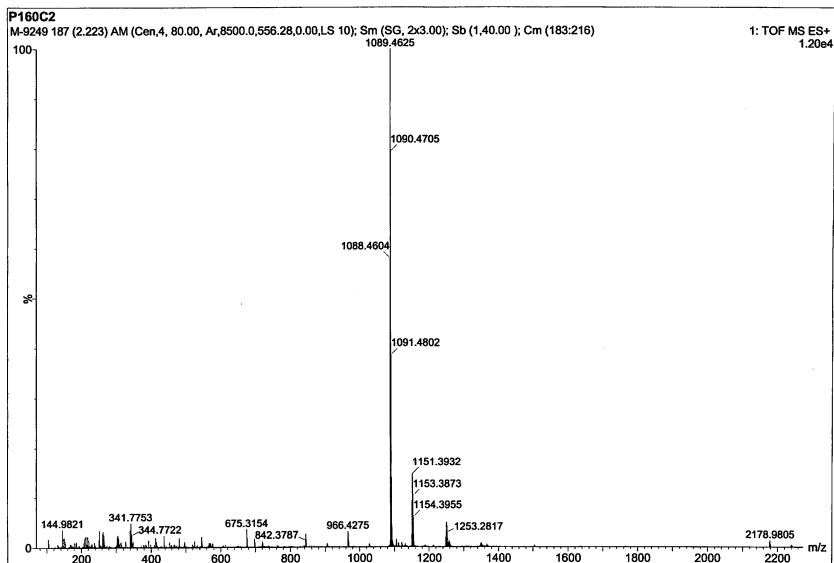





Py<sub>3</sub>-γ-Im<sub>3</sub>-NH(CH<sub>2</sub>)<sub>3</sub>NHFmoc (36)

Elemental Composition Report

Single Mass Analysis

Tolerance = 20.0 PPM / DBE: min = -1.5, max = 300.0  
 Element prediction: Off  
 Number of isotope peaks used for i-FIT = 3

Monoisotopic Mass, Even Electron Ions  
 10 formula(e) evaluated with 1 results within limits (up to 20 closest results for each mass)

Elements Used:

C: 1-300 H: 1-1000 N: 17-17 O: 9-9

yu2-11-3

M-8017 616 (7.298) AM (Cen,4, 80.00, Ar,8500.0,556.28,0.00,LS 10); Sm (SG, 2x3.00); Sb (1,40.00); Cm (596:630)

1: TOF MS ES+  
 3.22e+004

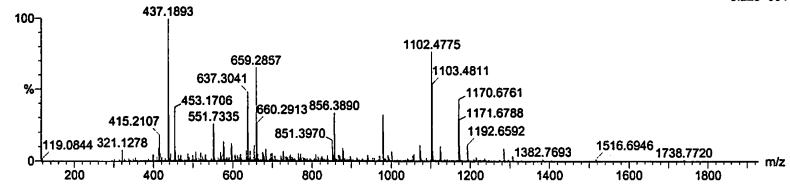

Minimum: 100.0 20.0 -1.5  
 Maximum: 100.0 20.0 300.0

| Mass      | Calc. Mass | mDa | PPM | DBE  | i-FIT | Formula        |
|-----------|------------|-----|-----|------|-------|----------------|
| 1102.4775 | 1102.4760  | 1.5 | 1.4 | 34.5 | 31.9  | C55 H60 N17 O9 |

Py<sub>3</sub>-γ-Im<sub>3</sub>-NH(CH<sub>2</sub>)<sub>3</sub>NHFmoc (36)

yu2-11-3

M-8017 616 (7.298) AM (Cen,4, 80.00, Ar,8500.0,556.28,0.00,LS 10); Sm (SG, 2x3.00); Sb (1,40.00); Cm (596:630)

1: TOF MS ES+  
 2.47e4

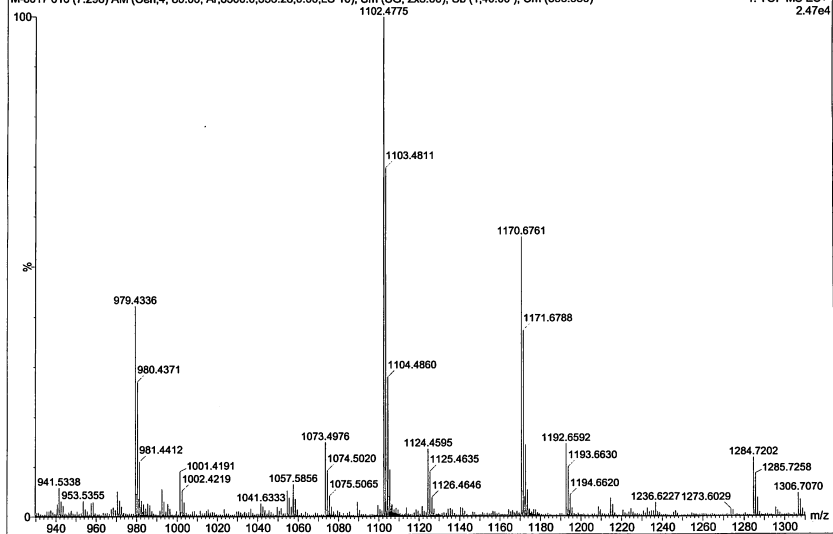

Py<sub>3</sub>-γ-I<sub>m</sub><sub>3</sub>-NH(CH<sub>2</sub>)<sub>3</sub>NHFmoc (36) <sup>1</sup>H-NMR (DMSO-d<sub>6</sub>)

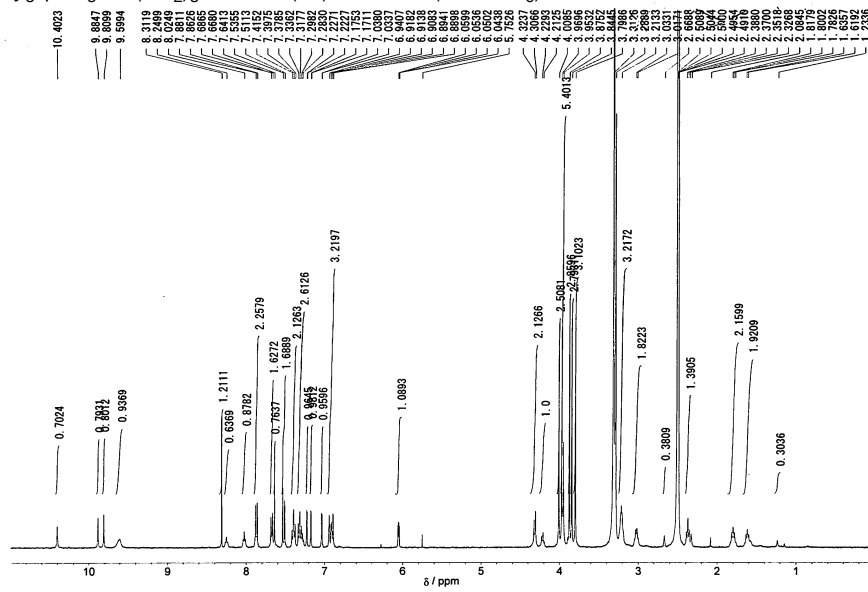

Py<sub>3</sub>-γ-I<sub>m</sub><sub>3</sub>-NH(CH<sub>2</sub>)<sub>3</sub>NHFmoc (36) <sup>13</sup>C-NMR (DMSO-d<sub>6</sub>)

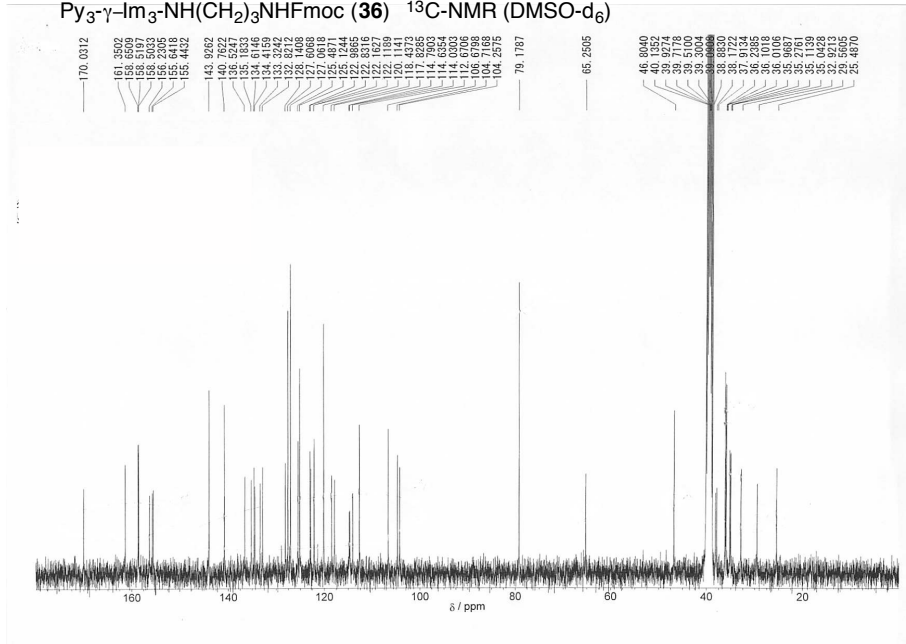

Py<sub>3</sub>-γ-Im<sub>3</sub>-NH(CH<sub>2</sub>)<sub>4</sub>NHFmoc (37)

Elemental Composition Report

Single Mass Analysis

Tolerance = 20.0 PPM / DBE: min = -1.5, max = 300.0

Element prediction: Off

Number of isotope peaks used for i-FIT = 3

Monoisotopic Mass, Even Electron Ions

11 formula(e) evaluated with 1 results within limits (up to 20 closest results for each mass)

Elements Used:

C: 1-300 H: 1-1000 N: 17-17 O: 9-9

yu-181

M-8004 145 (1.727) AM (Cen,4, 80.00, Ar,8500.0,556.28,0.00,LS 10); Sm (SG, 2x3.00); Sb (1,40.00); Cm (144:175)

1: TOF MS ES+  
7.42e+004

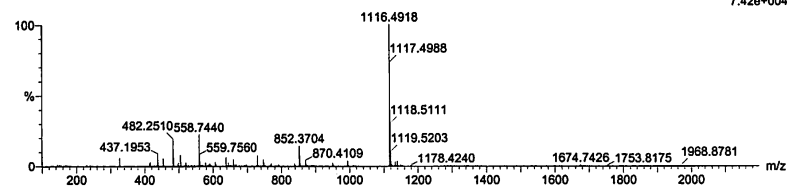

Minimum: 100.0 20.0 -1.5  
Maximum: 300.0

| Mass      | Calc. Mass | mDa | PPM | DBE  | i-FIT | Formula        |
|-----------|------------|-----|-----|------|-------|----------------|
| 1116.4918 | 1116.4916  | 0.2 | 0.2 | 34.5 | 207.8 | C56 H62 N17 O9 |

Py<sub>3</sub>-γ-Im<sub>3</sub>-NH(CH<sub>2</sub>)<sub>4</sub>NHFmoc (37)

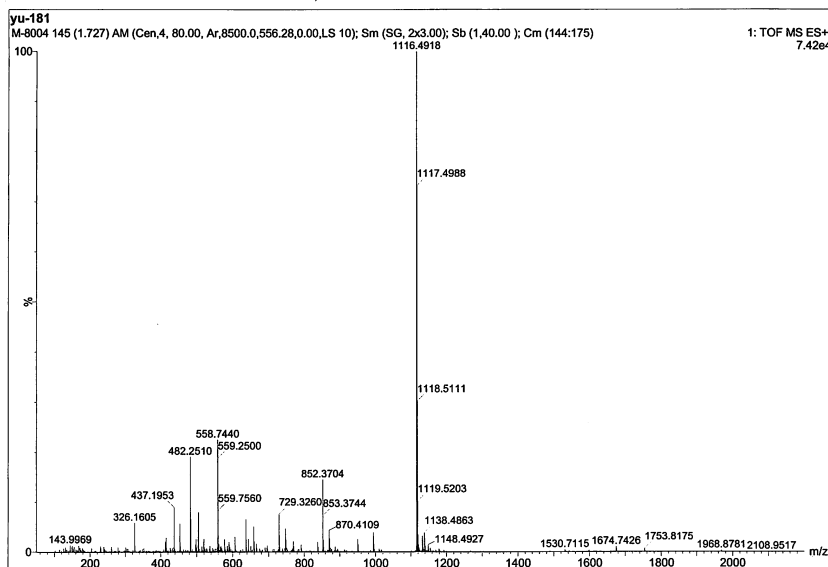

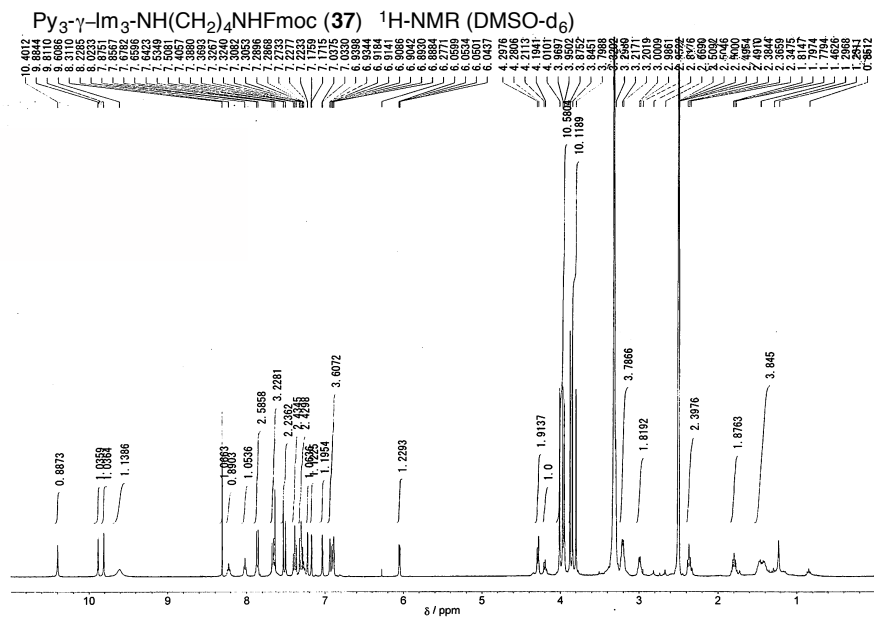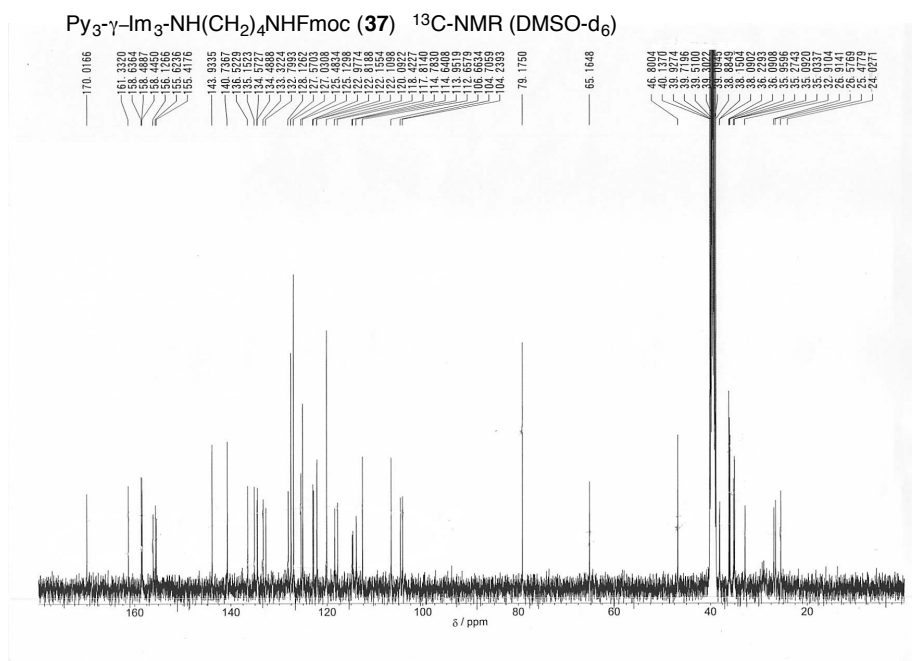

**Figure S2:** UV spectra of MGB amide compounds **4**, **6**, **28** and **34**.

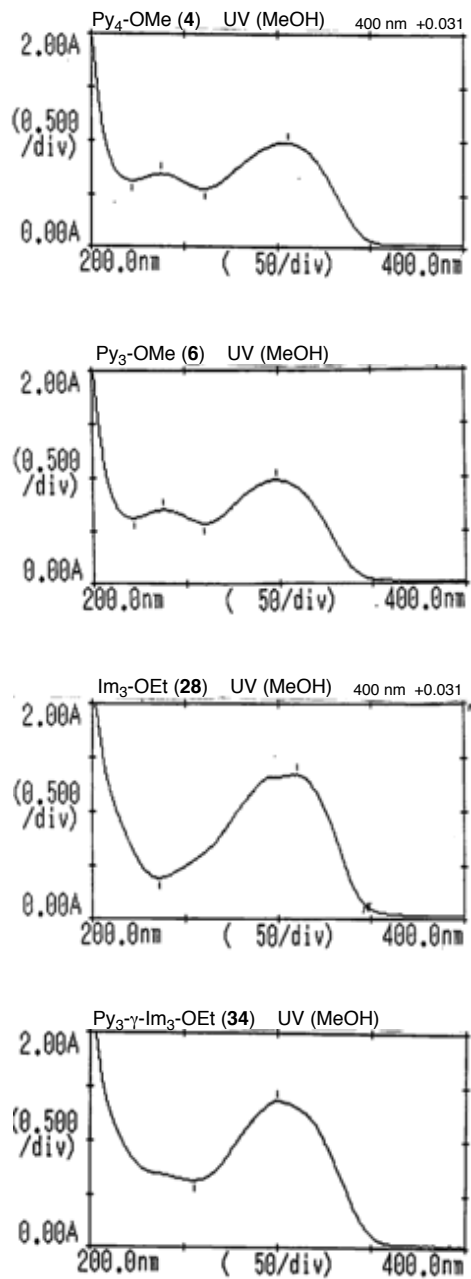

**Figure S3:** HPLC charts of MGB polyamide-oligonucleotide conjugates.

(A) HPLC chart of crude products of the preparation of modified DNA.

(B) HPLC chart of the modified DNA isolated from crude products (A).

HPLC conditions: Detection: UV 260 nm, flow rate: 1.0 mL/min, mobile phase: 5-50% CH<sub>3</sub>CN in water (0.01 M TEAA, pH 7), column:  $\mu$ BONDASPHARE C18 5  $\mu$ m 100A (3.9 mm ID x 150 mm L)

5'-d(CGG AATTTGGC)-3'

**G** = Py<sub>4</sub>-NH-(CH<sub>2</sub>)<sub>n</sub>-G, ON 1 (n = 3, 4, 5), **G** = Py<sub>3</sub>-NH-(CH<sub>2</sub>)<sub>n</sub>-G, ON 2 (n = 4)

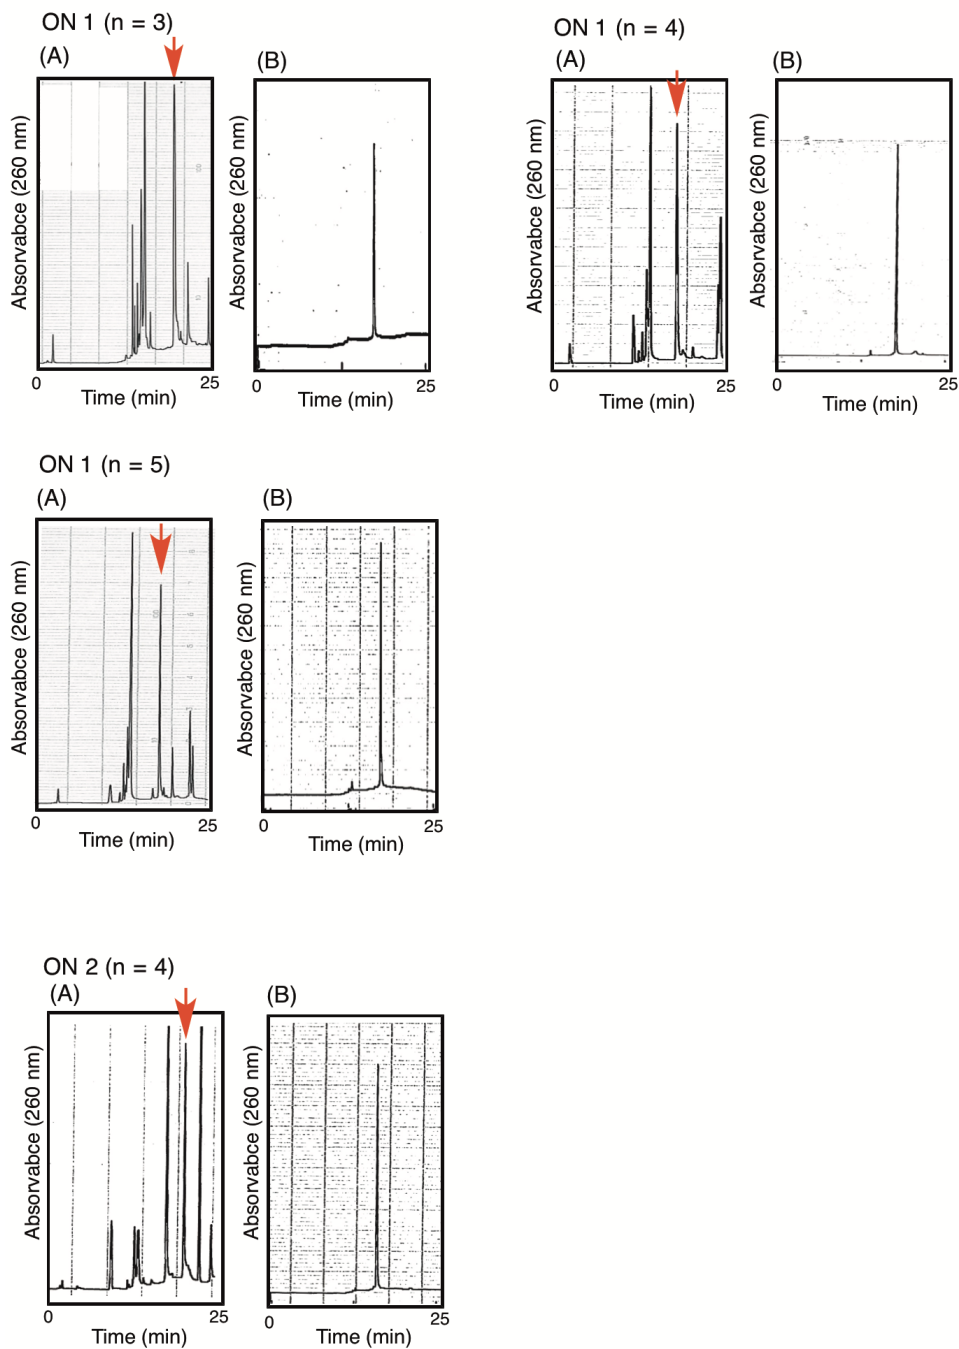

5'-d(CGGACCCTGGC)-3'

G = Im<sub>3</sub>NH-(CH<sub>2</sub>)<sub>n</sub>-G, ON 3 (n = 3, 4, 5), G = Py<sub>3</sub>γ.Im<sub>3</sub>NH-(CH<sub>2</sub>)<sub>n</sub>-G, ON 4 (n = 2, 3, 4)

ON 3 (n = 3)

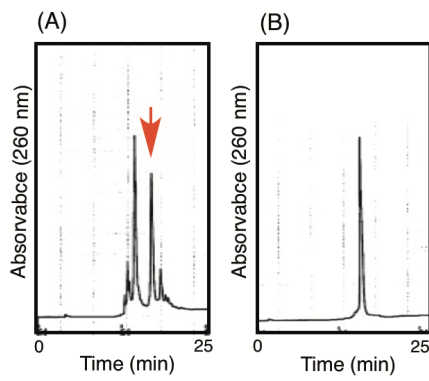

ON 3 (n = 4)

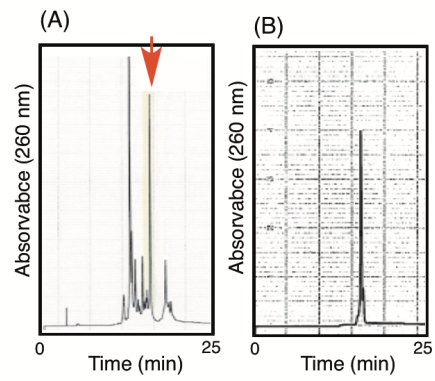

ON 3 (n = 5)

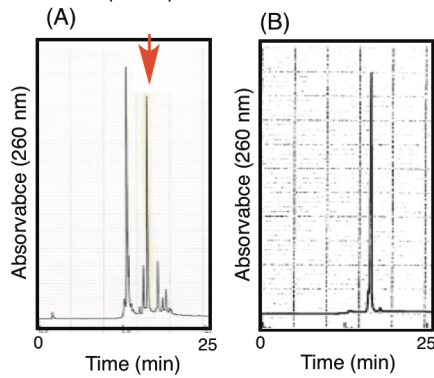

ON 4 (n = 2)

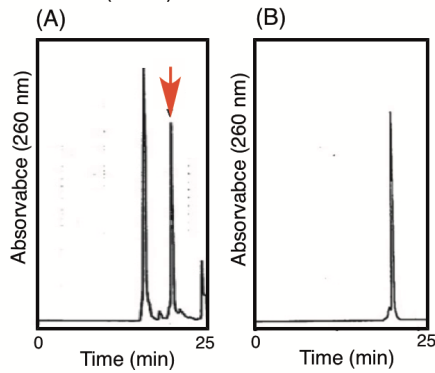

ON 4 (n = 3)

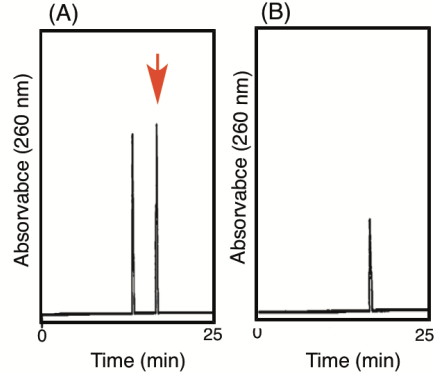

ON 5 (n = 4)

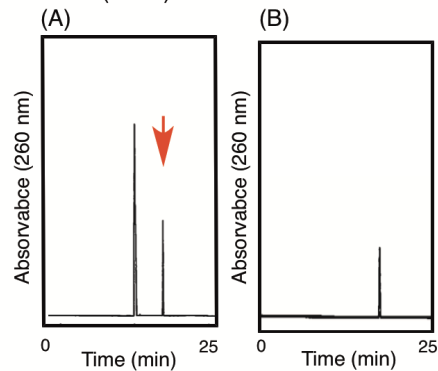



**Figure S4:** Mass spectra of MGB polyamide-oligonucleotide conjugates.

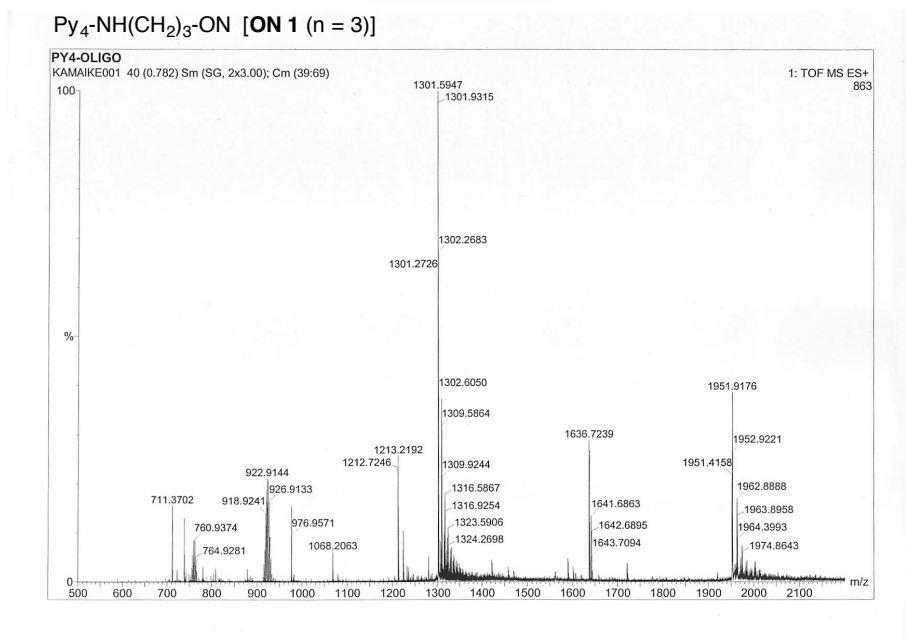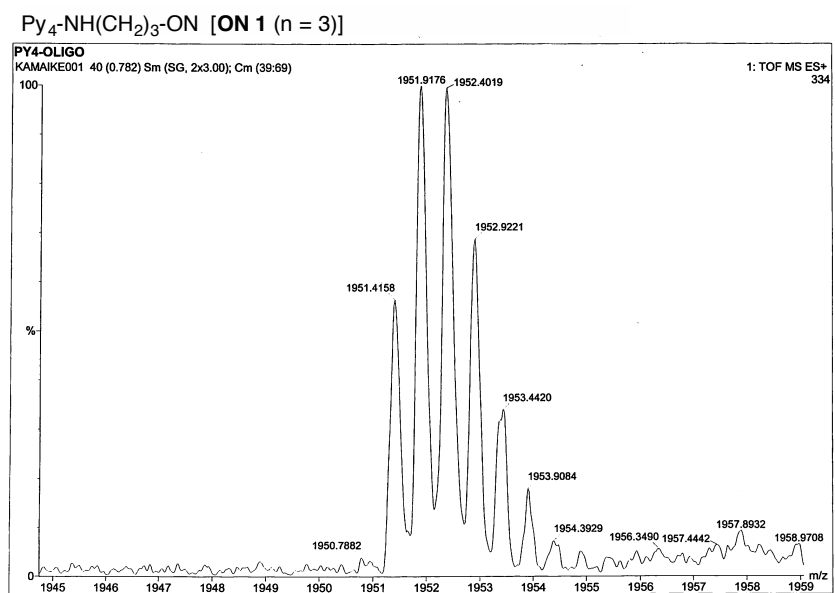

Py<sub>4</sub>-NH(CH<sub>2</sub>)<sub>4</sub>-ON [ON 1 (n = 4)]

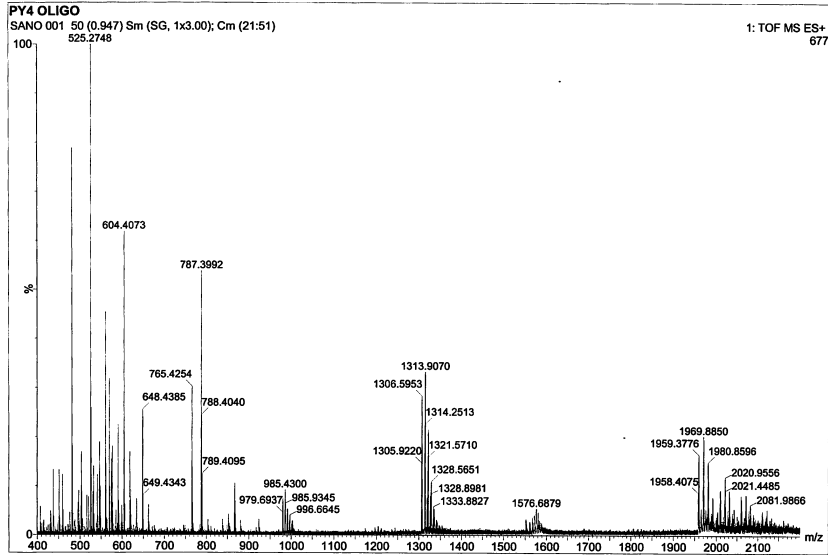

Py<sub>4</sub>-NH(CH<sub>2</sub>)<sub>4</sub>-ON [ON 1 (n = 4)]

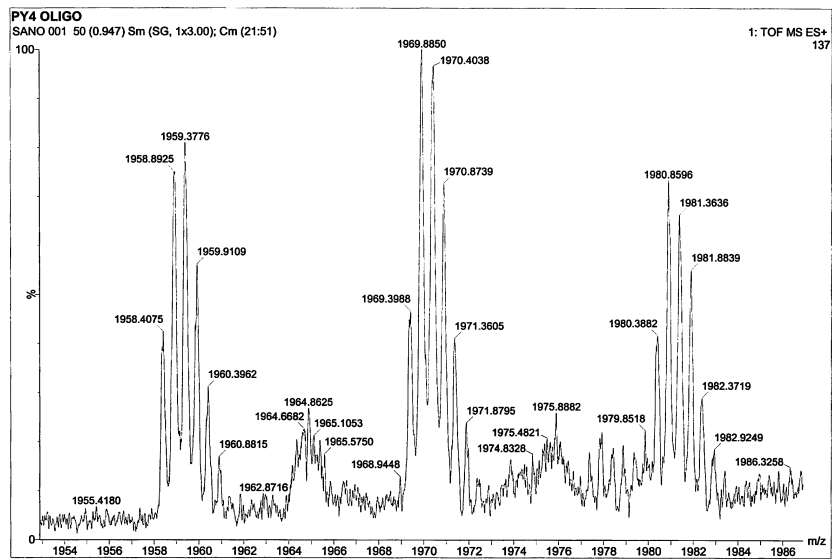

Py<sub>4</sub>-NH(CH<sub>2</sub>)<sub>5</sub>-ON [ON 1 (n = 5)]

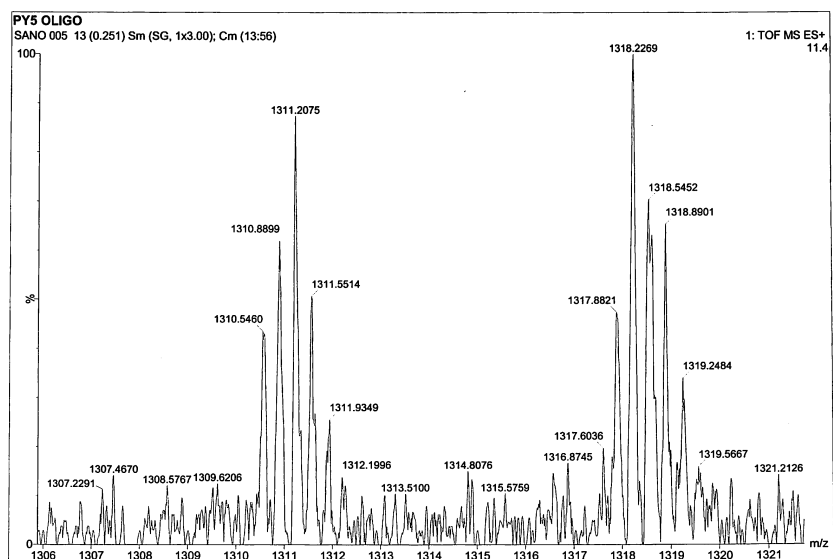

**Py<sub>3</sub>-NH(CH<sub>2</sub>)<sub>4</sub>-ON [ON 2 (n = 4)]**

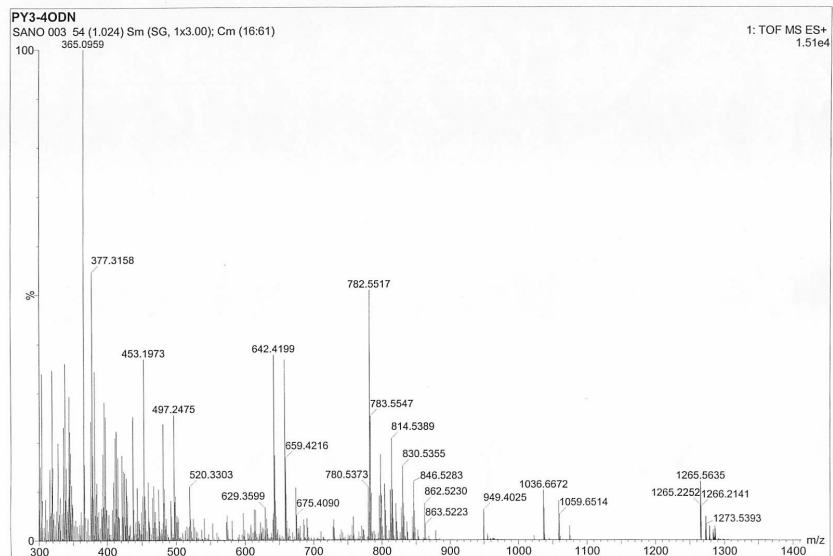

**Py<sub>3</sub>-NH(CH<sub>2</sub>)<sub>4</sub>-ON [ON 2 (n = 4)]**

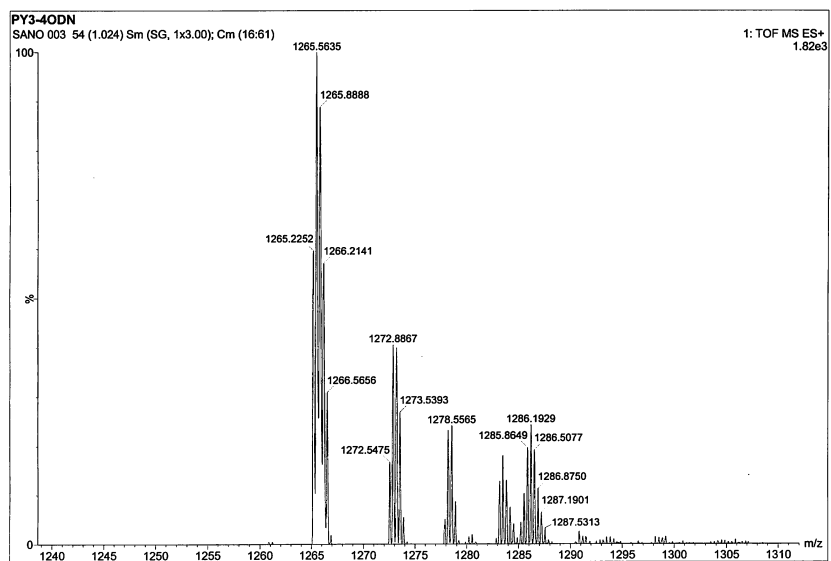

$\text{Im}_3\text{-NH}(\text{CH}_2)_3\text{-ON}$  [ON 3 (n = 3)]

**Elemental Composition Report**

**Single Mass Analysis**

Tolerance = 100.0 mDa / DBE: min = -1.5, max = 300.0

Element prediction: Off

Number of isotope peaks used for i-FIT = 3

Monoisotopic Mass, Even Electron Ions

1 formula(e) evaluated with 1 results within limits (up to 50 closest results for each mass)

Elements Used:

C: 123-123 H: 1-3000 N: 51-51 O: 67-67 P: 10-10

saka-146A

SAKATA 001 807 (9.566) M3 [Ev-75272,I150,En1] (25000.0,4,Pep,Cmp); Mk [Ev-2296,I150,En1] (25000.0,4,Pep,Cmp); Sm (SG, 3x3.00); Sb (10,10.00)

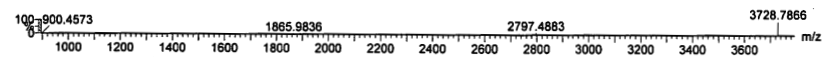

Minimum: -1.5  
Maximum: 100.0 10.0 300.0

| Mass      | Calc. Mass | mDa  | PPM | DBE  | i-FIT | Norm | Conf(%) | Formula               |
|-----------|------------|------|-----|------|-------|------|---------|-----------------------|
| 3728.7866 | 3728.7744  | 12.2 | 3.3 | 76.5 | 28.6  | n/a  | n/a     | C123 H156 N51 O67 P10 |

$\text{Im}_3\text{-NH}(\text{CH}_2)_3\text{-ON}$  [ON 3 (n = 3)]

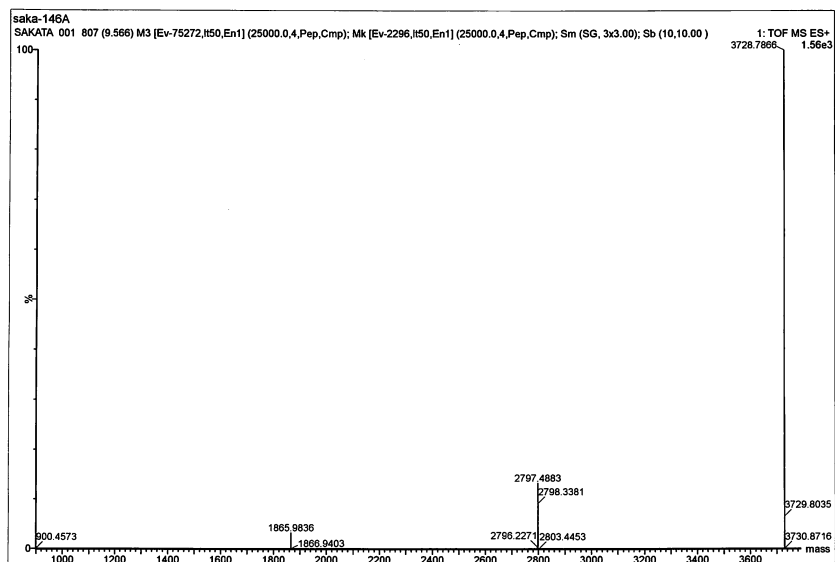

Im<sub>3</sub>-NH(CH<sub>2</sub>)<sub>4</sub>-ON [ON 3 (n = 4)]

**Elemental Composition Report**

**Single Mass Analysis**

Tolerance = 100.0 mDa / DBE: min = -1.5, max = 300.0

Element prediction: Off

Number of isotope peaks used for i-FIT = 3

Monoisotopic Mass, Even Electron Ions

1 formula(e) evaluated with 1 results within limits (up to 50 closest results for each mass)

Elements Used:

C: 124-124 H: 1-3000 N: 51-51 O: 67-67 P: 10-10

saka-167

SAKATA 003 403 (4.782) M3 [Ev-246599,I50,En1] (25000.0,4,Pep,Comp); Sm (SG, 3x3.00); Sb (10,10.00); Cm (365:412)

1: TOF MS ES+

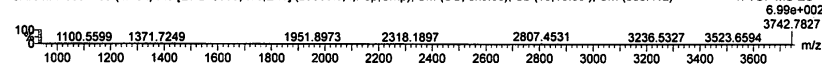

Minimum: -1.5  
Maximum: 300.0

| Mass      | Calc. Mass | mDa  | PPM  | DBE  | i-FIT | Norm | Conf(%) | Formula               |
|-----------|------------|------|------|------|-------|------|---------|-----------------------|
| 3742.7827 | 3742.7900  | -7.3 | -2.0 | 76.5 | 26.4  | n/a  | n/a     | C124 H158 N51 O67 P10 |

Im<sub>3</sub>-NH(CH<sub>2</sub>)<sub>4</sub>-ON [ON 3 (n = 4)]

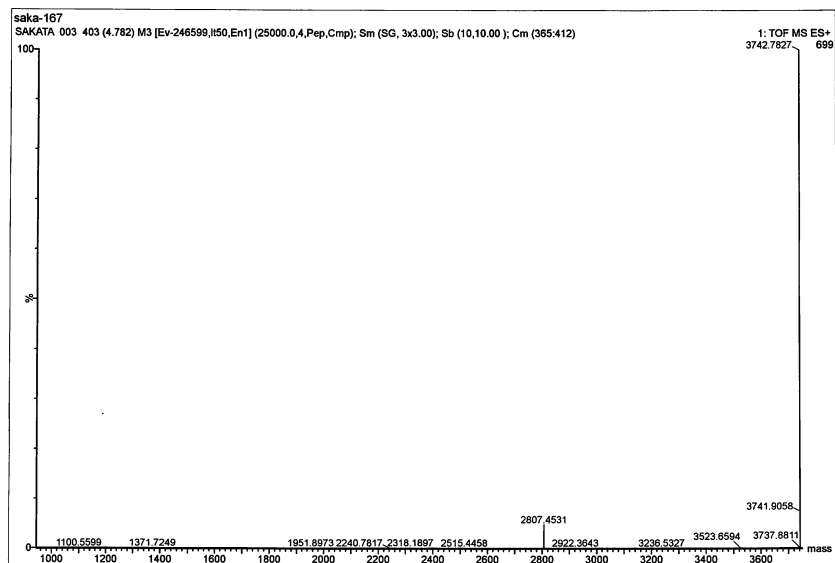

$\text{Im}_3\text{-NH}(\text{CH}_2)_5\text{-ON}$  [ON 3 (n = 5)]

Elemental Composition Report

Single Mass Analysis

Tolerance = 100.0 mDa / DBE: min = -1.5, max = 300.0

Element prediction: Off

Number of isotope peaks used for i-FIT = 3

Monoisotopic Mass, Even Electron Ions

1 formula(e) evaluated with 1 results within limits (up to 50 closest results for each mass)

Elements Used:

C: 125-125 H: 1-3000 N: 51-51 O: 67-67 P: 10-10

saka-169

SAKATA 006 81 (0.972) M3 [Ev125406,I150,En1] (25000.0,4,Pep,Cmp); Sm (SG, 3x3.00); Sb (10,10.00); Cm (57.90)

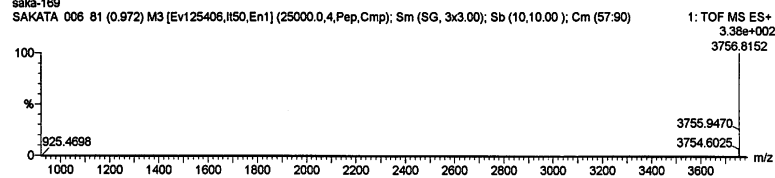

Minimum: -1.5  
Maximum: 100.0 10.0 300.0

| Mass      | Calc. Mass | mDa | PPM | DBE  | i-FIT | Norm | Conf (%) | Formula               |
|-----------|------------|-----|-----|------|-------|------|----------|-----------------------|
| 3756.8152 | 3756.8057  | 9.5 | 2.5 | 76.5 | 29.1  | n/a  | n/a      | C125 H160 N51 O67 P10 |

$\text{Im}_3\text{-NH}(\text{CH}_2)_5\text{-ON}$  [ON 3 (n = 5)]

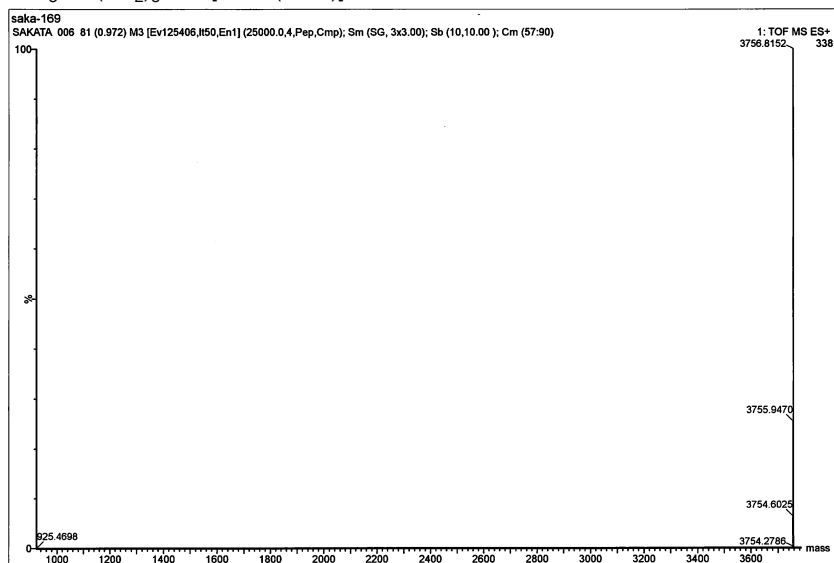

Py<sub>3</sub>-γ-I<sub>m</sub><sub>3</sub>-NH(CH<sub>2</sub>)<sub>2</sub>-ON [ON 4 (n = 2)]

Elemental Composition Report

Single Mass Analysis

Tolerance = 20.0 PPM / DBE: min = -1.5, max = 300.0  
 Element prediction: Off  
 Number of isotope peaks used for i-FIT = 3

Monoisotopic Mass, Even Electron Ions  
 28 formula(e) evaluated with 1 results within limits (up to 50 closest results for each mass)

Elements Used:  
 C: 1-300 H: 1-1000 N: 58-58 O: 71-71 P: 10-10  
 2P13-11C2  
 M-10469 175 (3.652) M3 [Ev-1727827, #50, En1] (25000.0, 2, Pep, Cmp); Cm (174:214)

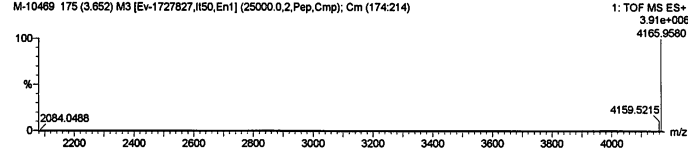

| Mass      | Calc. Mass | mDa | PPM | DBE  | i-FIT | Norm | Conf(%) | Formula               |
|-----------|------------|-----|-----|------|-------|------|---------|-----------------------|
| 4165.9580 | 4165.9555  | 2.5 | 0.6 | 89.5 | 45.5  | n/a  | n/a     | C144 H179 N58 O71 P10 |

Py<sub>3</sub>-γ-I<sub>m</sub><sub>3</sub>-NH(CH<sub>2</sub>)<sub>2</sub>-ON [ON 4 (n = 2)]

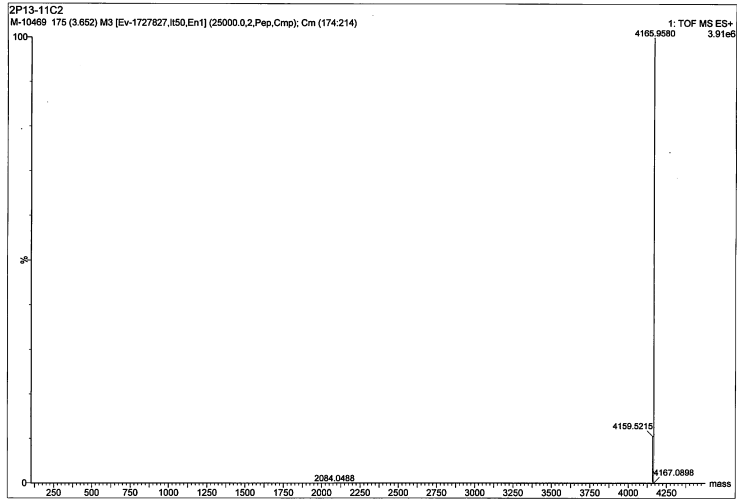



Py<sub>3</sub>-γ-Im<sub>3</sub>-NH(CH<sub>2</sub>)<sub>3</sub>-ON [ON 4 (n = 3)]

Elemental Composition Report

Single Mass Analysis

Tolerance = 5.0 PPM / DBE: min = -1.5, max = 300.0  
 Element prediction: Off  
 Number of isotope peaks used for i-FIT = 3

Monoisotopic Mass, Even Electron Ions  
 29 formula(e) evaluated with 1 results within limits (up to 20 closest results for each mass)  
 Elements Used:

C: 1-300 H: 1-1000 N: 58-58 O: 71-71 P: 10-10

yu2-16-15  
 M-8218 154 (1.832) M3 [Ev-804306,I50,En1] (0.030,200.00,0.100,1000.00,2,Cmp); Sm (SG, 9x3.00); Sb (1,40.00); Cm (148,278) 3.22e+004

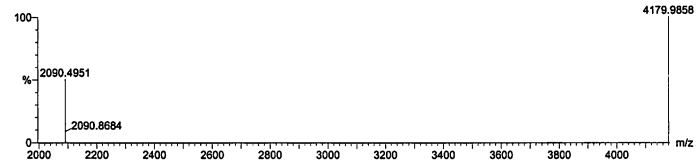

Minimum: 100.0 5.0 -1.5  
 Maximum: 300.0

| Mass      | Calc. Mass | mDa  | PPM | DBE  | i-FIT | Formula               |
|-----------|------------|------|-----|------|-------|-----------------------|
| 4179.9858 | 4179.9712  | 14.6 | 3.5 | 89.5 | n/a   | C145 H181 N58 O71 P10 |

Py<sub>3</sub>-γ-Im<sub>3</sub>-NH(CH<sub>2</sub>)<sub>3</sub>-ON [ON 4 (n = 3)]

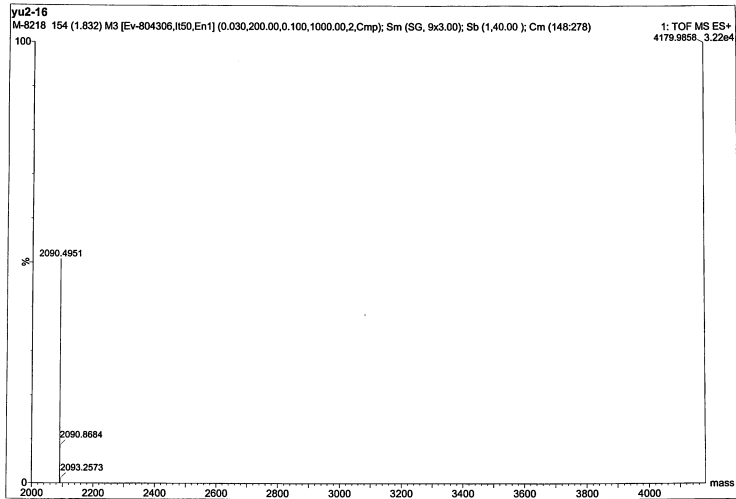

Py<sub>3</sub>-γ-lm<sub>3</sub>-NH(CH<sub>2</sub>)<sub>4</sub>-ON [ON 4 (n = 4)]

Elemental Composition Report

Single Mass Analysis

Tolerance = 5.0 PPM / DBE: min = 0.5, max = 500.0

Element prediction: Off

Number of isotope peaks used for i-FIT = 4

Monoisotopic Mass, Even Electron Ions

11 formula(s) evaluated with 1 results within limits (up to 20 closest results for each mass)

Elements Used:

C: 146-146 H: 1-1000 N: 58-58 O: 71-71 P: 0-10

yu-172b

M-6785 56 (0.672) M3 [Ev-787378,150,En1] (0.030,200.00,0.100,1000.00,2,Cmp); Cm (33:210)

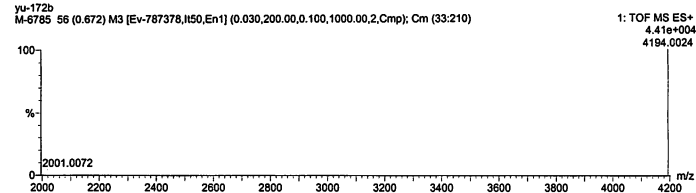

Minimum: 0.5  
Maximum: 500.0

| Mass      | Calc. Mass | mDa  | PPM | DBE  | i-FIT | Formula               |
|-----------|------------|------|-----|------|-------|-----------------------|
| 4194.0024 | 4193.9868  | 15.6 | 3.7 | 89.5 | n/a   | C146 H183 N58 O71 P10 |

Py<sub>3</sub>-γ-lm<sub>3</sub>-NH(CH<sub>2</sub>)<sub>4</sub>-ON [ON 4 (n = 4)]

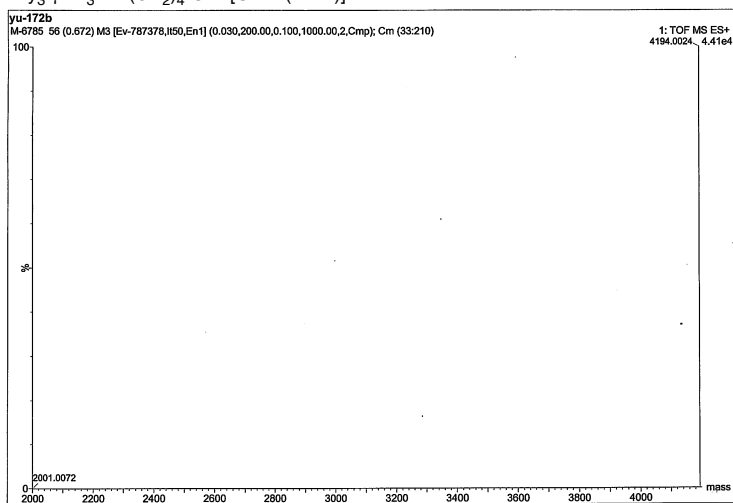

**Figure S5:** UV melting curves of modified dsDNA (4.3  $\mu\text{M}$ ) in 10 mM sodium phosphate buffer (pH 7.0) containing 10 mM NaCl and 0.1 mM  $\text{Na}_2\text{EDTA}$ .

The melting temperature ( $T_m$ ) was obtained using a TMSPC-8 with  $T_m$  analysis software.

Modified dsDNA: 5'-d(CGGAATTTGGC)-3'/complementary DNA

**ON 1** [G =  $\text{Py}_4\text{-NH}(\text{CH}_2)_4\text{-G}$ ], **ON 2** [G =  $\text{Py}_3\text{-NH}(\text{CH}_2)_4\text{-G}$ ]

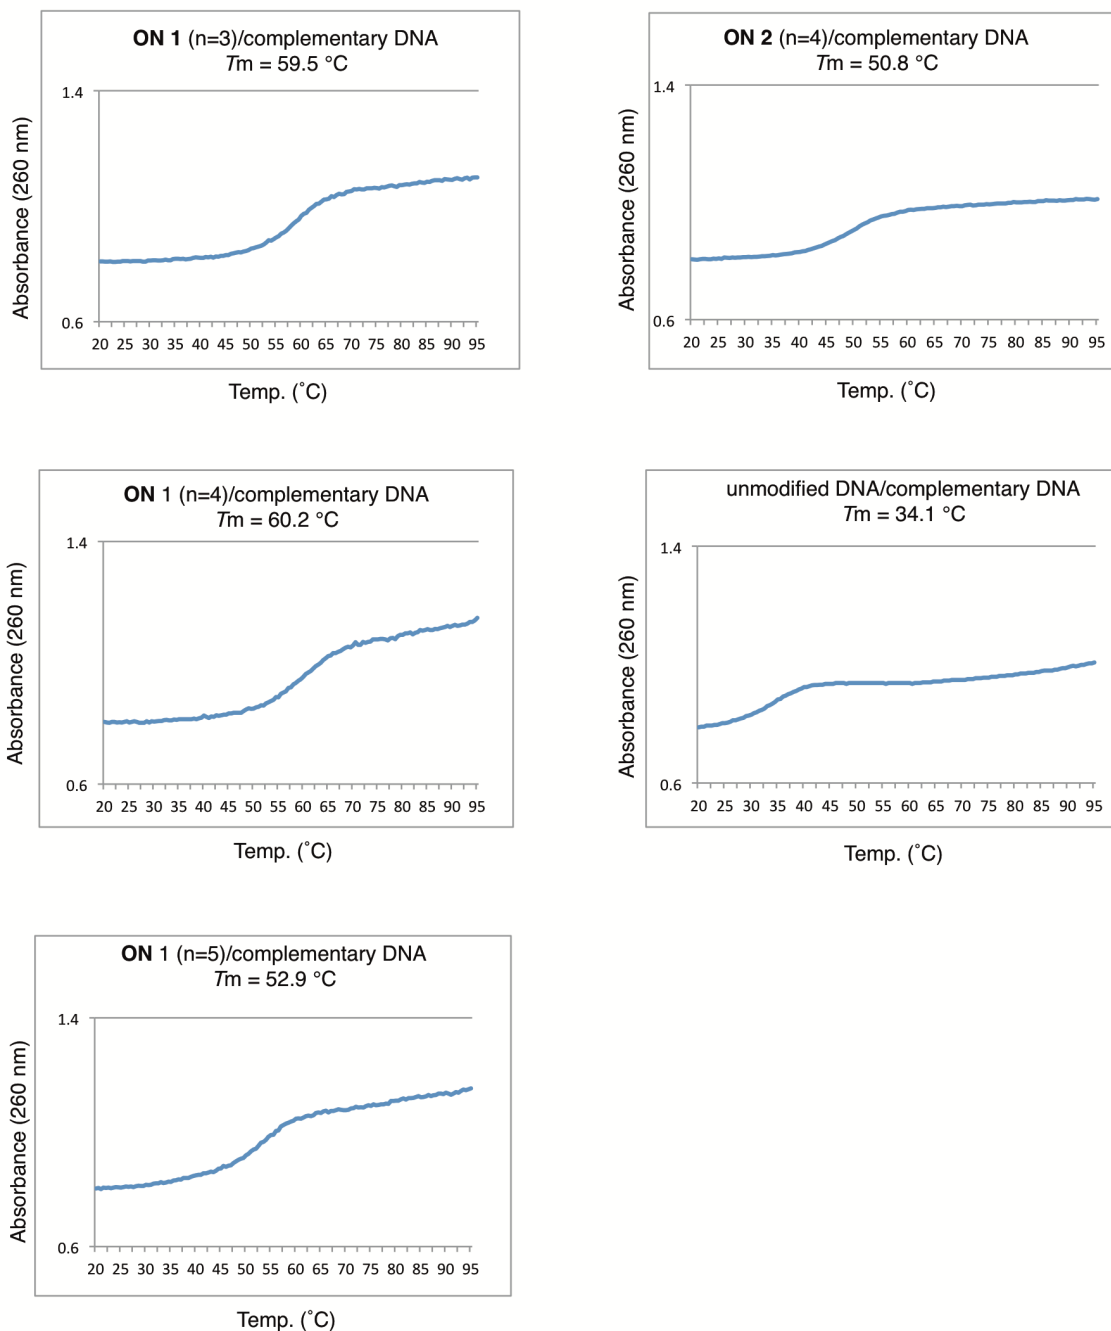

5'-d(CGGAATTTGGC)-3'/mismatch DNA

5'-d(CGGAATTTGGC)-3'  
3'-d(GCCTTcAACCG)-5'

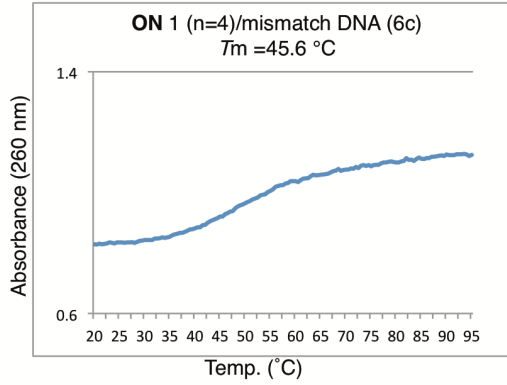

5'-d(CGGAATTTGGC)-3'  
3'-d(GCaTTcAACCG)-5'

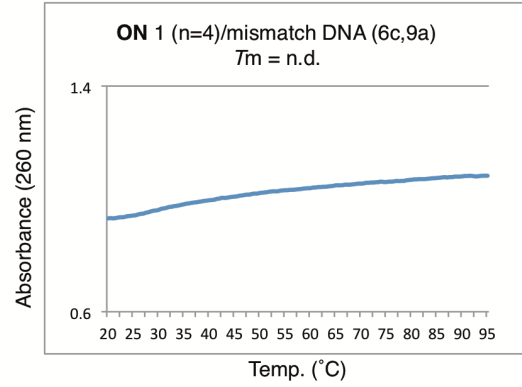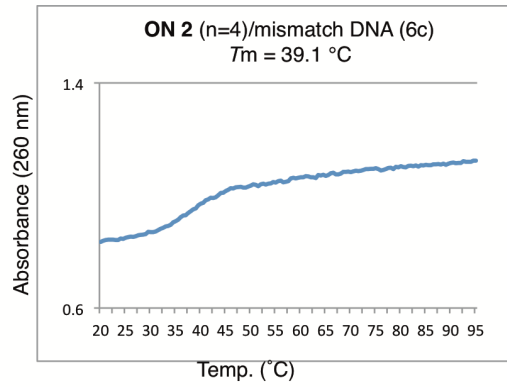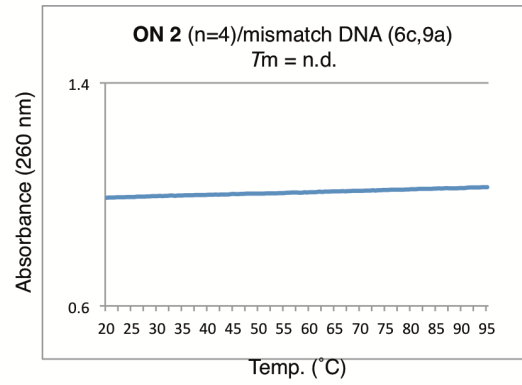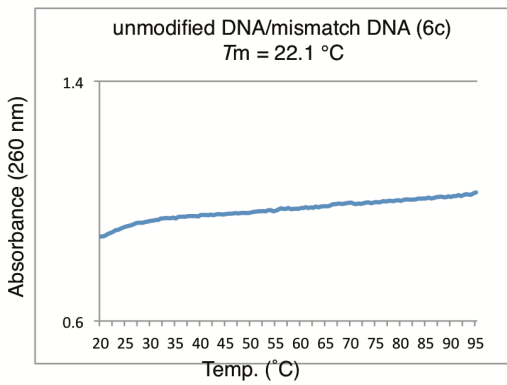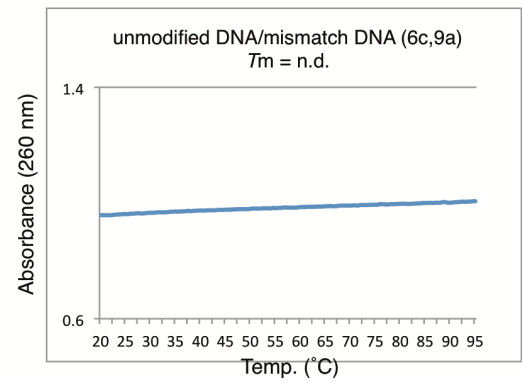

Modified dsDNA: 5'-d(CGGACCCTGGC)-3'/complementary DNA

ON 3 [ $G = \text{Im}_3\text{-NH}(\text{CH}_2)_4\text{-G}$ ], ON 4 [ $G = \text{Py}_3\text{-}\gamma\text{-Im}_3\text{-NH}(\text{C}_2)_2\text{-G}$ ]

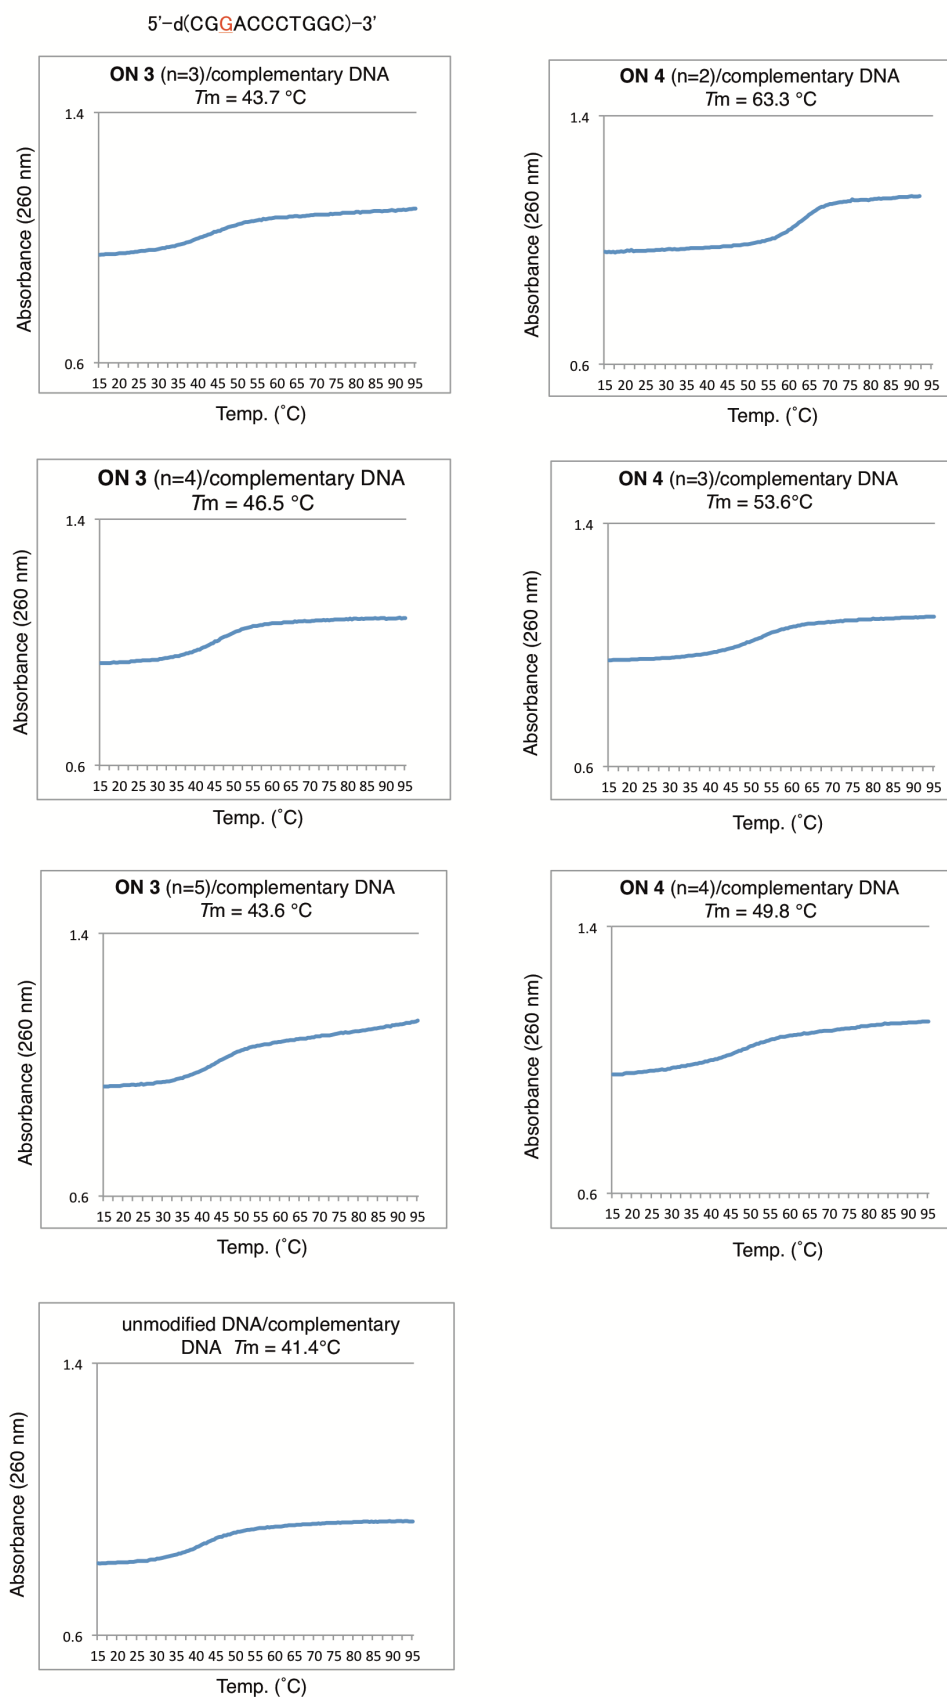

5'-d(CGGACCCTGGC)-3'/mismatch DNA

5'-d(CGGACCCTGGC)-3'  
3'-d(GCCTGaGACCG)-5'

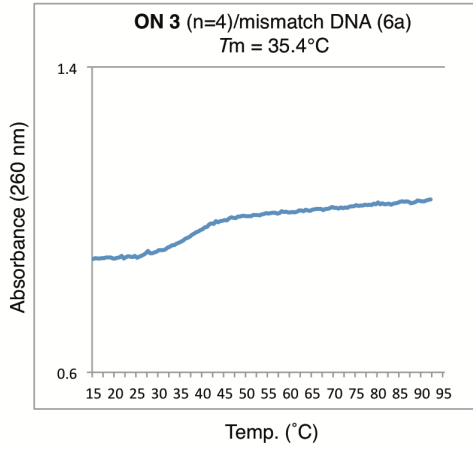

5'-d(CGGACCCTGGC)-3'  
3'-d(GCCTGGGACtG)-5'

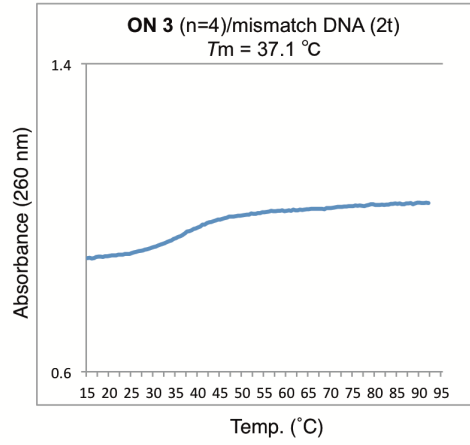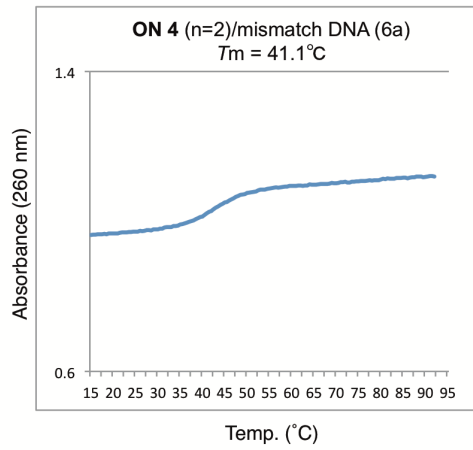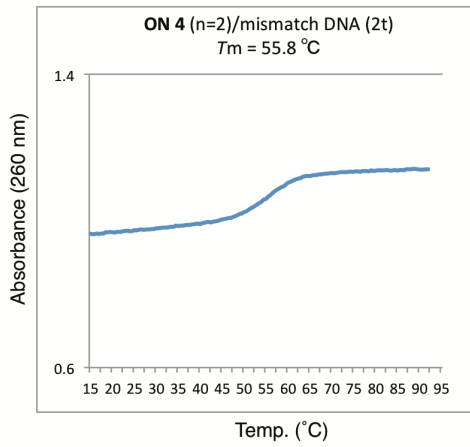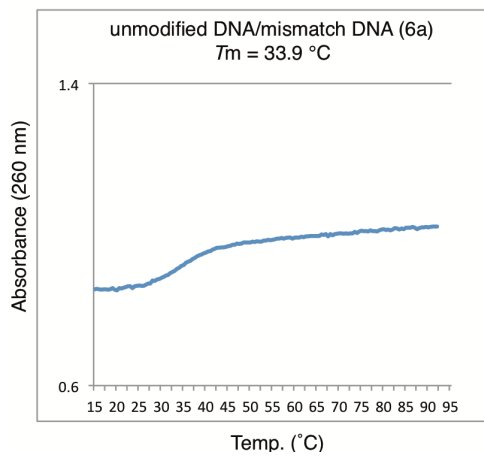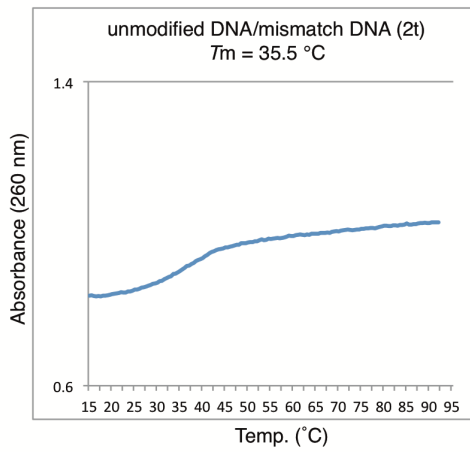

**Figure S6:** CD spectra of modified dsDNAs (5.8  $\mu\text{M}$ ) in 10 mM sodium phosphate buffer (pH 7.0) containing 10 mM NaCl and 0.1 mM  $\text{Na}_2\text{EDTA}$ .

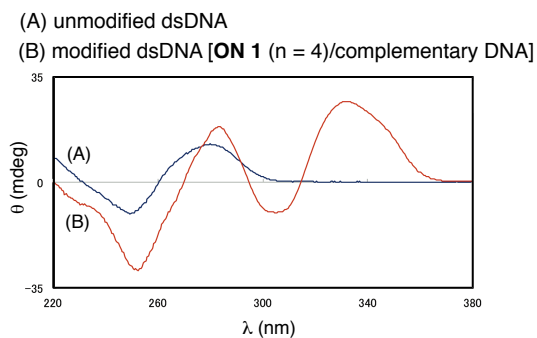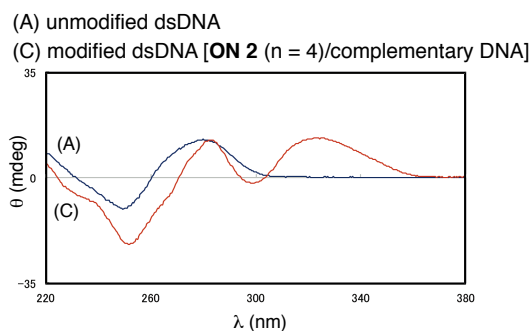

CD spectra of unmodified and modified dsDNAs.

modified DNA : 5'-d(CGG**G**AATTTGGC)-3'

**ON 1** [**G** =  $\text{Py}_4\text{-NH}(\text{CH}_2)_n\text{-G}$ ], **ON 2** [**G** =  $\text{Py}_3\text{-NH}(\text{CH}_2)_n\text{-G}$ ]

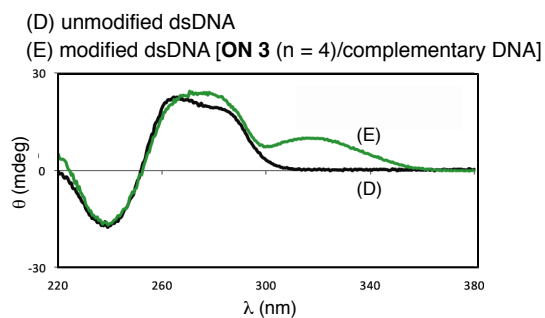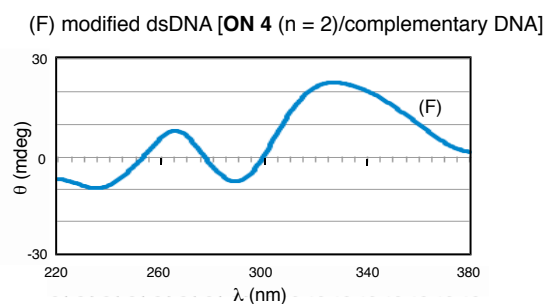

CD spectra of unmodified and modified dsDNAs.

modified DNA : 5'-d(CGG**G**ACCCTGGC)-3'

**ON 3** [**G** =  $\text{Im}_3\text{-NH}(\text{CH}_2)_n\text{-G}$ ], **ON 4** [**G** =  $\text{Py}_3\text{-}\gamma\text{-Im}_3\text{-NH}(\text{CH}_2)_n\text{-G}$ ]
